# Supplementary material for: Synthesis and biological activity of dehydrophos derivatives
Source: Royal Society of Chemistry journal article supplement (doi:10.1039/c8ob03079k), 2019-01-01

## NMR SPECTRA (page 1 of 32 pages)

### Table of contents

|                                                                                                                  |    |
|------------------------------------------------------------------------------------------------------------------|----|
| <b>[1-(L-leucylamido)ethen-1-yl]phosphonic acid monomethyl ester, (1)</b> .....                                  | 4  |
| <sup>1</sup> H NMR spectrum .....                                                                                | 4  |
| APTC NMR spectrum .....                                                                                          | 4  |
| <sup>31</sup> P NMR spectrum .....                                                                               | 5  |
| <b>Tetramethyl [N-(9-fluorenylmethoxycarbonyl)glycylamidomethyl]bisphosphonate, (5)</b> .....                    | 6  |
| <sup>1</sup> H NMR spectrum .....                                                                                | 6  |
| APTC NMR spectrum .....                                                                                          | 6  |
| <sup>31</sup> P NMR spectrum .....                                                                               | 7  |
| <b>Dimethyl {1-[N-(9-fluorenylmethoxycarbonyl)glycylamido]ethen-1-yl}phosphonate (7)</b> .....                   | 8  |
| <sup>1</sup> H NMR spectrum .....                                                                                | 8  |
| APTC NMR spectrum .....                                                                                          | 8  |
| <sup>31</sup> P NMR spectrum .....                                                                               | 9  |
| <b>[1-(glycylamido)ethen-1-yl]phosphonic acid monomethyl ester (2)</b> .....                                     | 10 |
| <sup>1</sup> H NMR spectrum .....                                                                                | 10 |
| APTC NMR spectrum .....                                                                                          | 10 |
| <sup>31</sup> P NMR spectrum .....                                                                               | 11 |
| <b>Tetramethyl [N-(tert-butoxycarbonyl)glycyl-L-leucylamidomethyl]bisphosphonate (10)</b> .....                  | 12 |
| <sup>1</sup> H NMR spectrum .....                                                                                | 12 |
| APTC NMR spectrum .....                                                                                          | 12 |
| <sup>31</sup> P NMR spectrum .....                                                                               | 13 |
| <b>Dimethyl (E)-{1-[N-(tert-butoxycarbonyl)glycyl-L-leucylamido]prop-1-en-1-yl}phosphonate (E-11)</b> .....      | 14 |
| <sup>1</sup> H NMR spectrum .....                                                                                | 14 |
| APTC NMR spectrum .....                                                                                          | 14 |
| <sup>31</sup> P NMR spectrum .....                                                                               | 15 |
| <b>Dimethyl (Z)-{1-[N-(tert-butoxycarbonyl)glycyl-L-leucylamido]prop-1-en-1-yl}phosphonate (Z-11)</b> .....      | 16 |
| <sup>1</sup> H NMR spectrum .....                                                                                | 16 |
| APTC NMR spectrum .....                                                                                          | 16 |
| <sup>31</sup> P NMR spectrum .....                                                                               | 17 |
| <b>Dimethyl (E)-{1-[N-(tert-butoxycarbonyl)glycyl-L-leucylamido]-2-phenylethen-1-yl}phosphonate (E-12)</b> ..... | 18 |
| <sup>1</sup> H NMR spectrum .....                                                                                | 18 |
| APTC NMR spectrum .....                                                                                          | 18 |
| <sup>31</sup> P NMR spectrum .....                                                                               | 19 |
| <b>Dimethyl (Z)-{1-[N-(tert-butoxycarbonyl)glycyl-L-leucylamido]-2-phenylethen-1-yl}phosphonate (Z-12)</b> ..... | 20 |

|                                                                                                     |    |
|-----------------------------------------------------------------------------------------------------|----|
| <sup>1</sup> H NMR spectrum .....                                                                   | 20 |
| APTC NMR spectrum .....                                                                             | 20 |
| <sup>31</sup> P NMR spectrum .....                                                                  | 21 |
| <b>(E)-[1-(glycyl-L-leucylamido)prop-1-en-1-yl]phosphonic acid monomethyl ester (13)</b> .....      | 22 |
| <sup>1</sup> H NMR spectrum .....                                                                   | 22 |
| APTC NMR spectrum .....                                                                             | 22 |
| <sup>31</sup> P NMR spectrum .....                                                                  | 23 |
| <b>(E)-[1-(glycyl-L-leucylamido)-2-phenylethen-1-yl]phosphonic acid monomethyl ester (14)</b> ..... | 24 |
| <sup>1</sup> H NMR spectrum .....                                                                   | 24 |
| APTC NMR spectrum .....                                                                             | 24 |
| <sup>31</sup> P NMR spectrum .....                                                                  | 25 |
| <b>Tetraethyl (benzyloxycarbonylaminomethyl)bisphosphonate (17)</b> .....                           | 26 |
| <sup>1</sup> H NMR spectrum .....                                                                   | 26 |
| APTC NMR spectrum .....                                                                             | 26 |
| <sup>31</sup> P NMR spectrum .....                                                                  | 27 |
| <b>Tetraethyl [N-(tert-butoxycarbonyl)-L-leucylamidomethyl]bisphosphonate (18)</b> .....            | 28 |
| <sup>1</sup> H NMR spectrum .....                                                                   | 28 |
| APTC NMR spectrum .....                                                                             | 28 |
| <sup>31</sup> P NMR spectrum .....                                                                  | 29 |
| <b>Tetraethyl [N-(tert-butoxycarbonyl)glycyl-L-leucylamidomethyl]bisphosphonate (19)</b> .....      | 30 |
| <sup>1</sup> H NMR spectrum .....                                                                   | 30 |
| APTC NMR spectrum .....                                                                             | 30 |
| <sup>31</sup> P NMR spectrum .....                                                                  | 31 |
| <b>Diethyl {1-[N-(tert-butoxycarbonyl)glycyl-L-leucylamido]ethen-1-yl}phosphonate (20)</b> .....    | 32 |
| <sup>1</sup> H NMR spectrum .....                                                                   | 32 |
| APTC NMR spectrum .....                                                                             | 32 |
| <sup>31</sup> P NMR spectrum .....                                                                  | 33 |
| <b>(Benzyloxycarbonylaminomethyl)bis(phosphonic acid monomethyl ester) (21)</b> .....               | 34 |
| <sup>1</sup> H NMR spectrum .....                                                                   | 34 |
| APTC NMR spectrum .....                                                                             | 34 |
| <sup>31</sup> P NMR spectrum .....                                                                  | 35 |
| <b>Diethyl dimethyl (benzyloxycarbonylaminomethyl)bisphosphonate (22)</b> .....                     | 36 |
| <sup>1</sup> H NMR spectrum .....                                                                   | 36 |
| APTC NMR spectrum .....                                                                             | 36 |
| <sup>31</sup> P NMR spectrum .....                                                                  | 37 |
| <b>Diisopropyl dimethyl (benzyloxycarbonylaminomethyl)bisphosphonate (23)</b> .....                 | 38 |
| <sup>1</sup> H NMR spectrum .....                                                                   | 38 |
| APTC NMR spectrum .....                                                                             | 38 |

|                                                                                                                         |    |
|-------------------------------------------------------------------------------------------------------------------------|----|
| <sup>31</sup> P NMR spectrum .....                                                                                      | 39 |
| <b>Diethyl dimethyl [<i>N</i>-(<i>tert</i>-butoxycarbonyl)glycyl-L-leucylamidomethyl]bisphosphonate (24)</b> .....      | 40 |
| <sup>1</sup> H NMR spectrum .....                                                                                       | 40 |
| APTC NMR spectrum .....                                                                                                 | 40 |
| <sup>31</sup> P NMR spectrum .....                                                                                      | 41 |
| <b>Diisopropyl dimethyl [<i>N</i>-(<i>tert</i>-butoxycarbonyl)glycyl-L-leucylamidomethyl]bisphosphonate (25)</b> .....  | 42 |
| <sup>1</sup> H NMR spectrum .....                                                                                       | 42 |
| APTC NMR spectrum .....                                                                                                 | 42 |
| <sup>31</sup> P NMR spectrum .....                                                                                      | 43 |
| <b>Ethyl methyl {1-[<i>N</i>-(<i>tert</i>-butoxycarbonyl)glycyl-L-leucylamido]ethen-1-yl}phosphonate (26)</b> .....     | 44 |
| <sup>1</sup> H NMR spectrum .....                                                                                       | 44 |
| APTC NMR spectrum .....                                                                                                 | 44 |
| <sup>31</sup> P NMR spectrum .....                                                                                      | 45 |
| <b>Isopropyl methyl {1-[<i>N</i>-(<i>tert</i>-butoxycarbonyl)glycyl-L-leucylamido]ethen-1-yl}phosphonate (27)</b> ..... | 46 |
| <sup>1</sup> H NMR spectrum .....                                                                                       | 46 |
| APTC NMR spectrum .....                                                                                                 | 46 |
| <sup>31</sup> P NMR spectrum .....                                                                                      | 47 |
| <b>[1-(Glycyl-L-leucylamido)ethen-1-yl]phosphonic acid monoethyl ester (15)</b> .....                                   | 48 |
| <sup>1</sup> H NMR spectrum .....                                                                                       | 48 |
| APTC NMR spectrum .....                                                                                                 | 48 |
| <sup>31</sup> P NMR spectrum .....                                                                                      | 49 |
| <b>[1-(Glycyl-L-leucylamido)ethen-1-yl]phosphonic acid monoisopropyl ester (16)</b> .....                               | 50 |
| <sup>1</sup> H NMR spectrum .....                                                                                       | 50 |
| APTC NMR spectrum .....                                                                                                 | 50 |
| <sup>31</sup> P NMR spectrum .....                                                                                      | 51 |
| <b>Dehydrophos</b> .....                                                                                                | 52 |
| <sup>1</sup> H NMR spectrum .....                                                                                       | 52 |
| APTC NMR spectrum .....                                                                                                 | 52 |
| <sup>31</sup> P NMR spectrum .....                                                                                      | 53 |

# [1-(L-leucylamido)ethen-1-yl]phosphonic acid monomethyl ester, (1)

## <sup>1</sup>H NMR spectrum

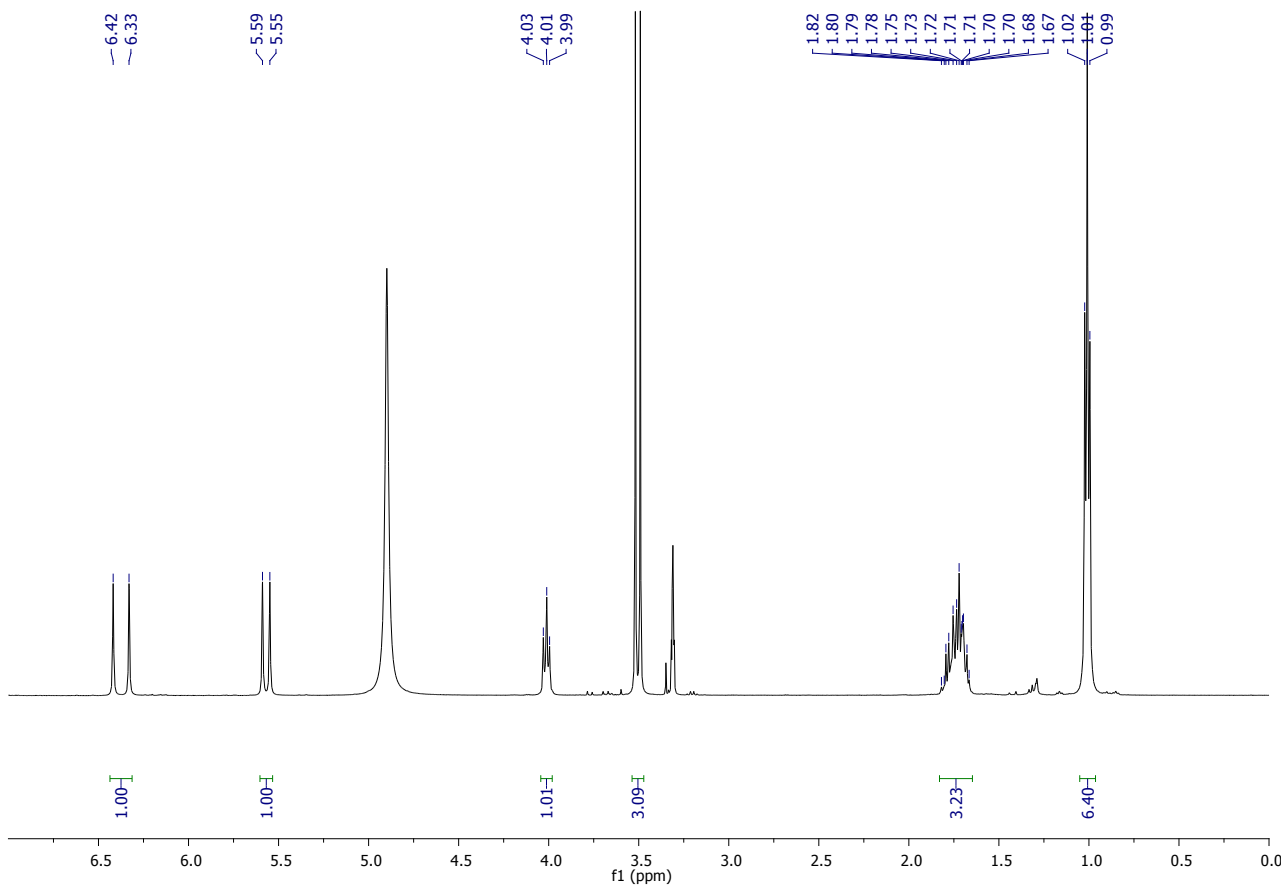

## APTC NMR spectrum

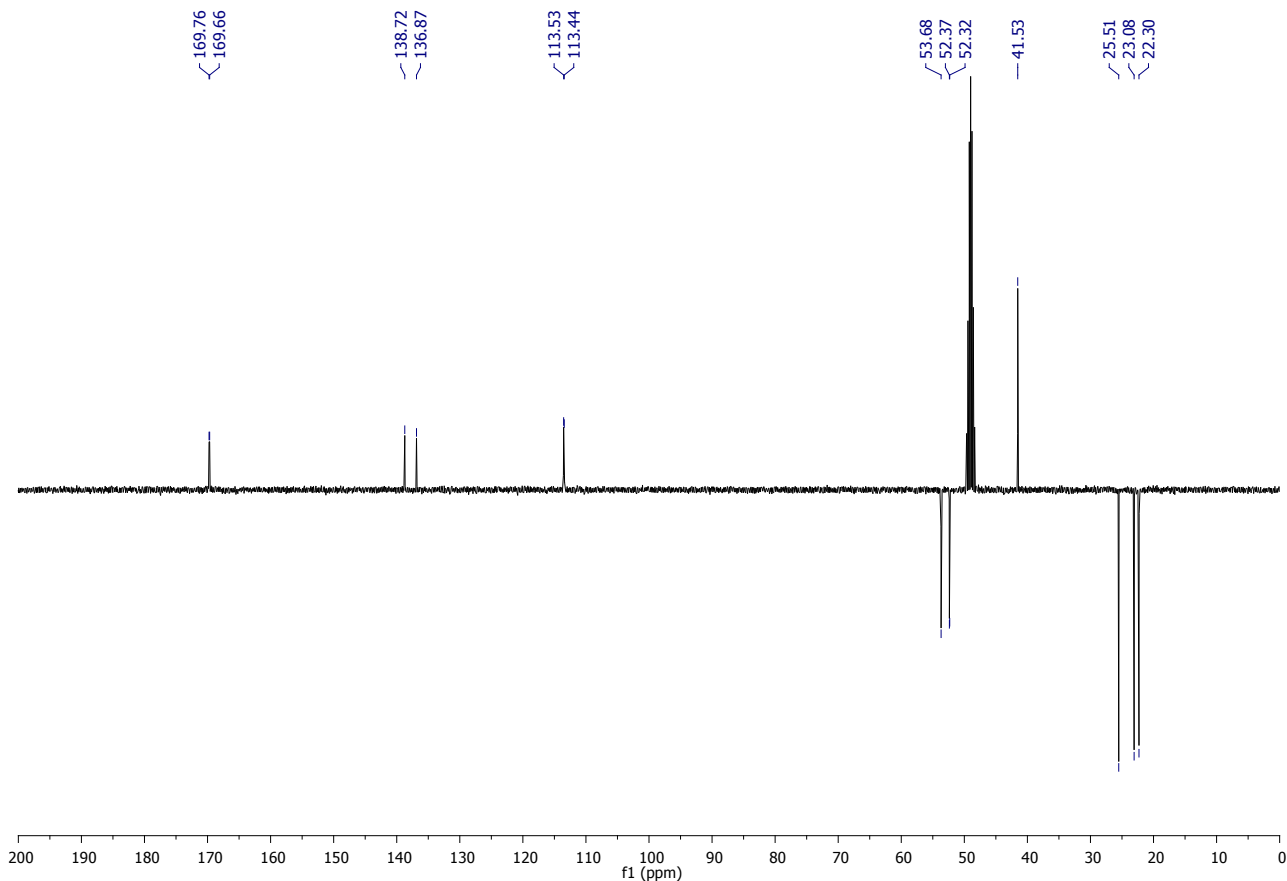

<sup>31</sup>P NMR spectrum

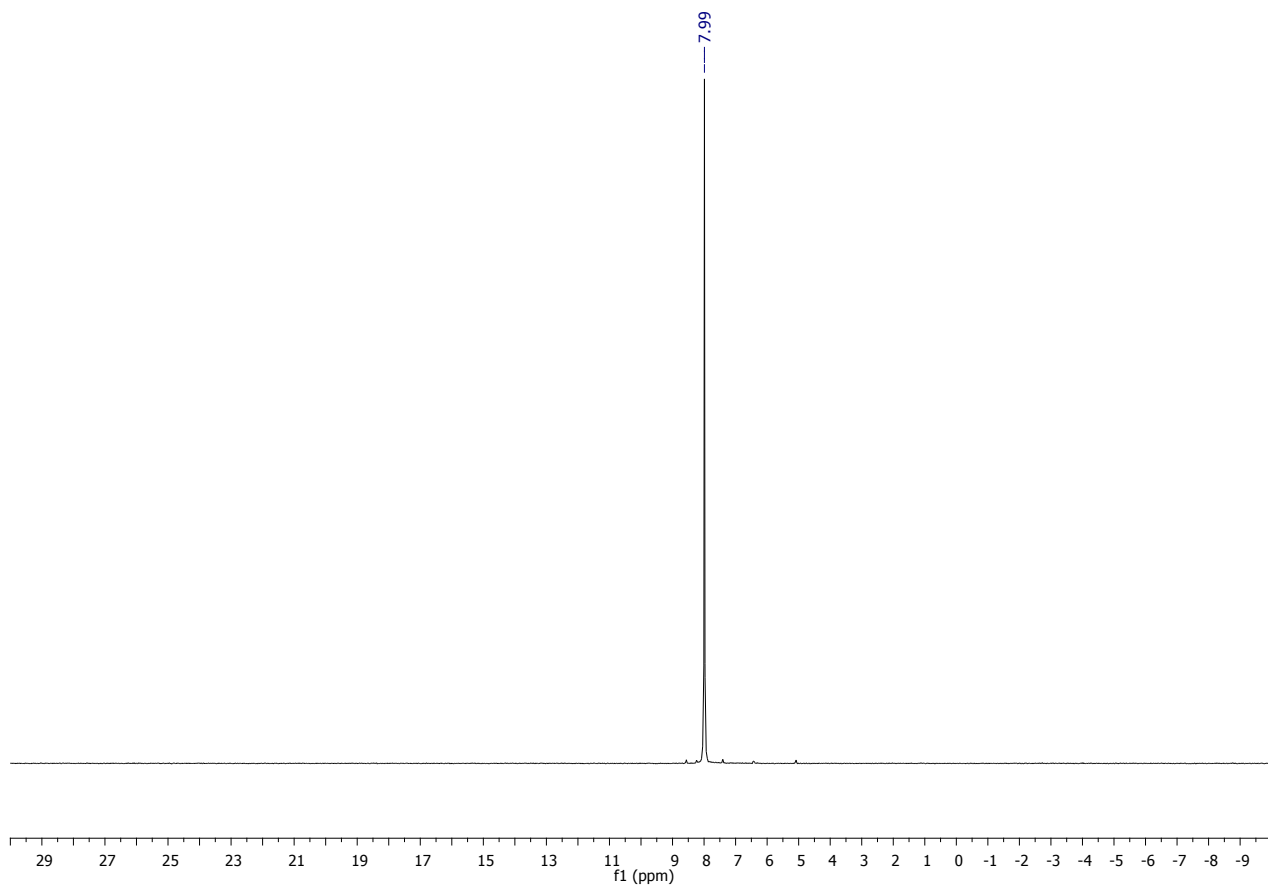

# Tetramethyl [N-(9-fluorenylmethoxycarbonyl)glycylamidomethyl]bisphosphonate, (5)

## <sup>1</sup>H NMR spectrum

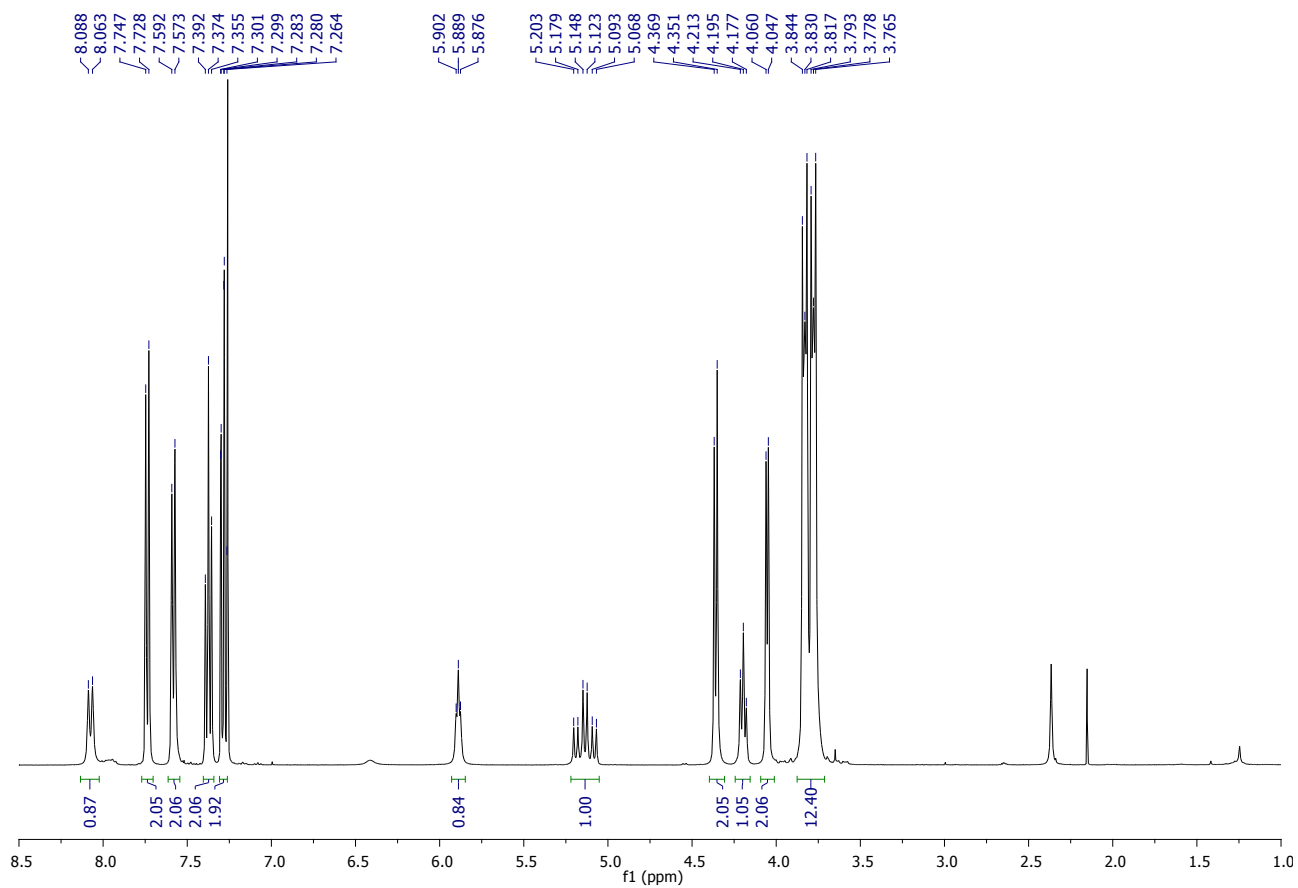

## APTC NMR spectrum

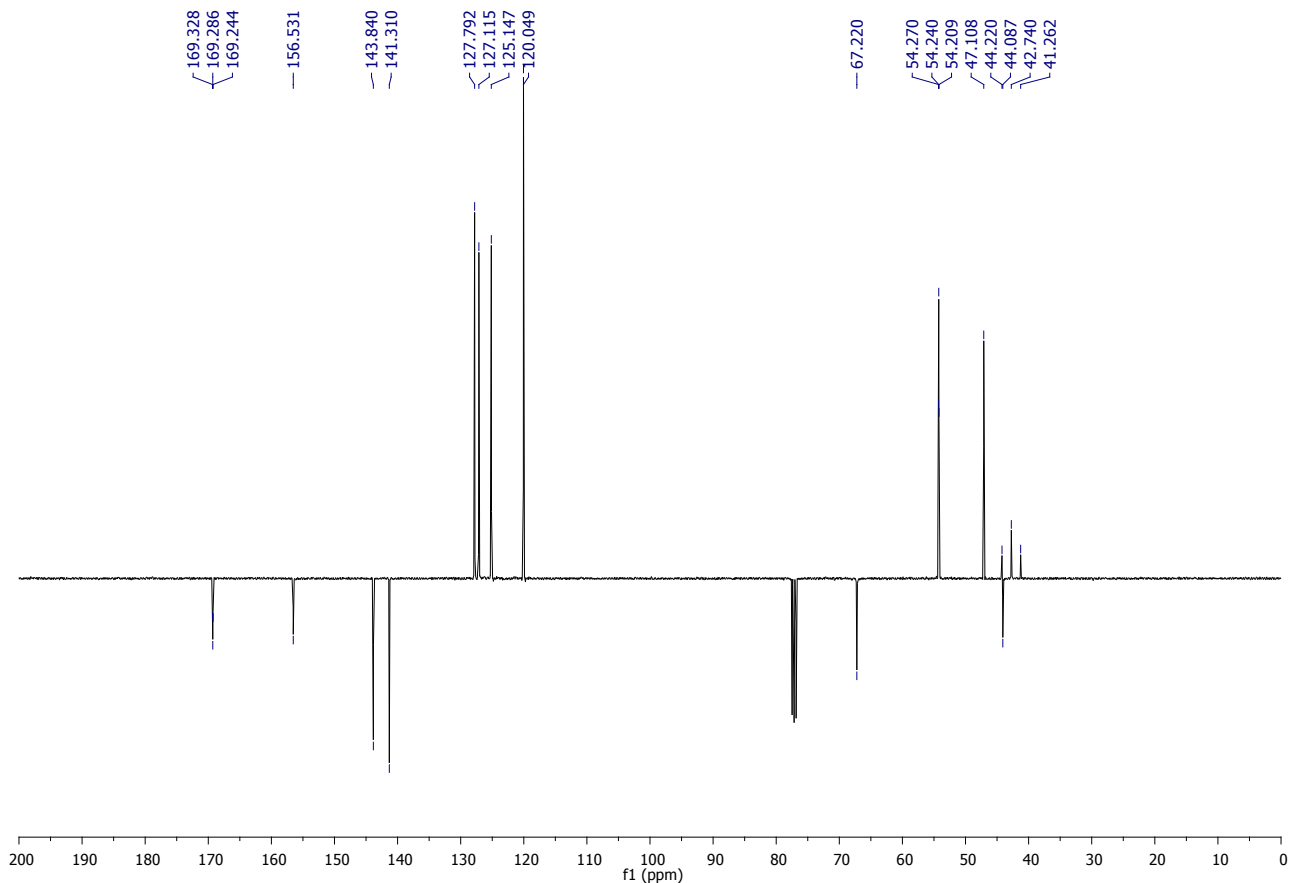

<sup>31</sup>P NMR spectrum

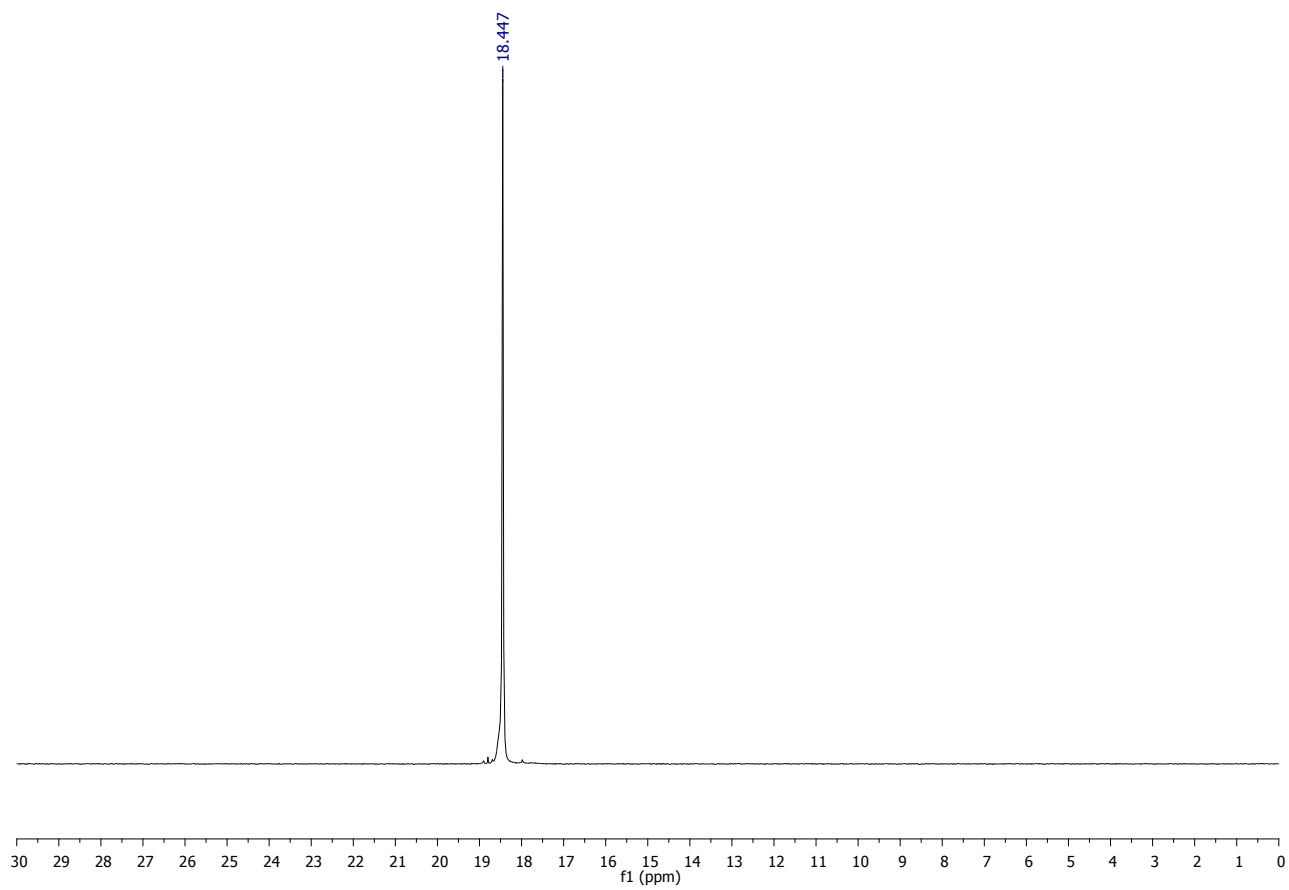

# Dimethyl {1-[N-(9-fluorenylmethoxycarbonyl)glycylamido]ethen-1-yl}phosphonate (7)

## <sup>1</sup>H NMR spectrum

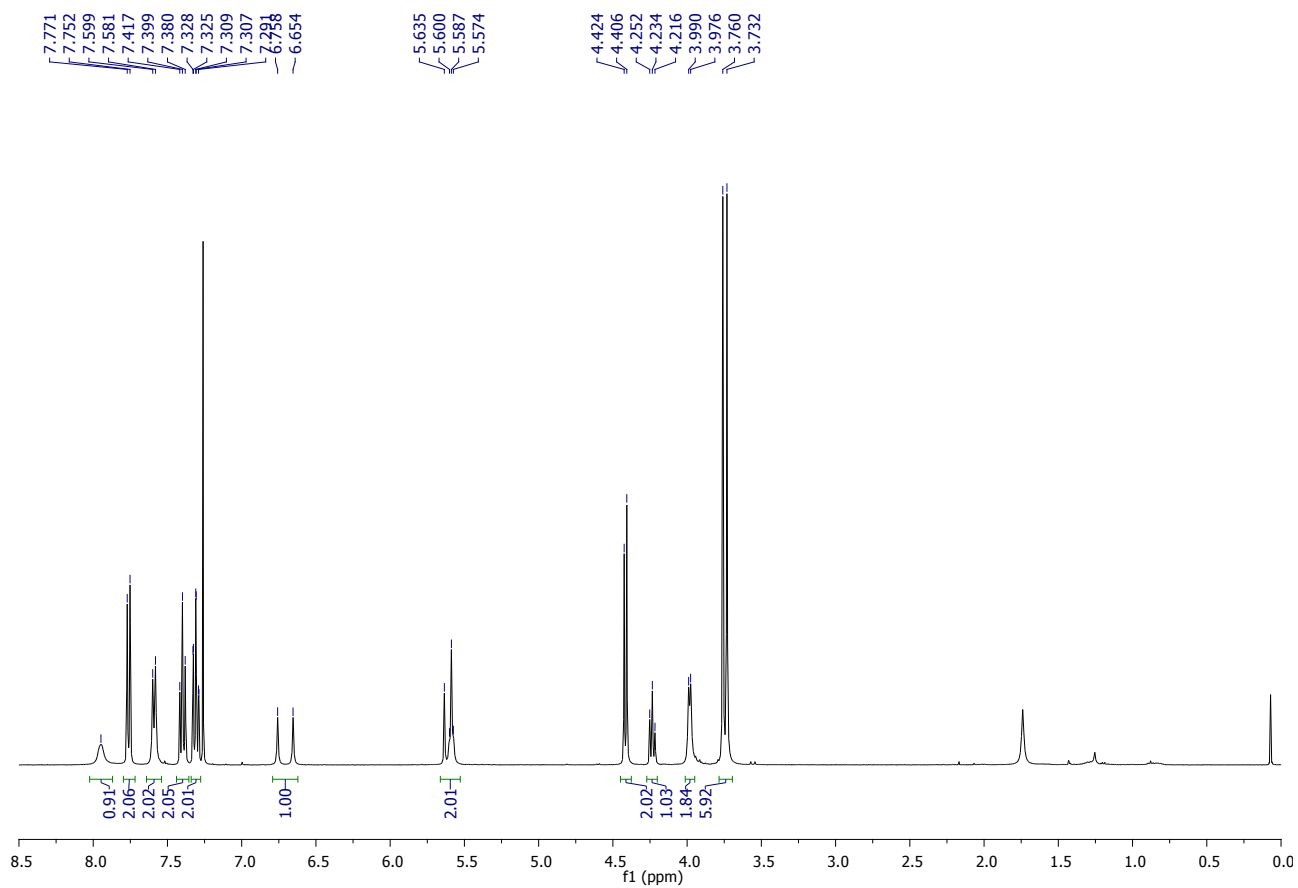

## APTC NMR spectrum

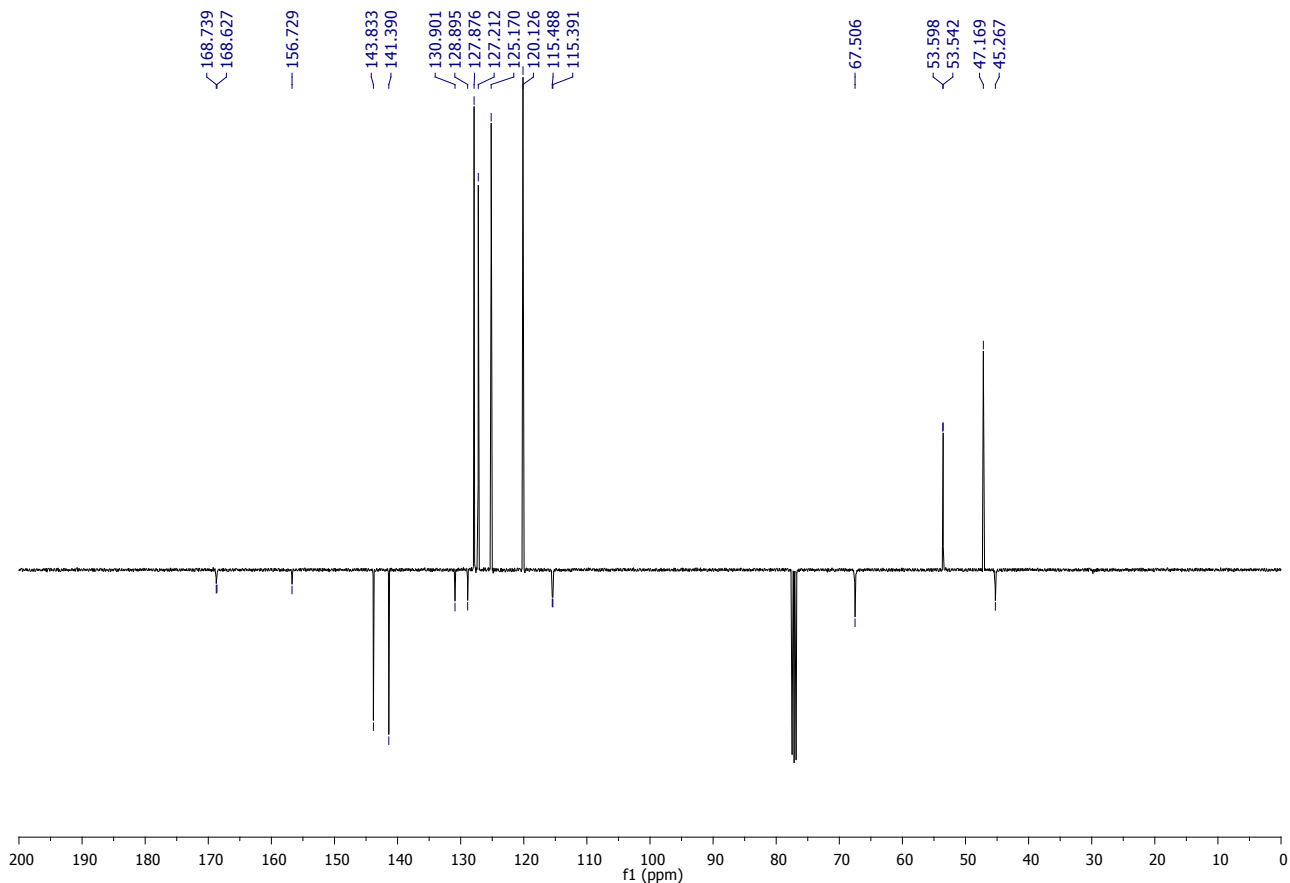



$^{31}\text{P}$  NMR spectrum

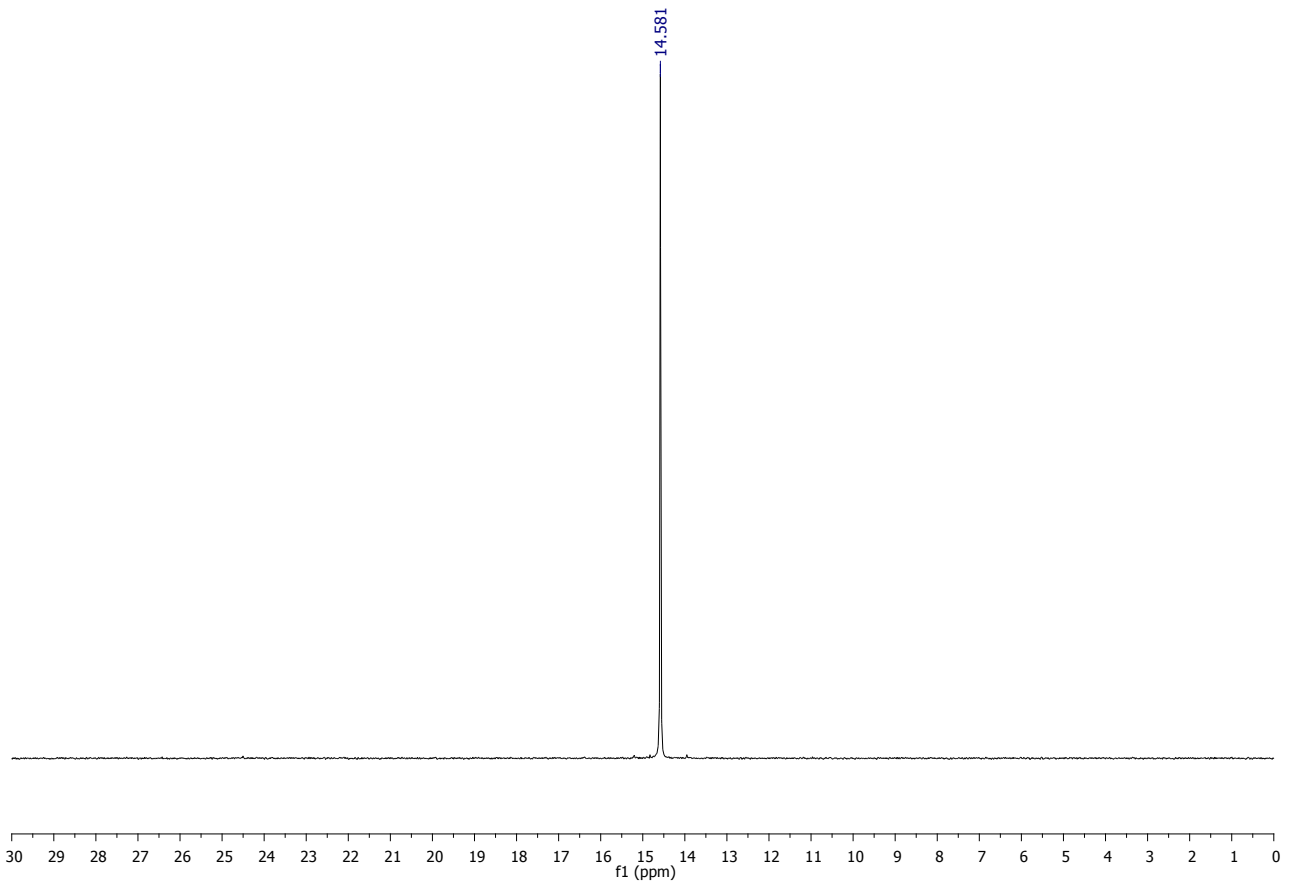

# [1-(glycidamido)ethen-1-yl]phosphonic acid monomethyl ester (2)

$^1\text{H}$  NMR spectrum

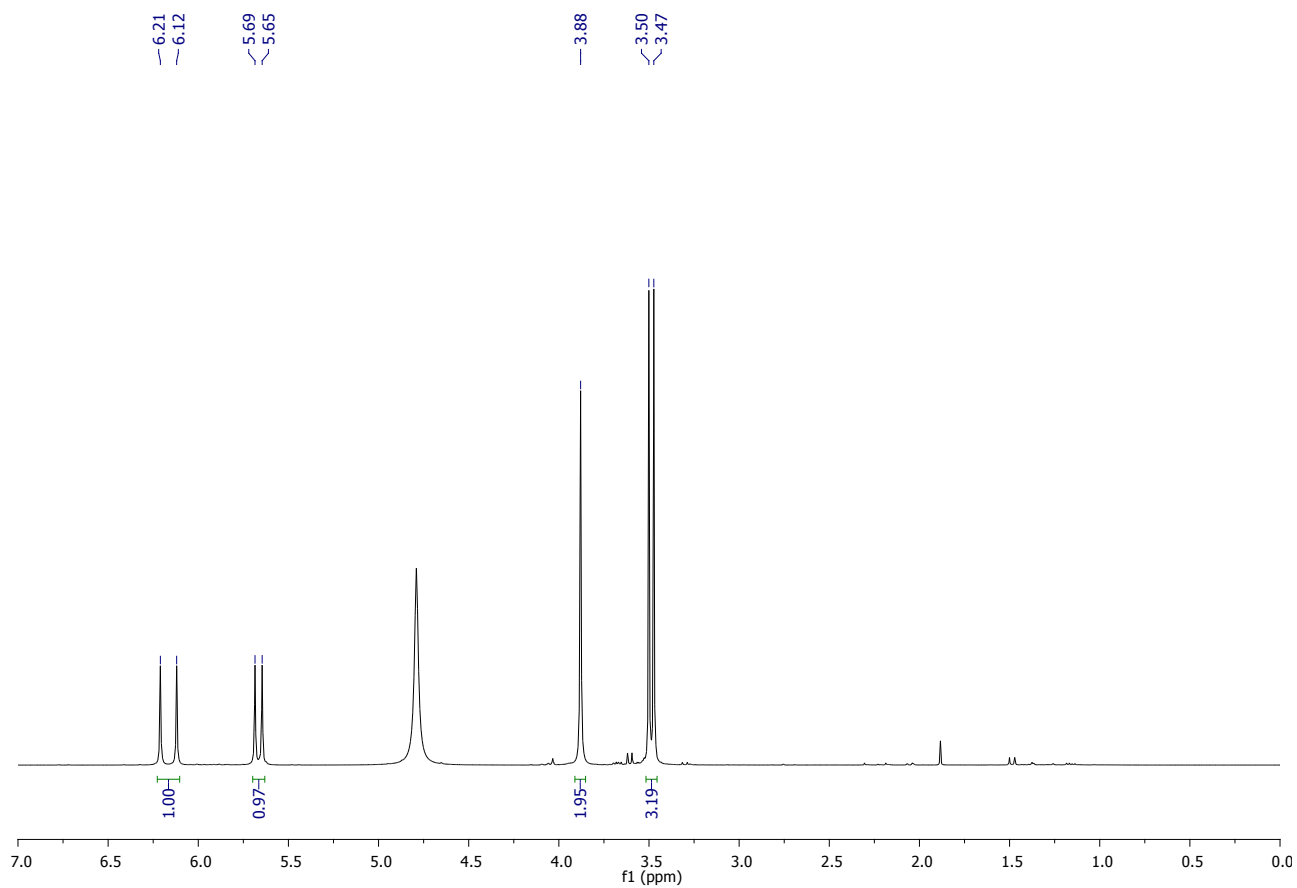

APTC NMR spectrum

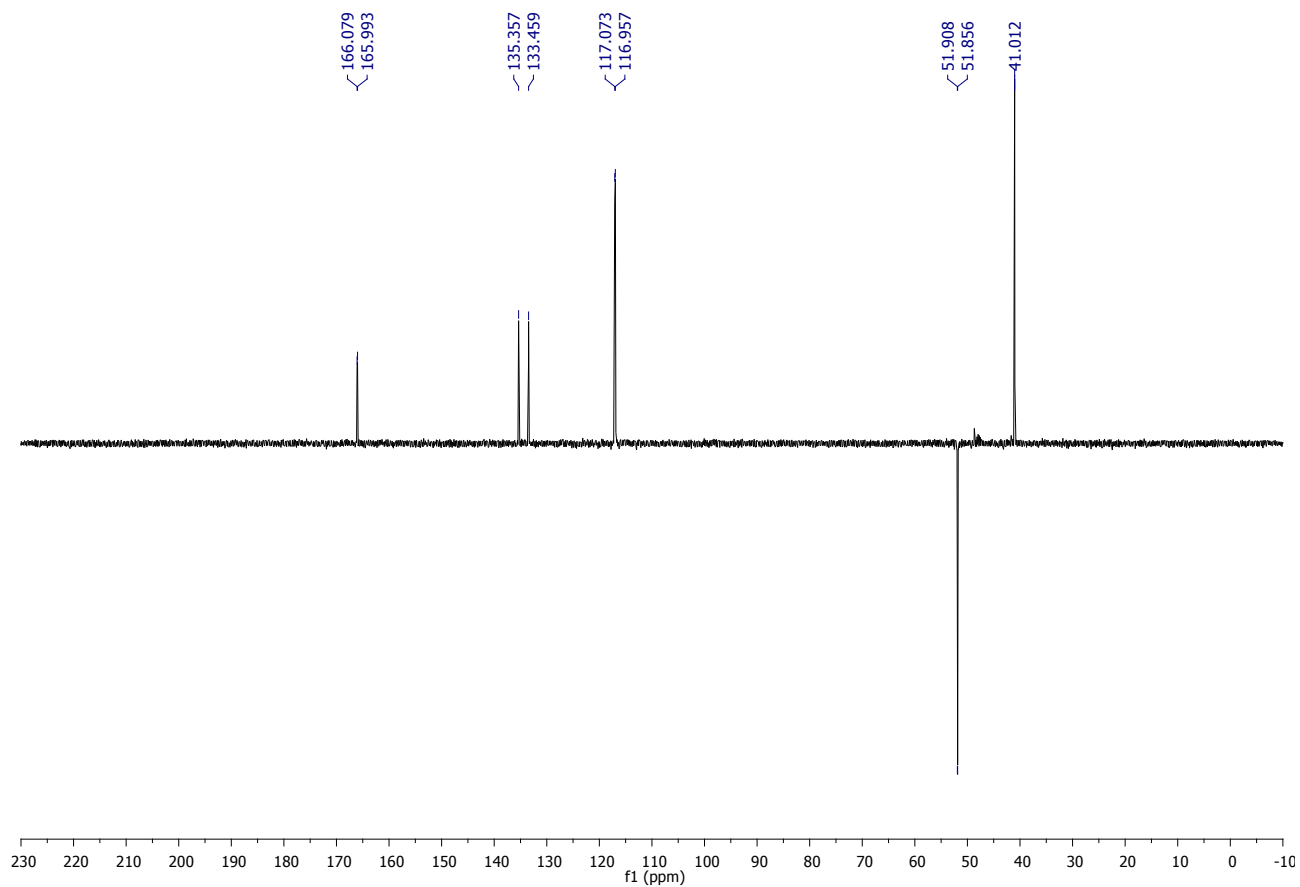

<sup>31</sup>P NMR spectrum

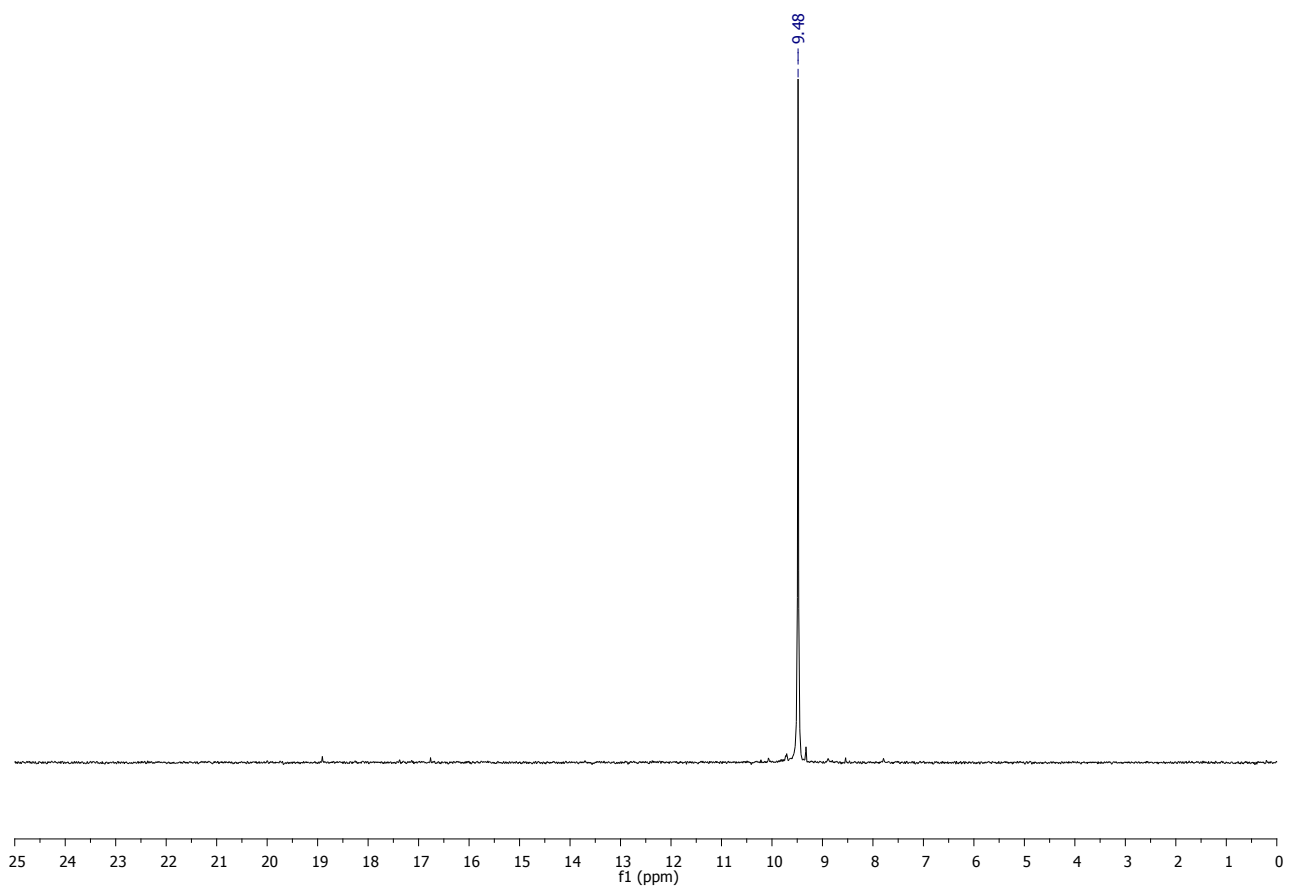

# Tetramethyl [N-(tert-butoxycarbonyl)glycyl-L-leucylamidomethyl]bisphosphonate (10)

## <sup>1</sup>H NMR spectrum

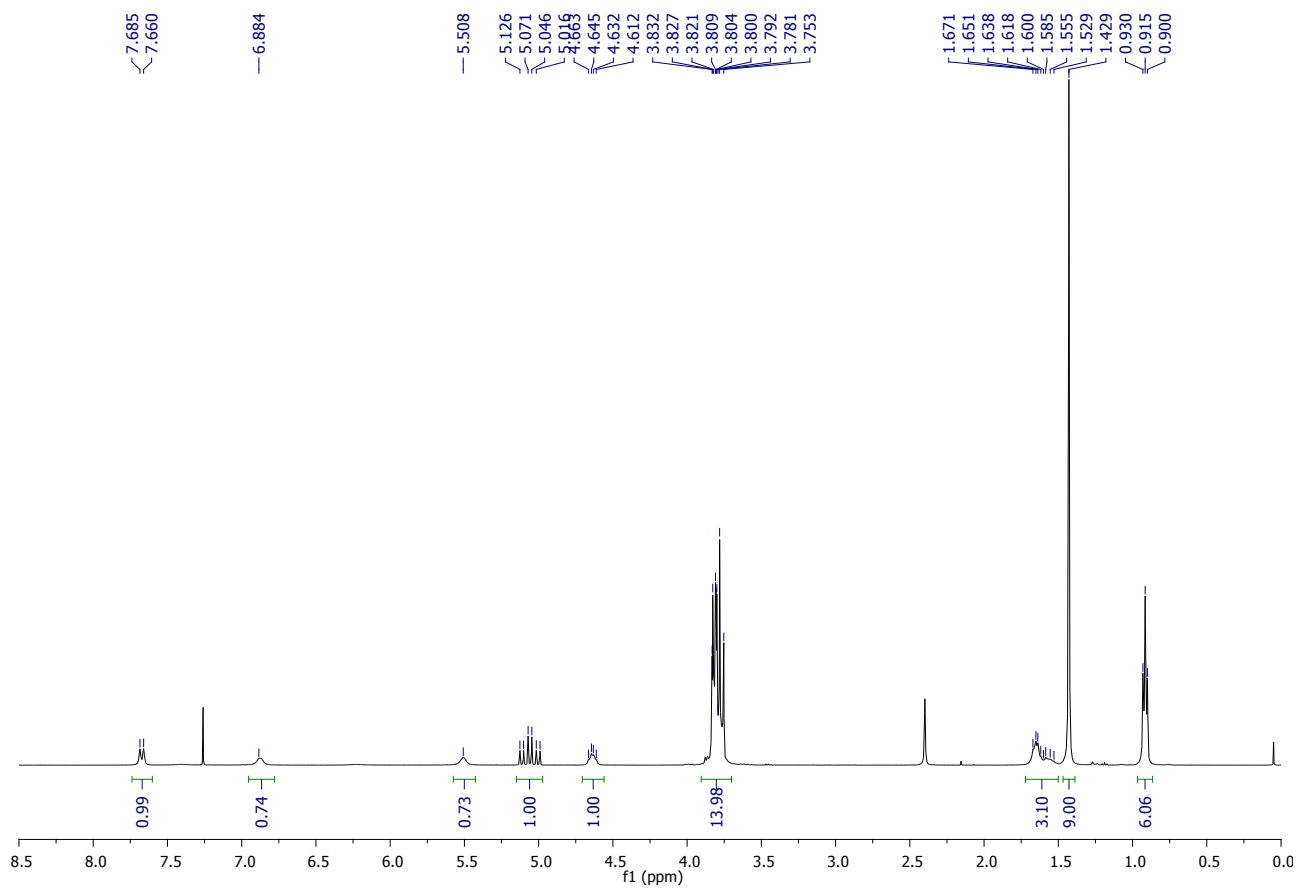

## APTC NMR spectrum

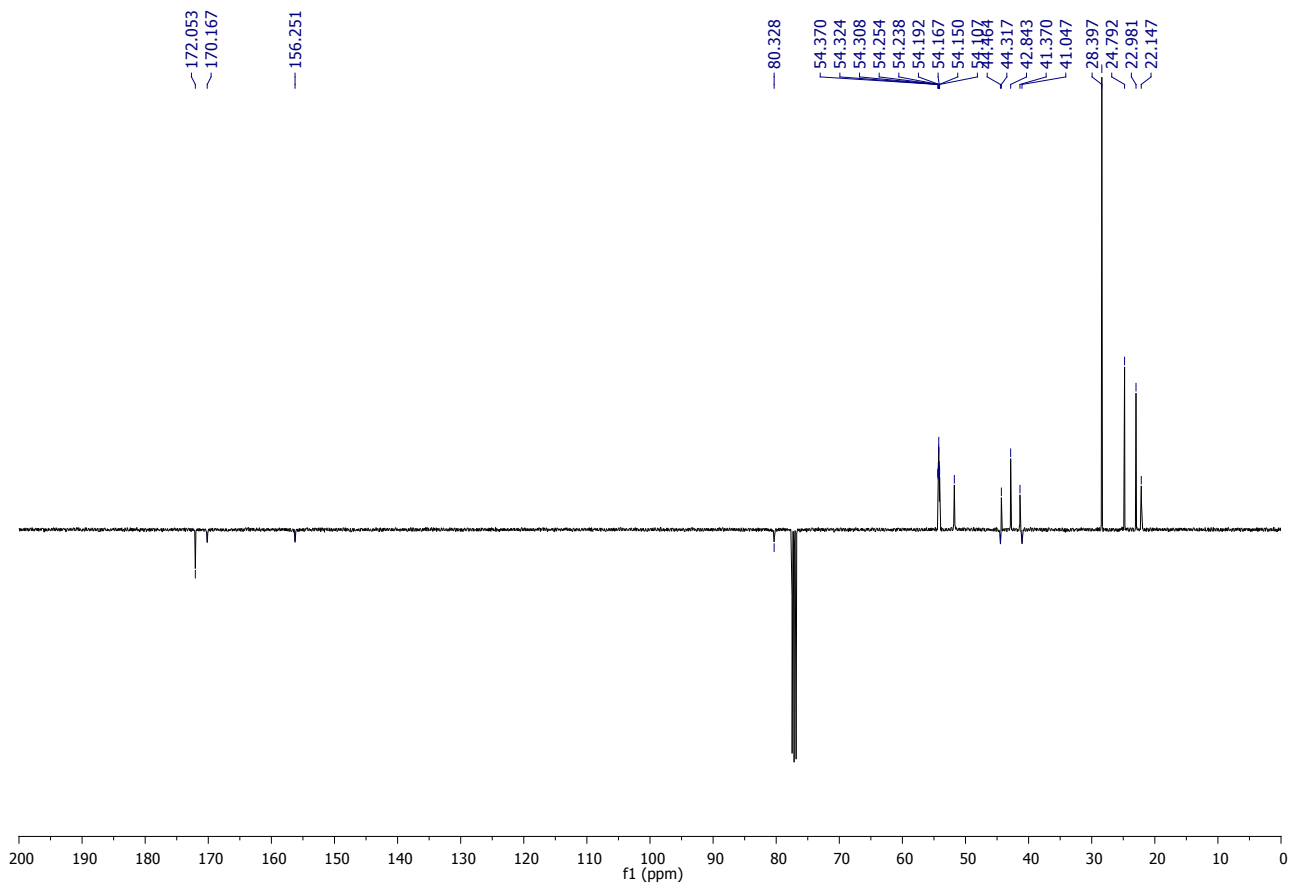

<sup>31</sup>P NMR spectrum

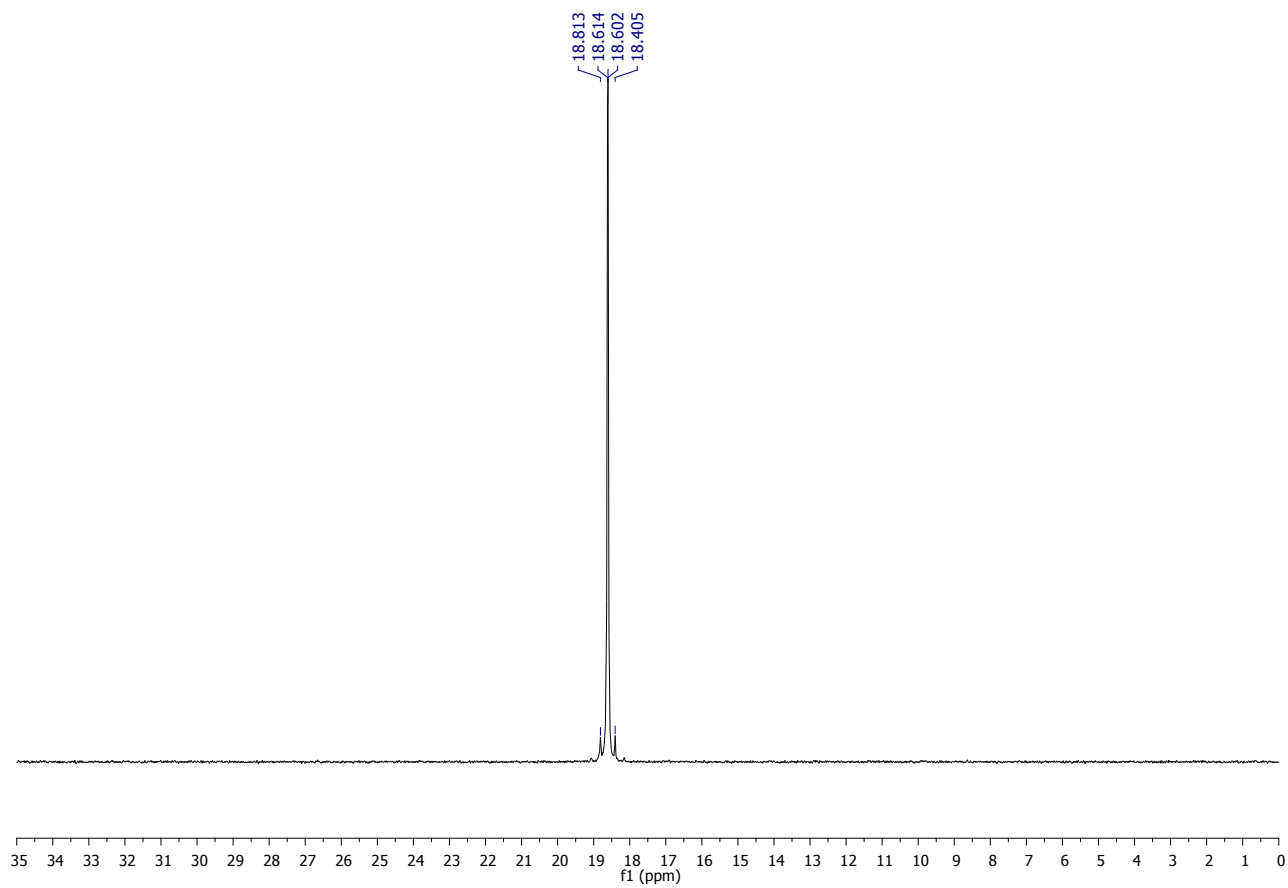

# Dimethyl (E)-{1-[N-(tert-butoxycarbonyl)glycyl-L-leucylamido]prop-1-en-1-yl}phosphonate (E-11)

## <sup>1</sup>H NMR spectrum

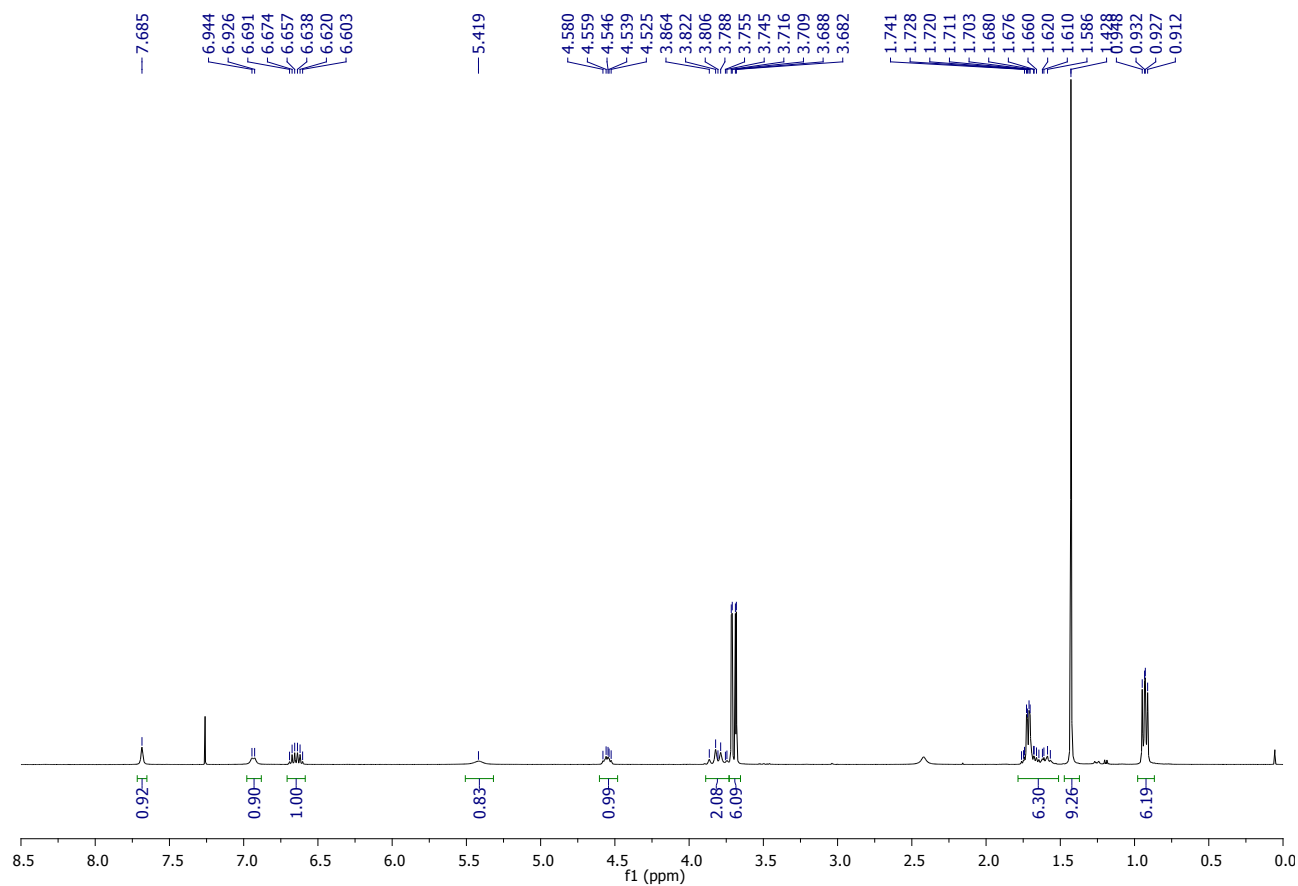

## APTC NMR spectrum

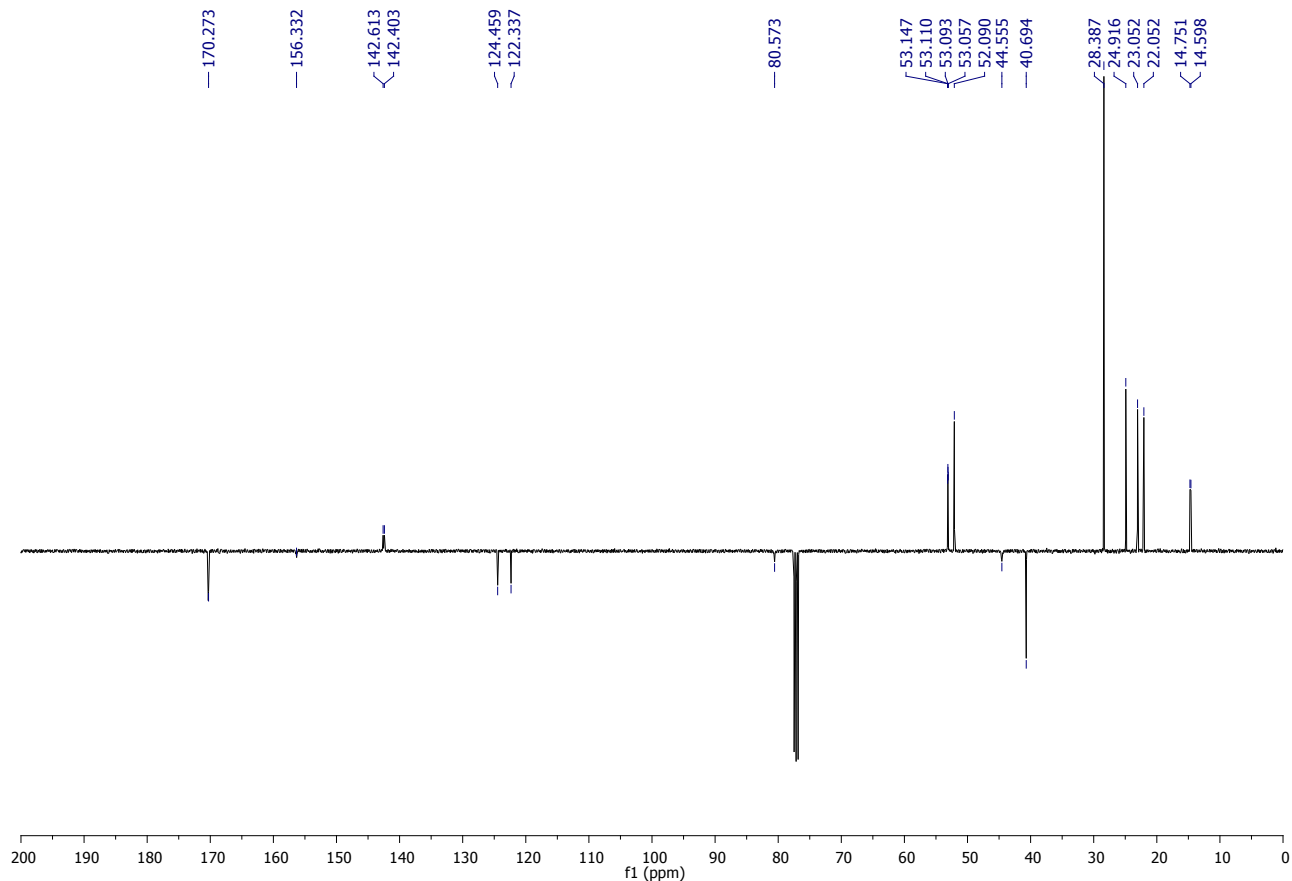

$^{31}\text{P}$  NMR spectrum

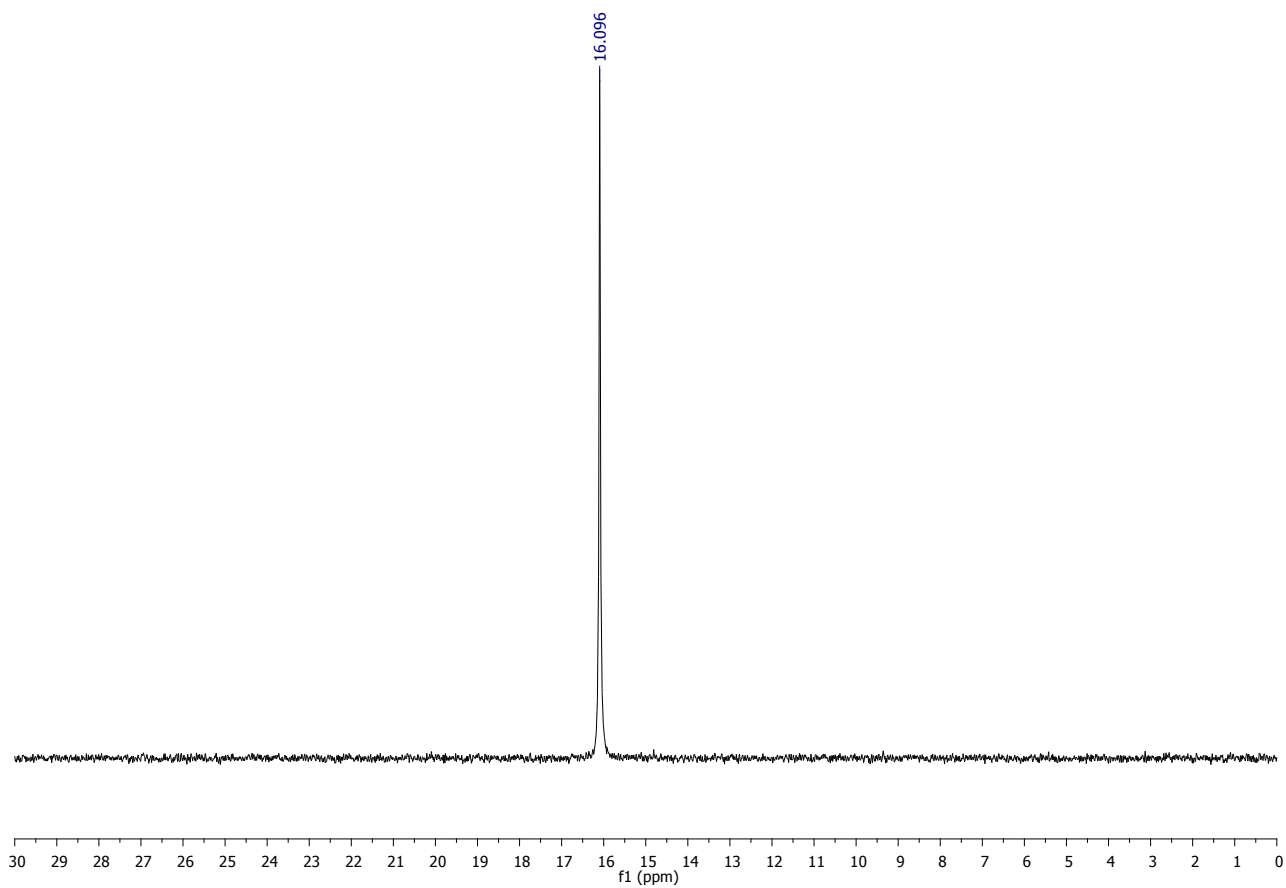

# Dimethyl (Z)-{1-[N-(tert-butoxycarbonyl)glycyl-L-leucylamido]prop-1-en-1-yl}phosphonate (Z-11)

## <sup>1</sup>H NMR spectrum

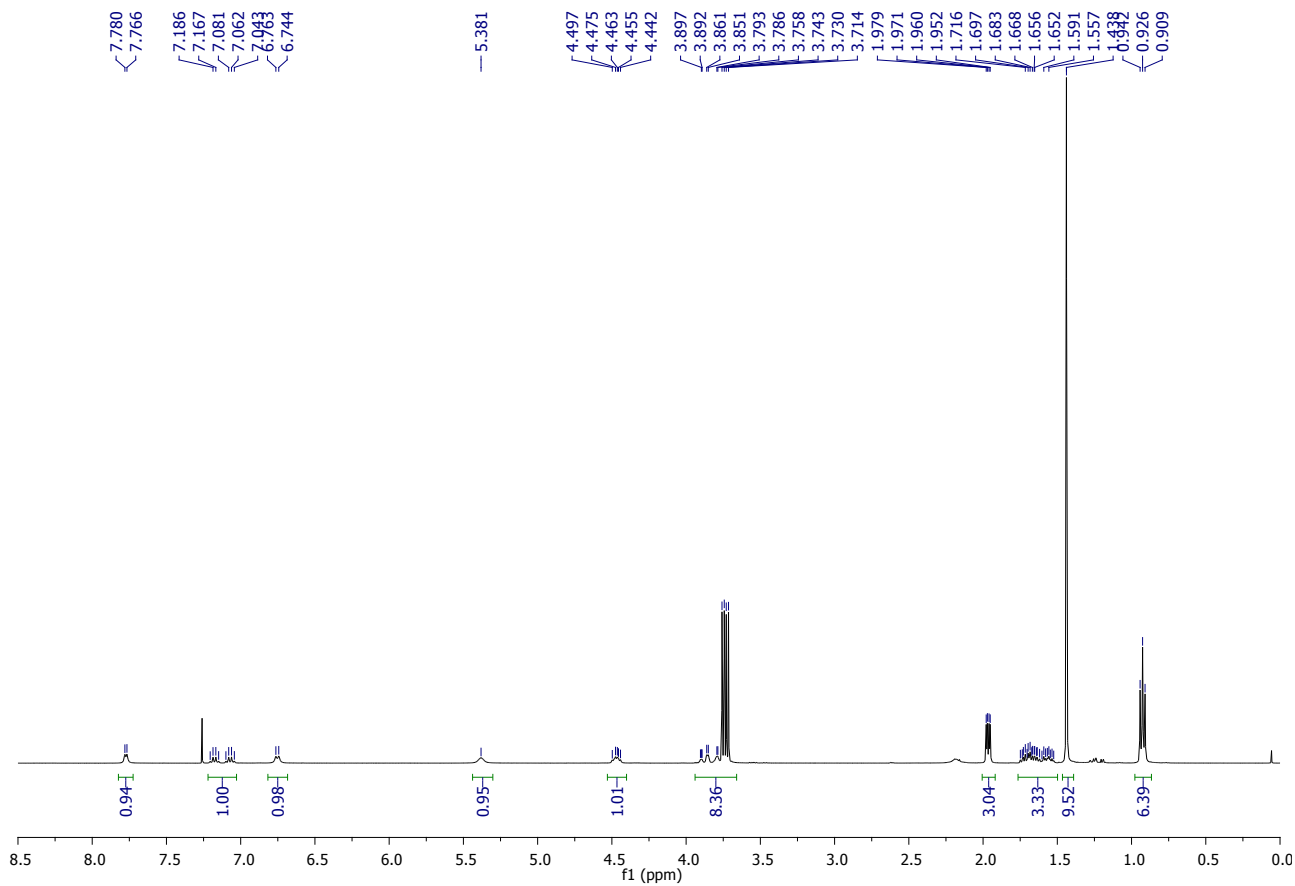

## APTC NMR spectrum

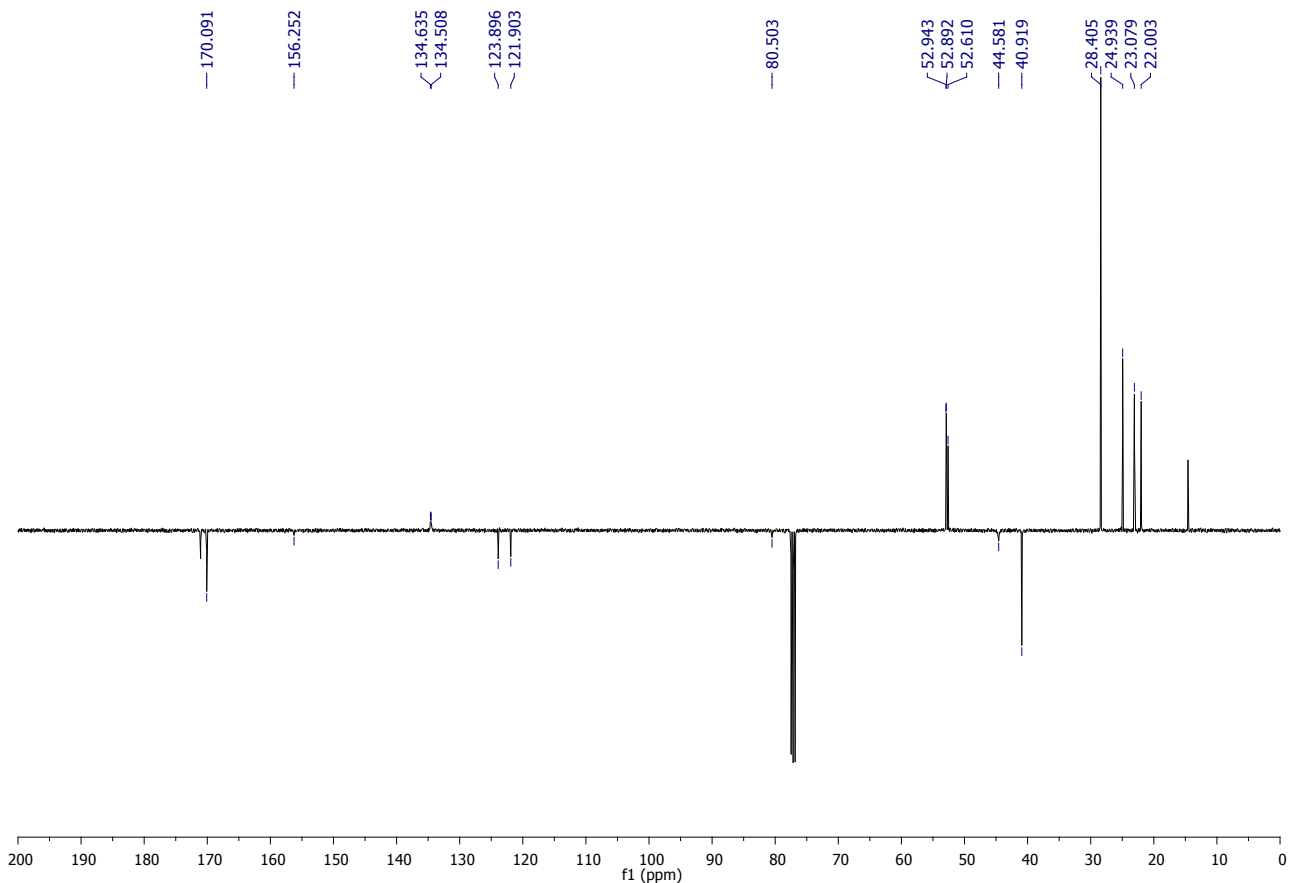



<sup>31</sup>P NMR spectrum

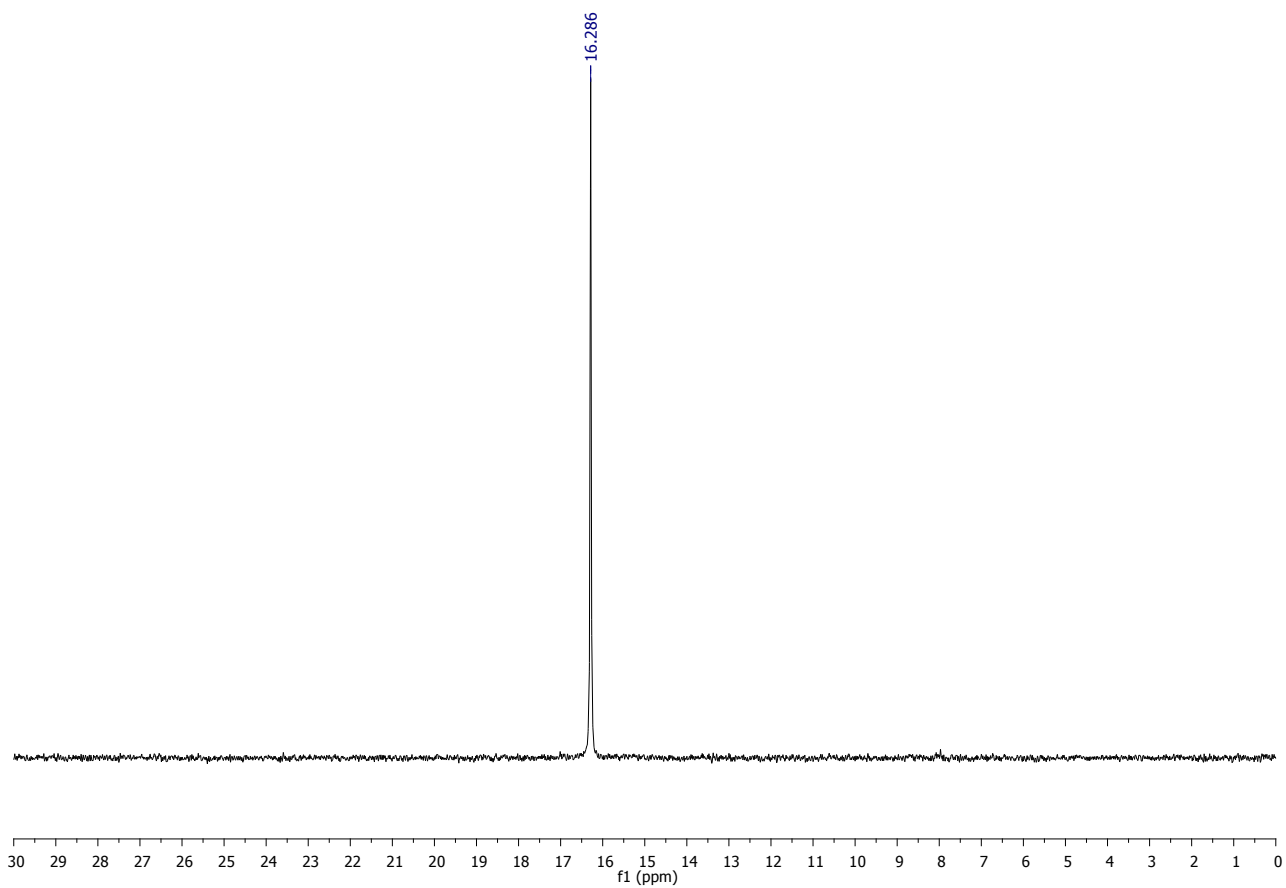

# Dimethyl (E)-{1-[N-(tert-butoxycarbonyl)glycyl-L-leucylamido]-2-phenylethen-1-yl}phosphonate (E-12)

## <sup>1</sup>H NMR spectrum

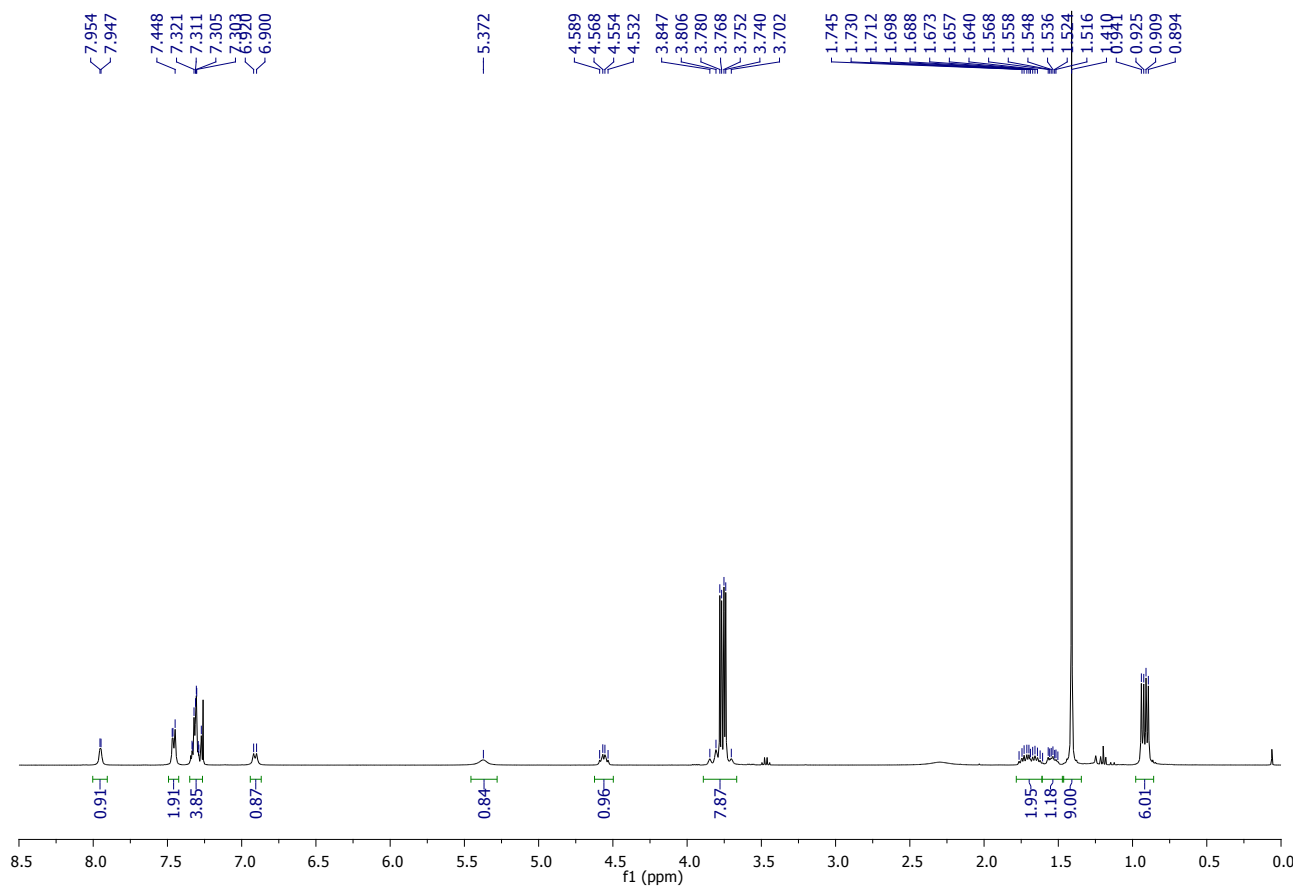

## APTC NMR spectrum

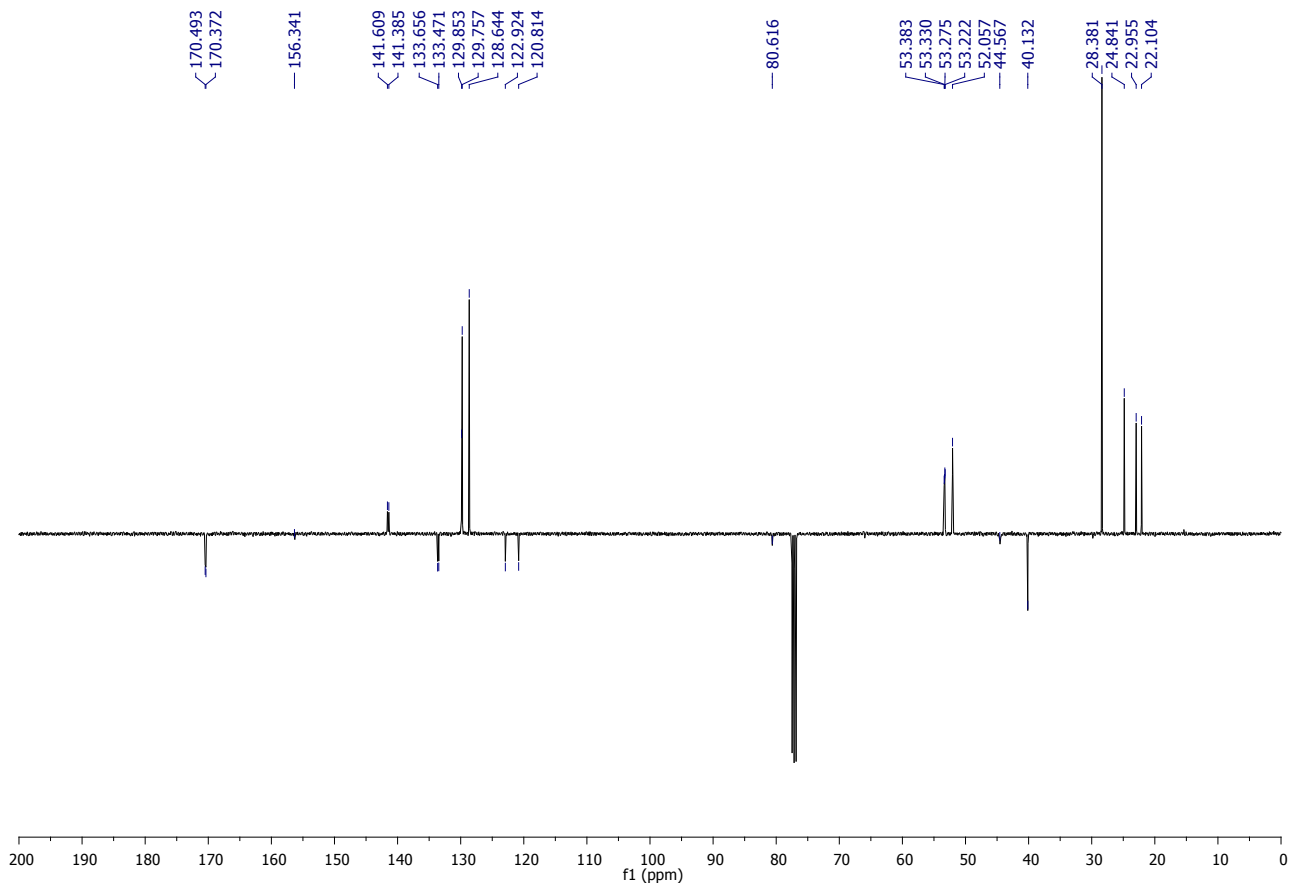

$^{31}\text{P}$  NMR spectrum

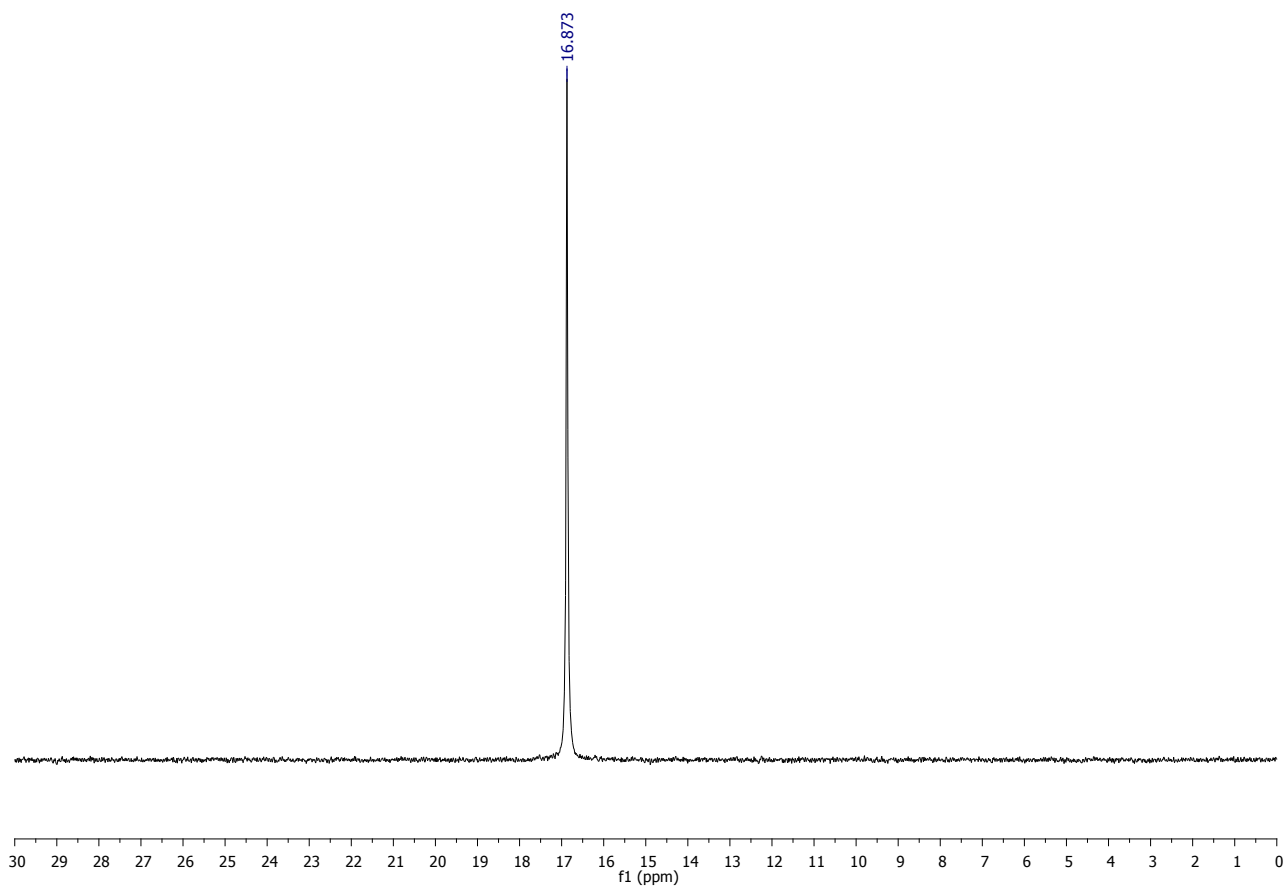

**Dimethyl (Z)-{1-[N-(tert-butoxycarbonyl)glycyl-L-leucylamido]-2-phenylethen-1-yl}phosphonate (Z-12)**

<sup>1</sup>H NMR spectrum

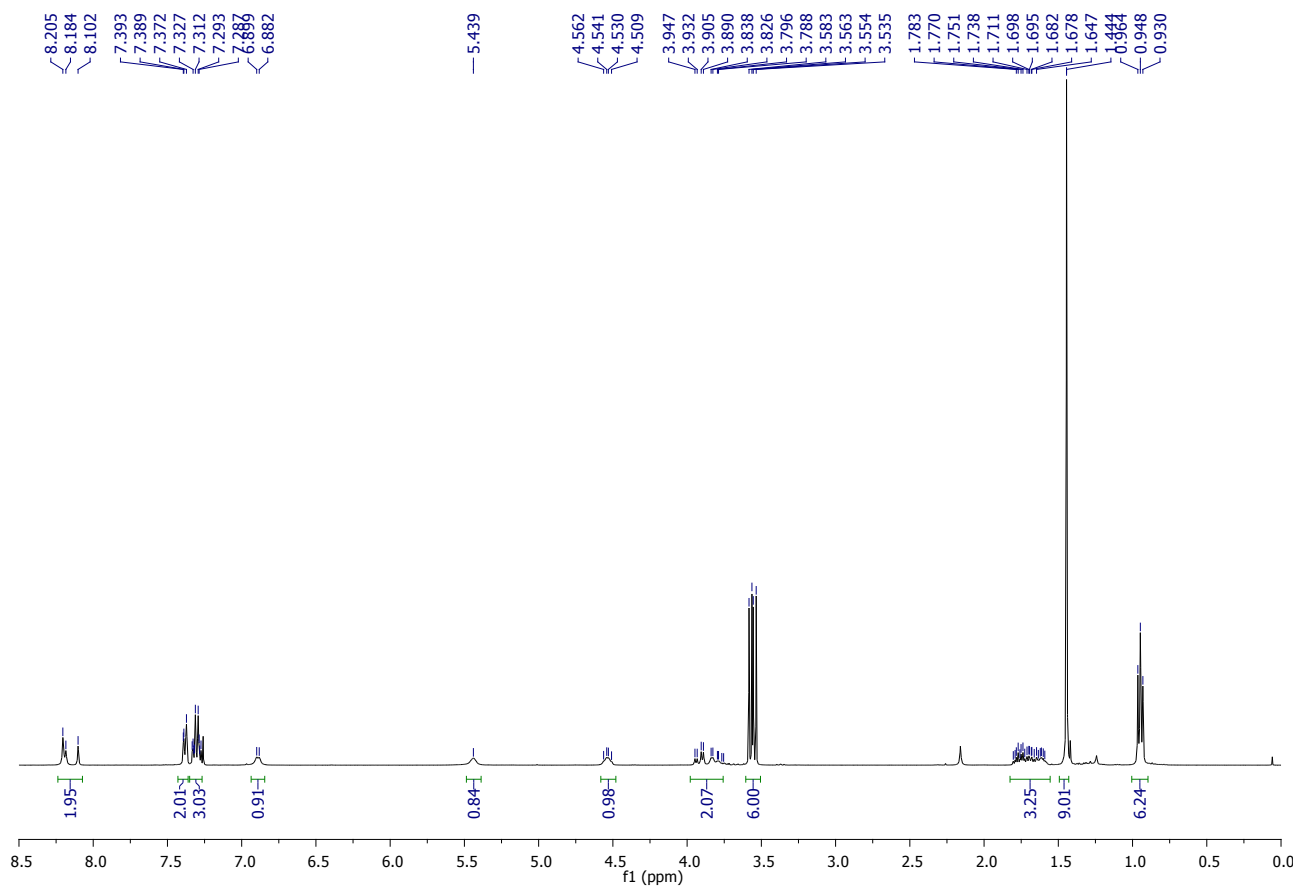

APTC NMR spectrum

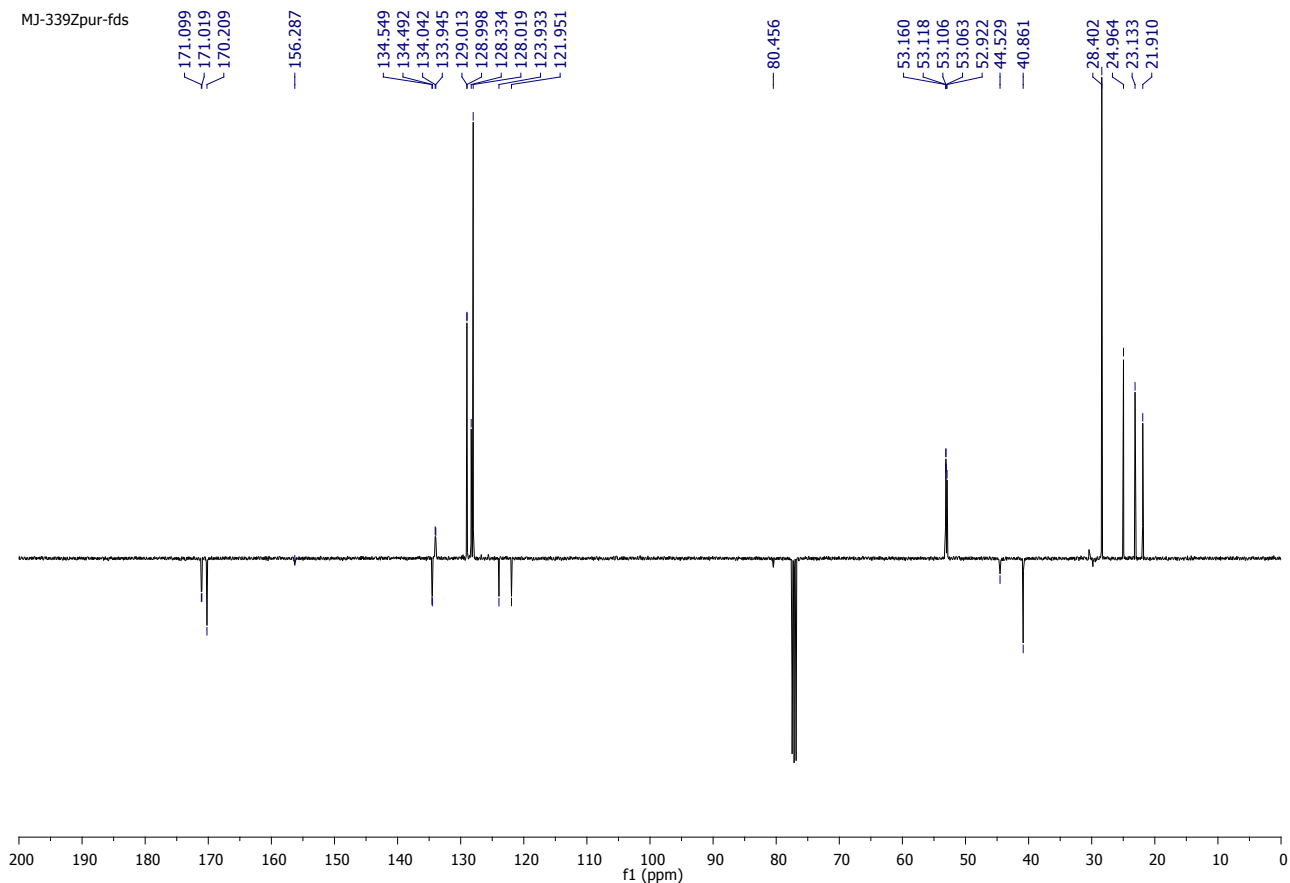

<sup>31</sup>P NMR spectrum

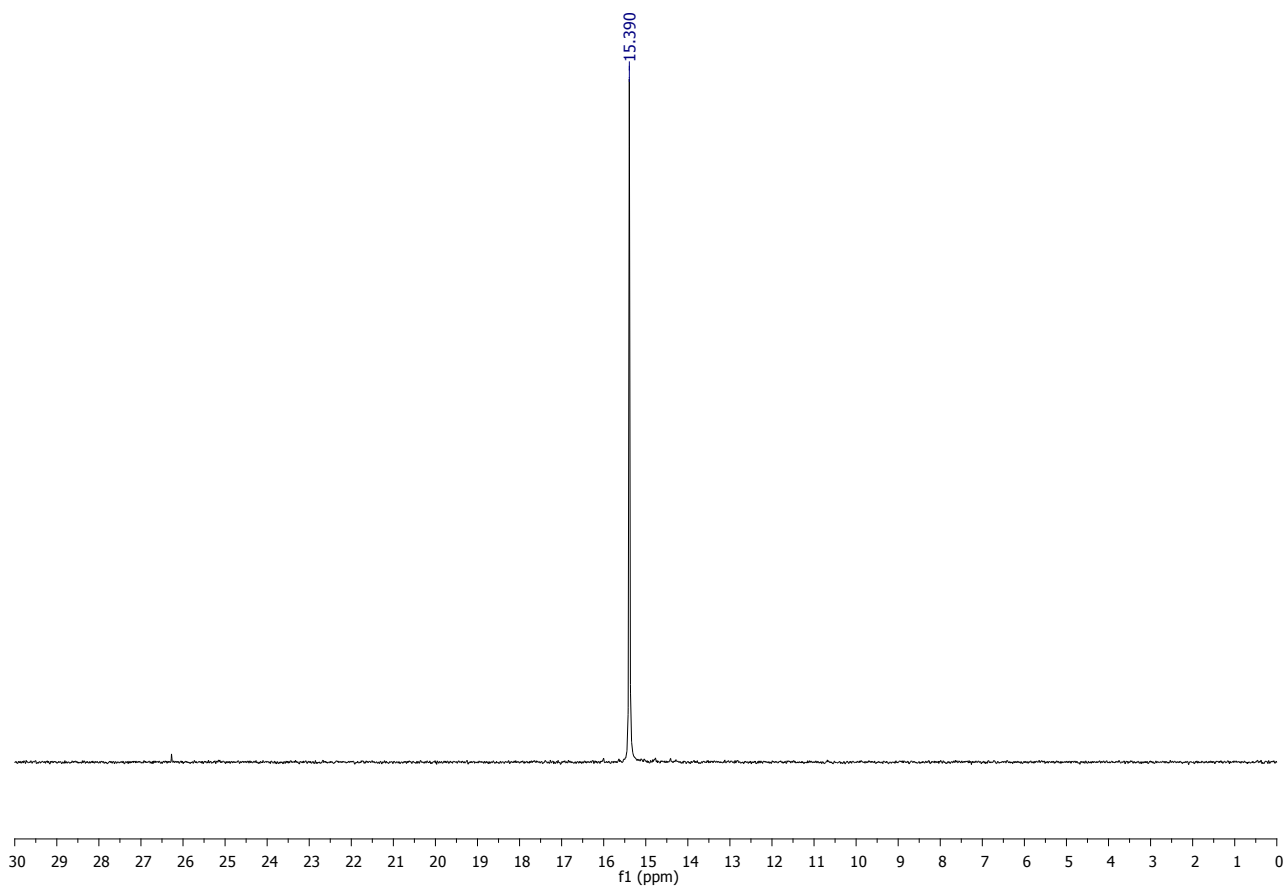

**(E)-[1-(glycyl-L-leucylamido)prop-1-en-1-yl]phosphonic acid monomethyl ester (13)**

<sup>1</sup>H NMR spectrum

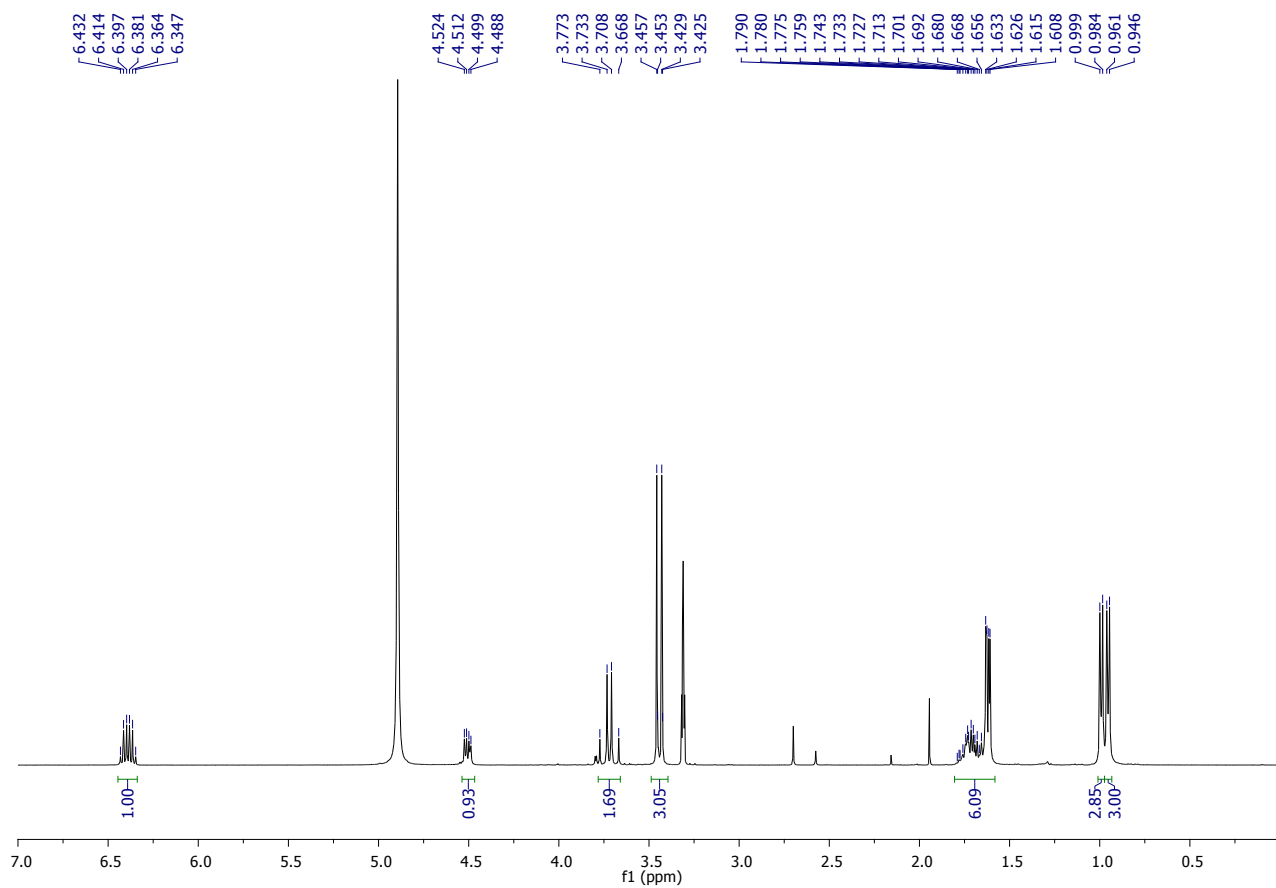

APTC NMR spectrum

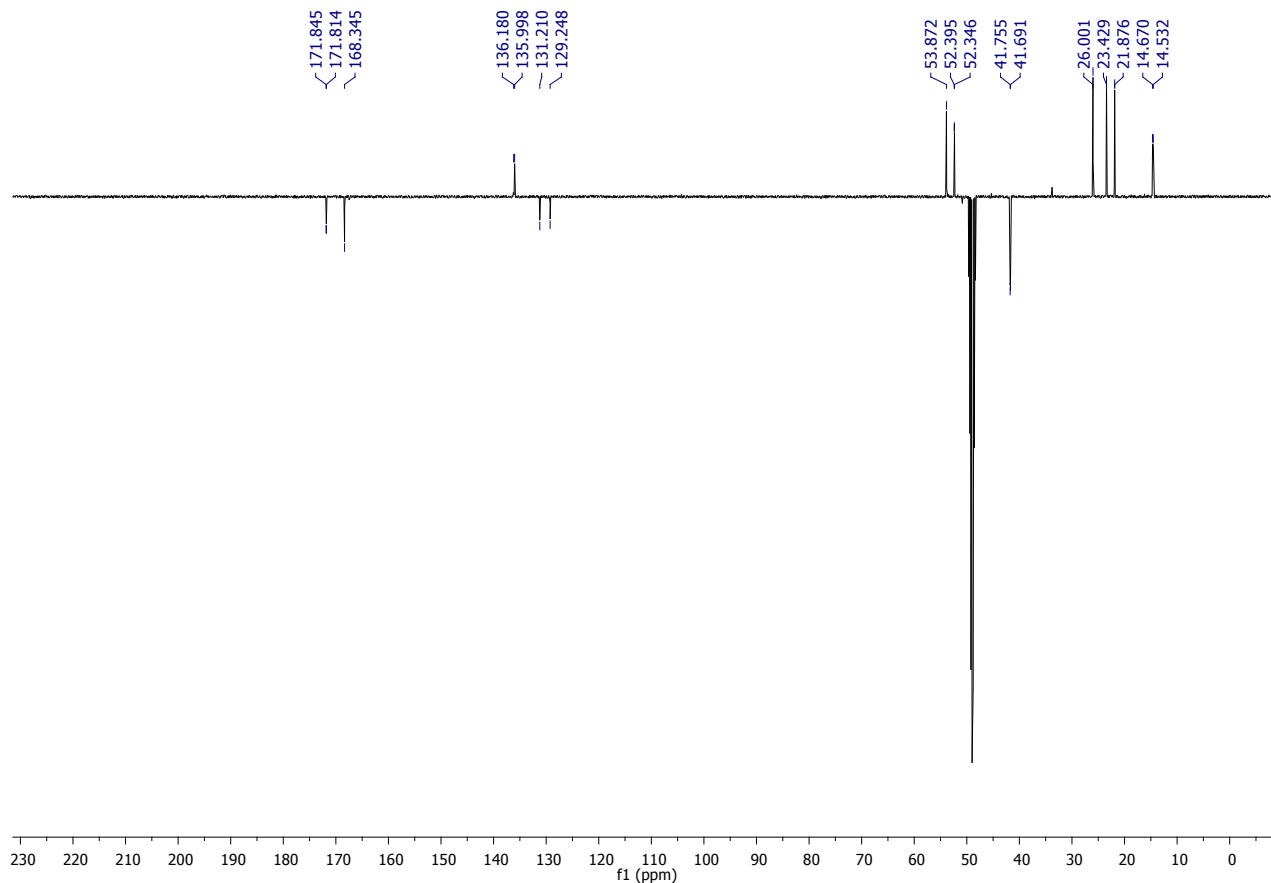

<sup>31</sup>P NMR spectrum

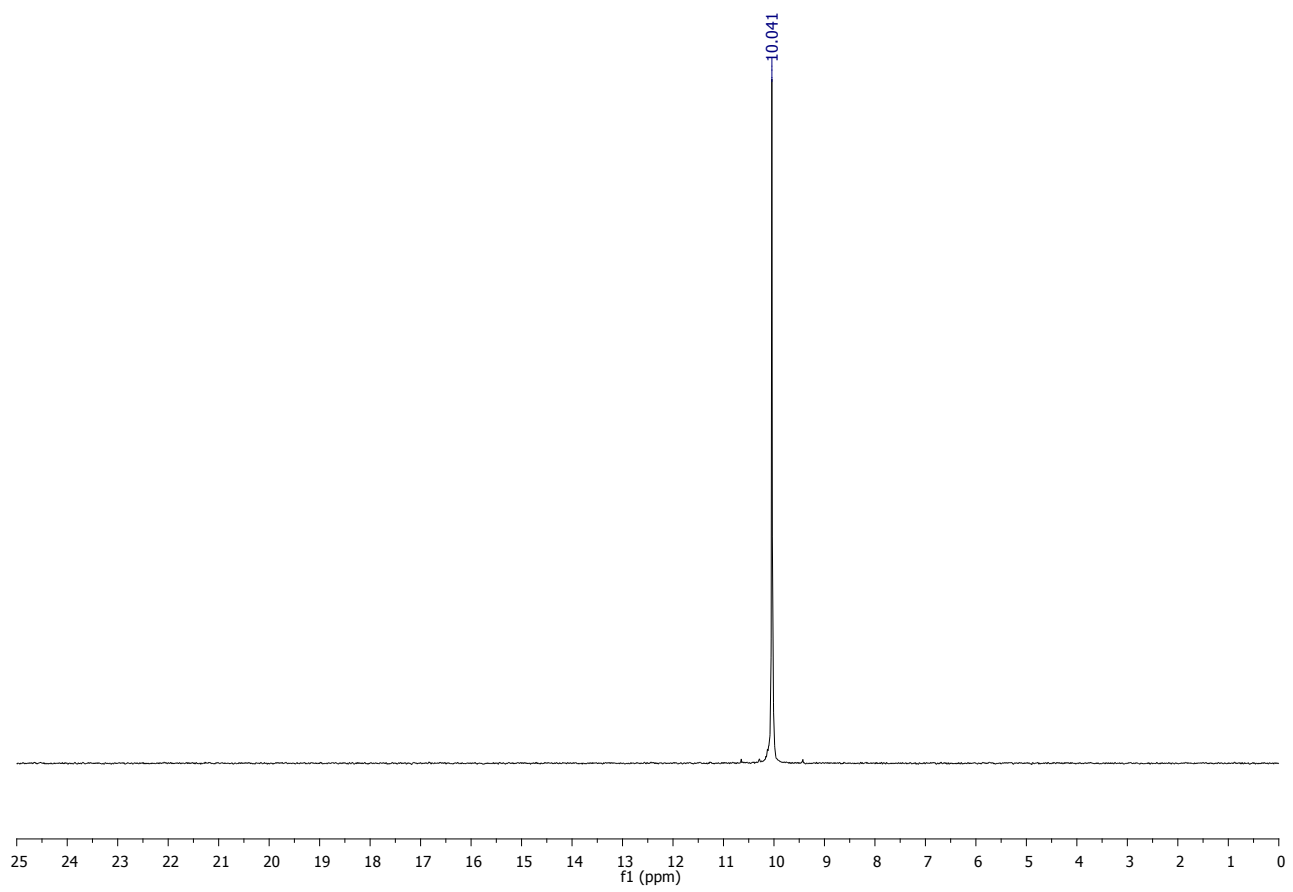

**(E)-[1-(glycyl-L-leucylamido)-2-phenylethen-1-yl]phosphonic acid monomethyl ester (14)**

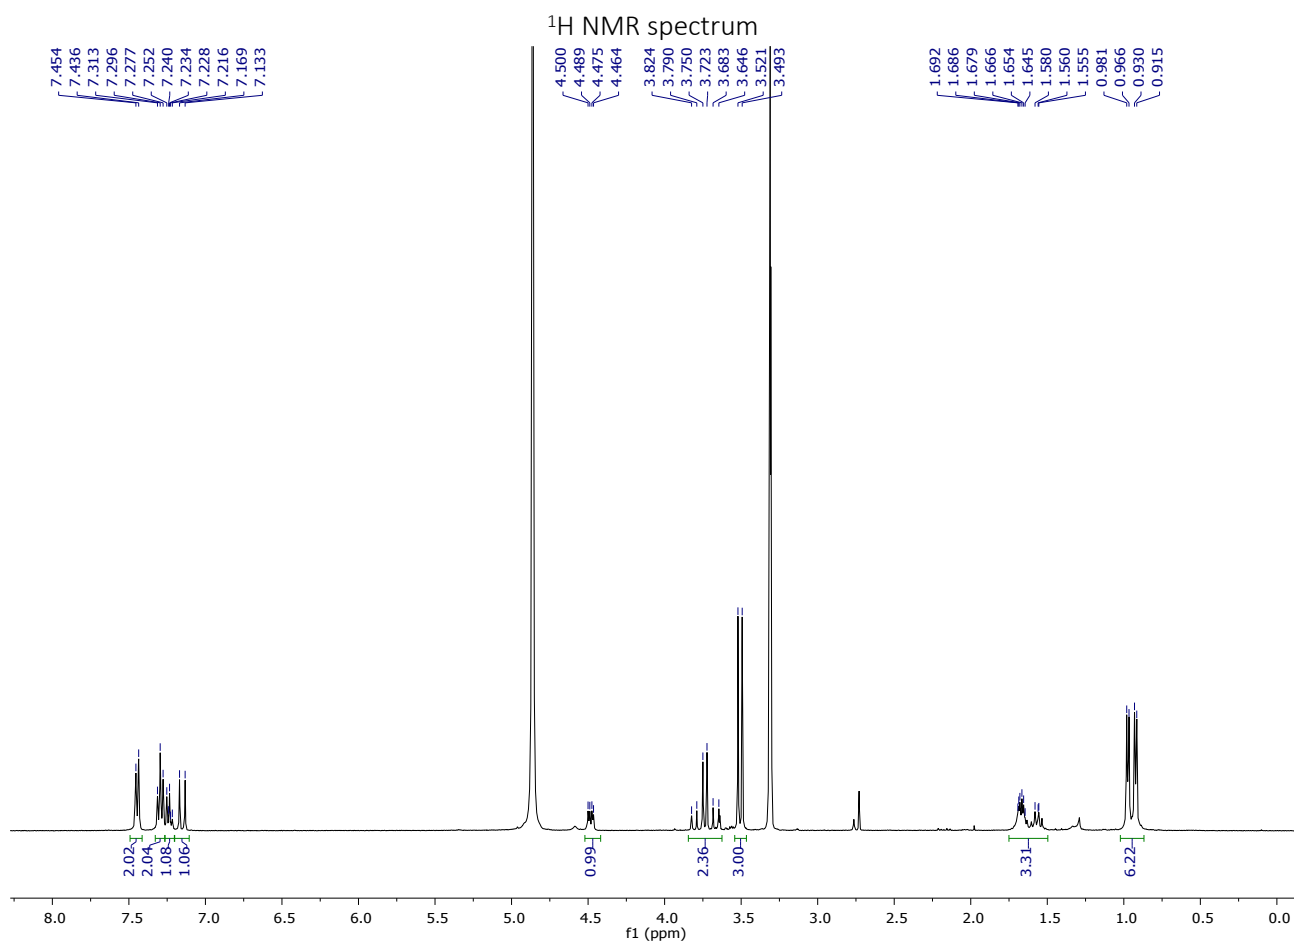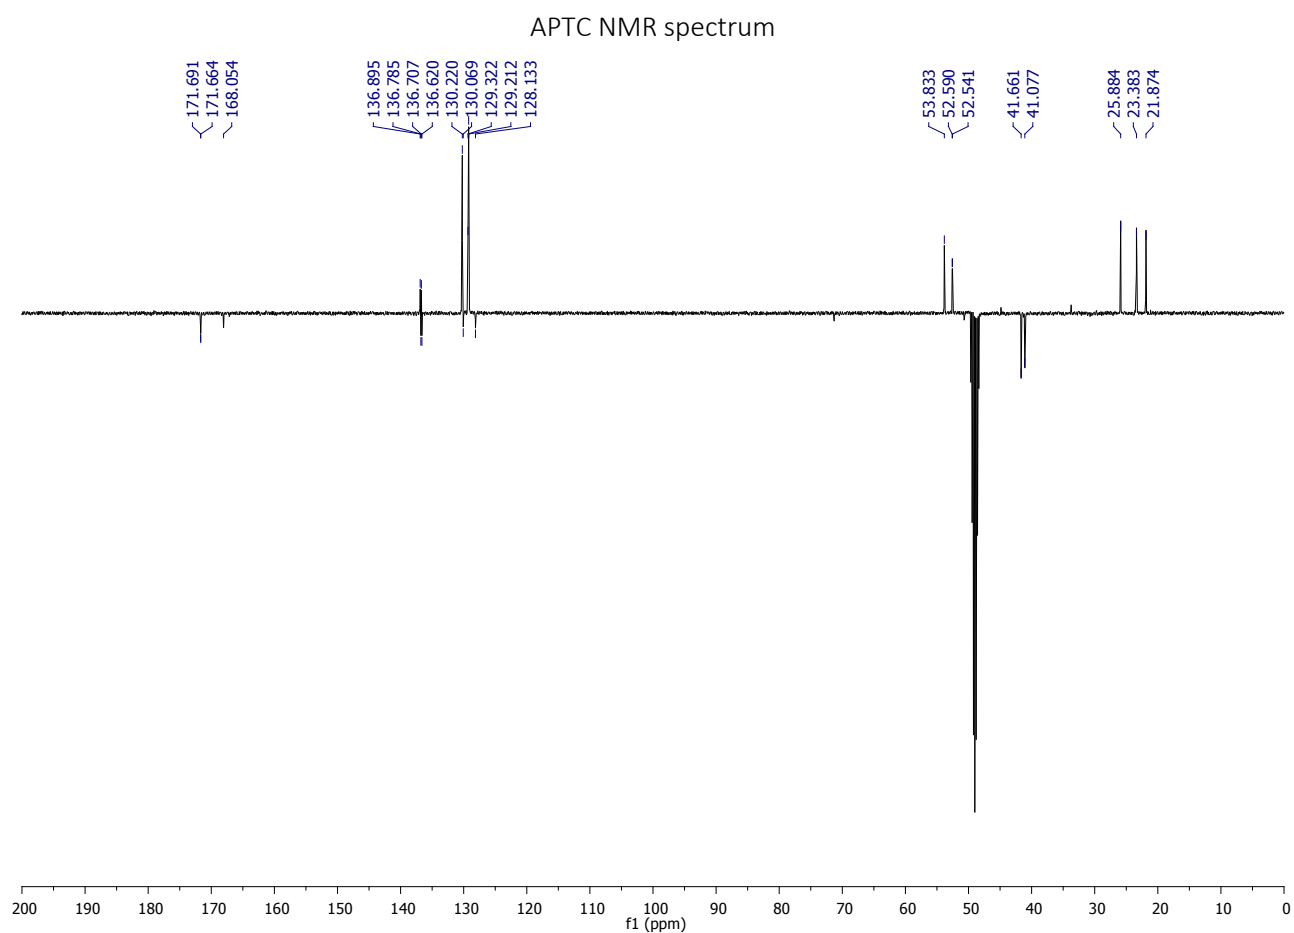



<sup>31</sup>P NMR spectrum

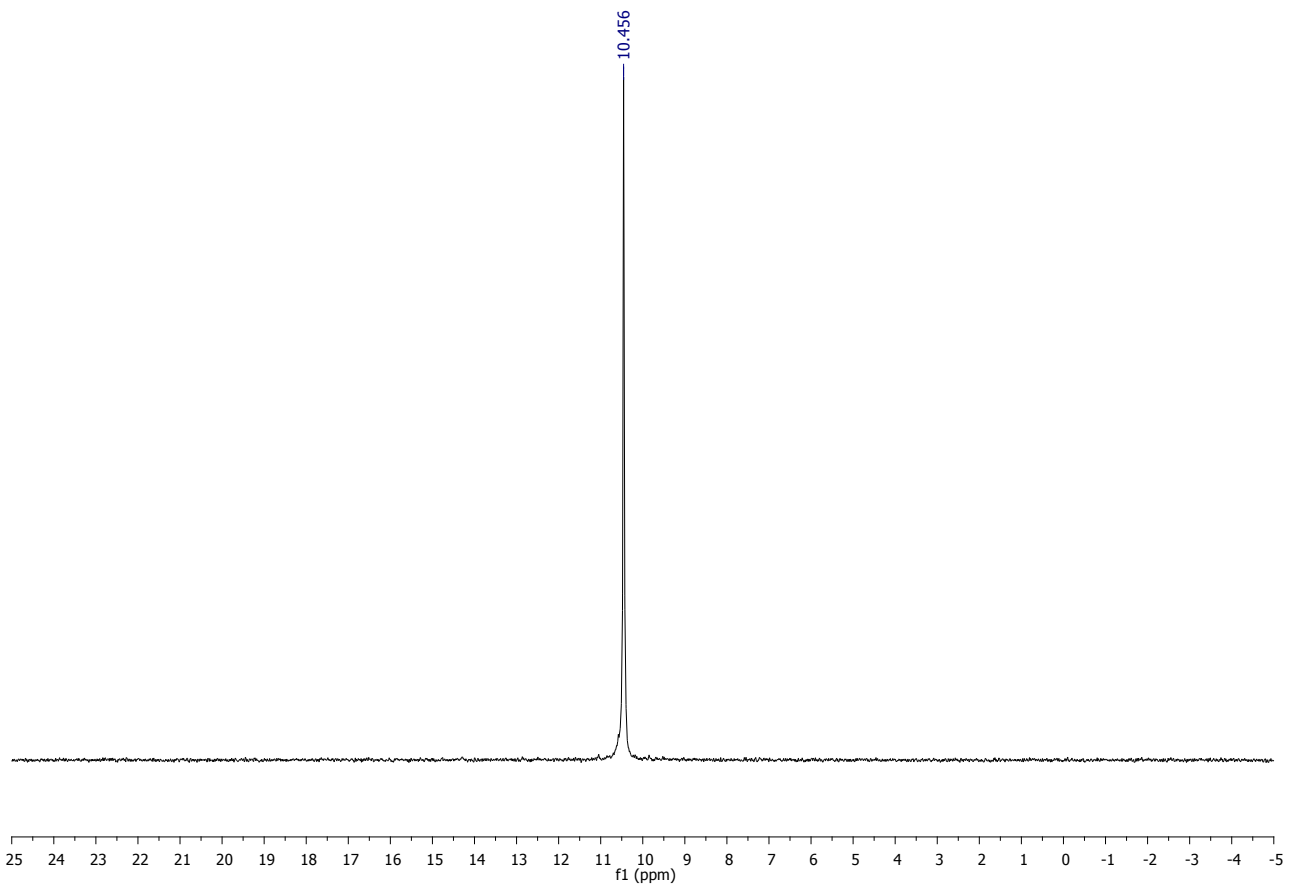

# Tetraethyl (benzyloxycarbonylaminoethyl)bisphosphonate (17)

## <sup>1</sup>H NMR spectrum

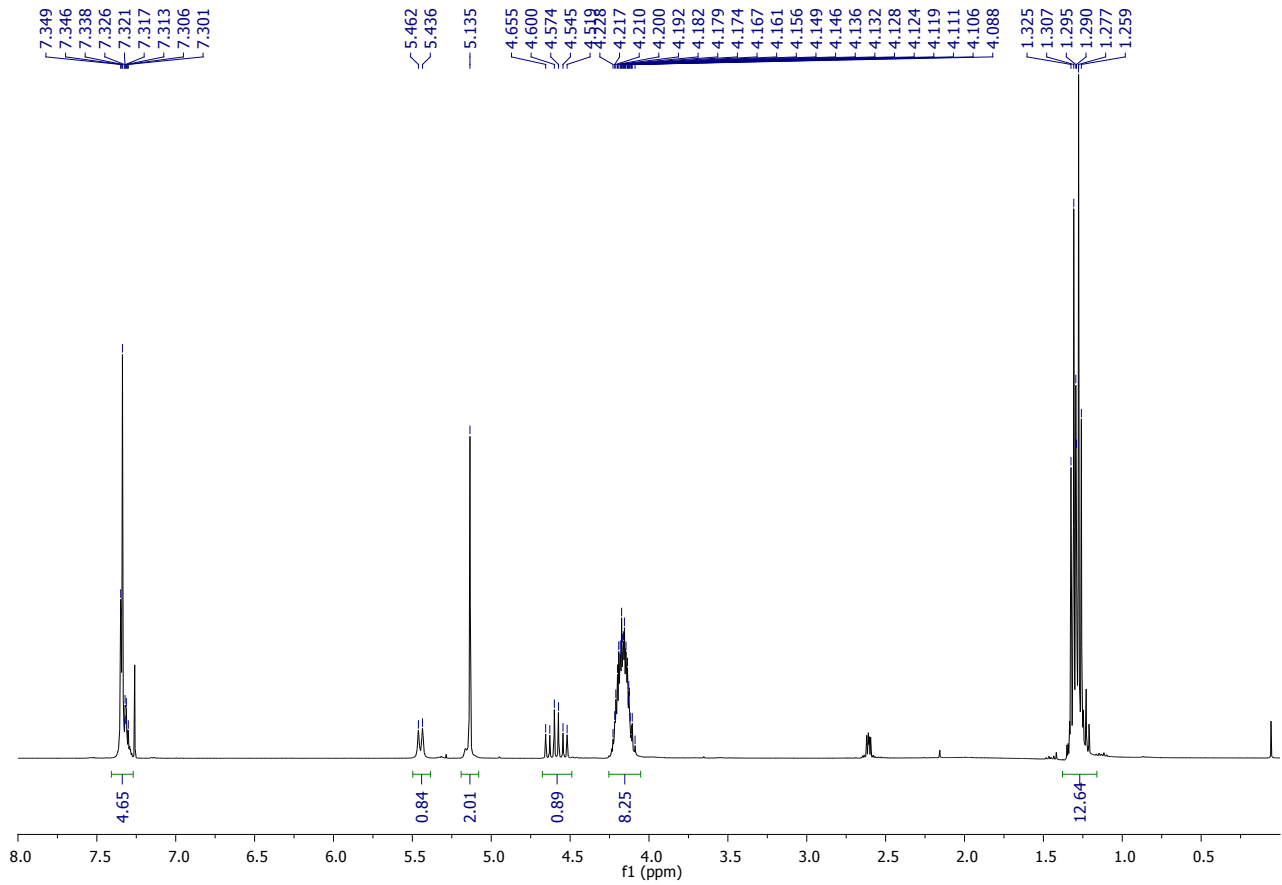

## APTC NMR spectrum

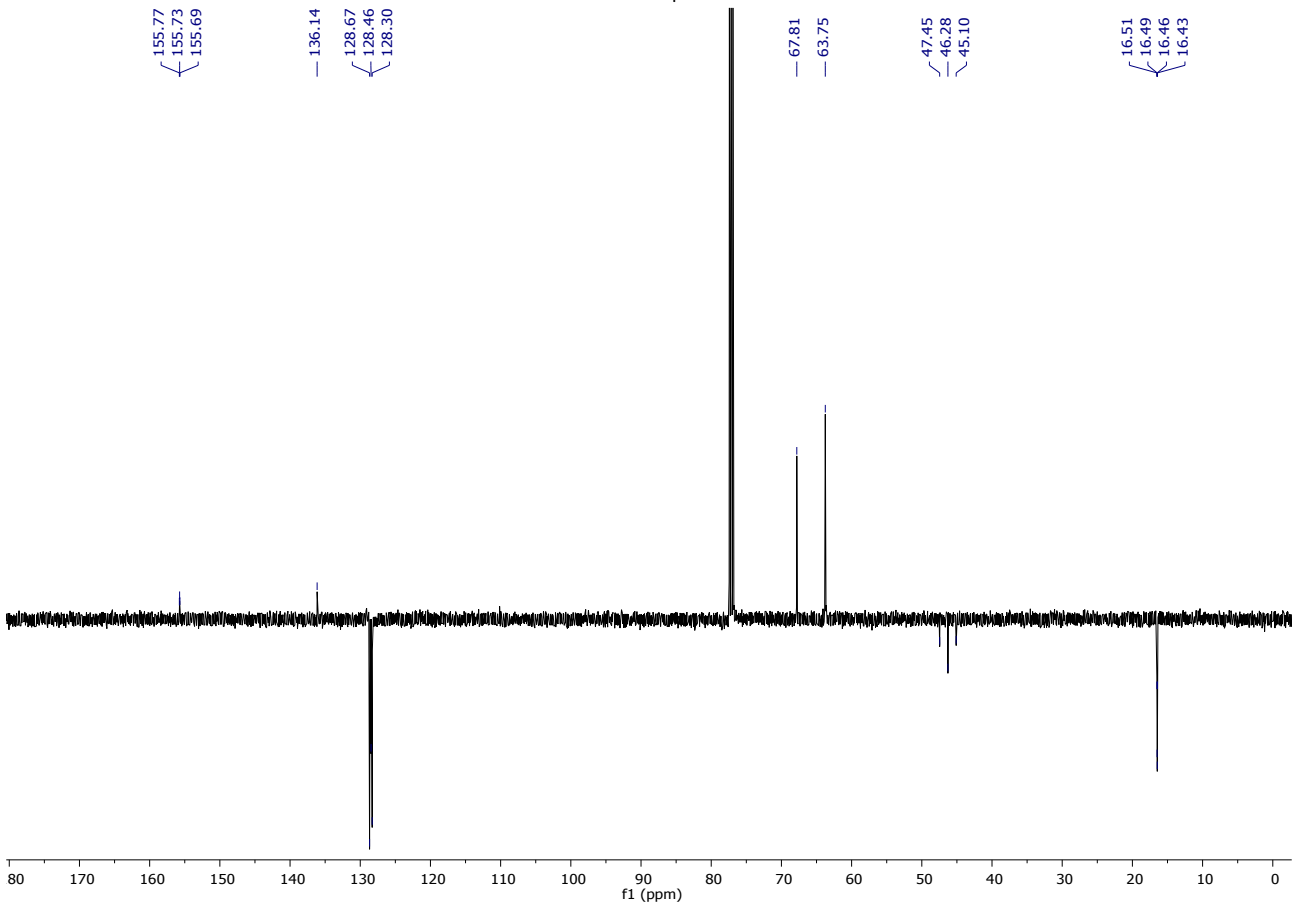

<sup>31</sup>P NMR spectrum

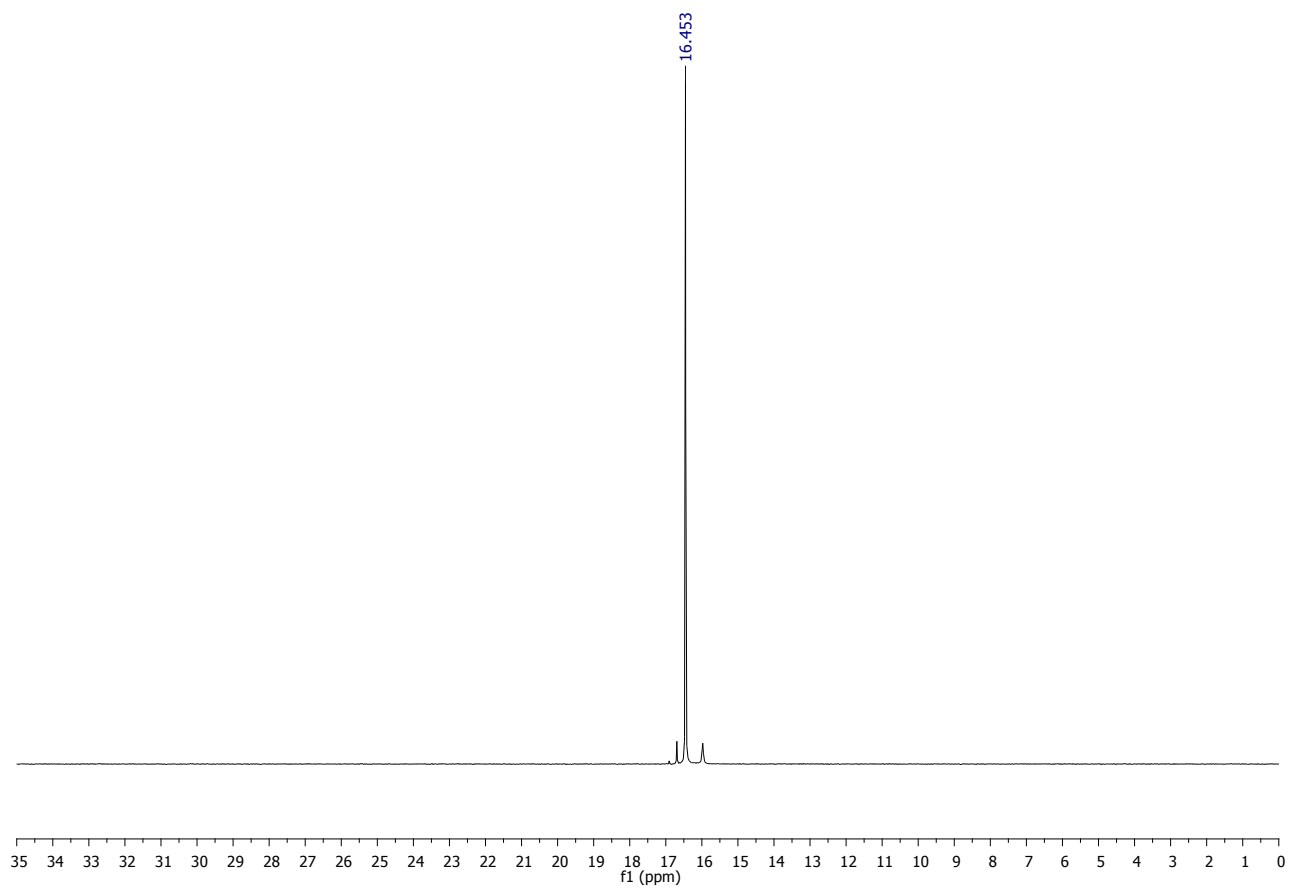

# Tetraethyl [N-(*tert*-butoxycarbonyl)-L-leucylamidomethyl]bisphosphonate (18)

## <sup>1</sup>H NMR spectrum

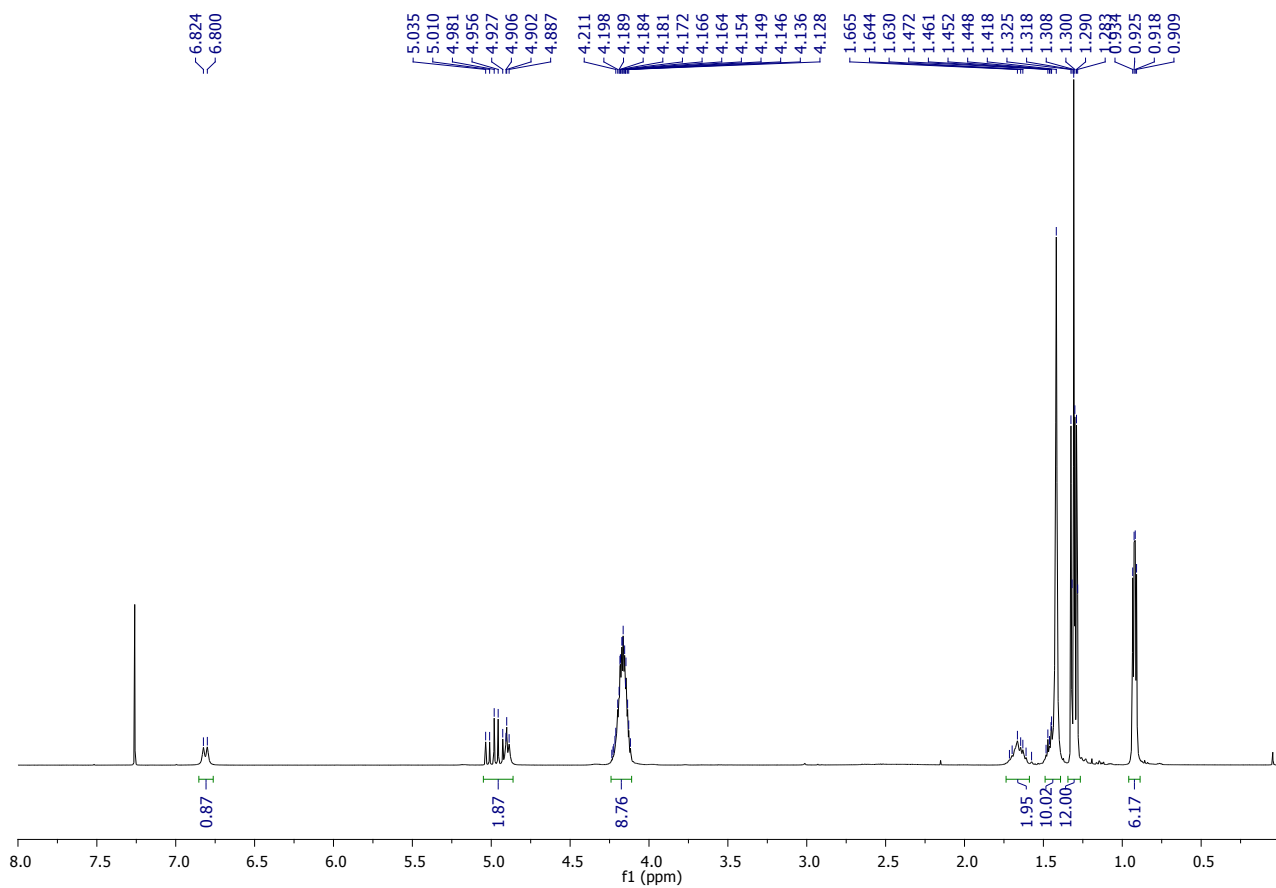

## APTC NMR spectrum

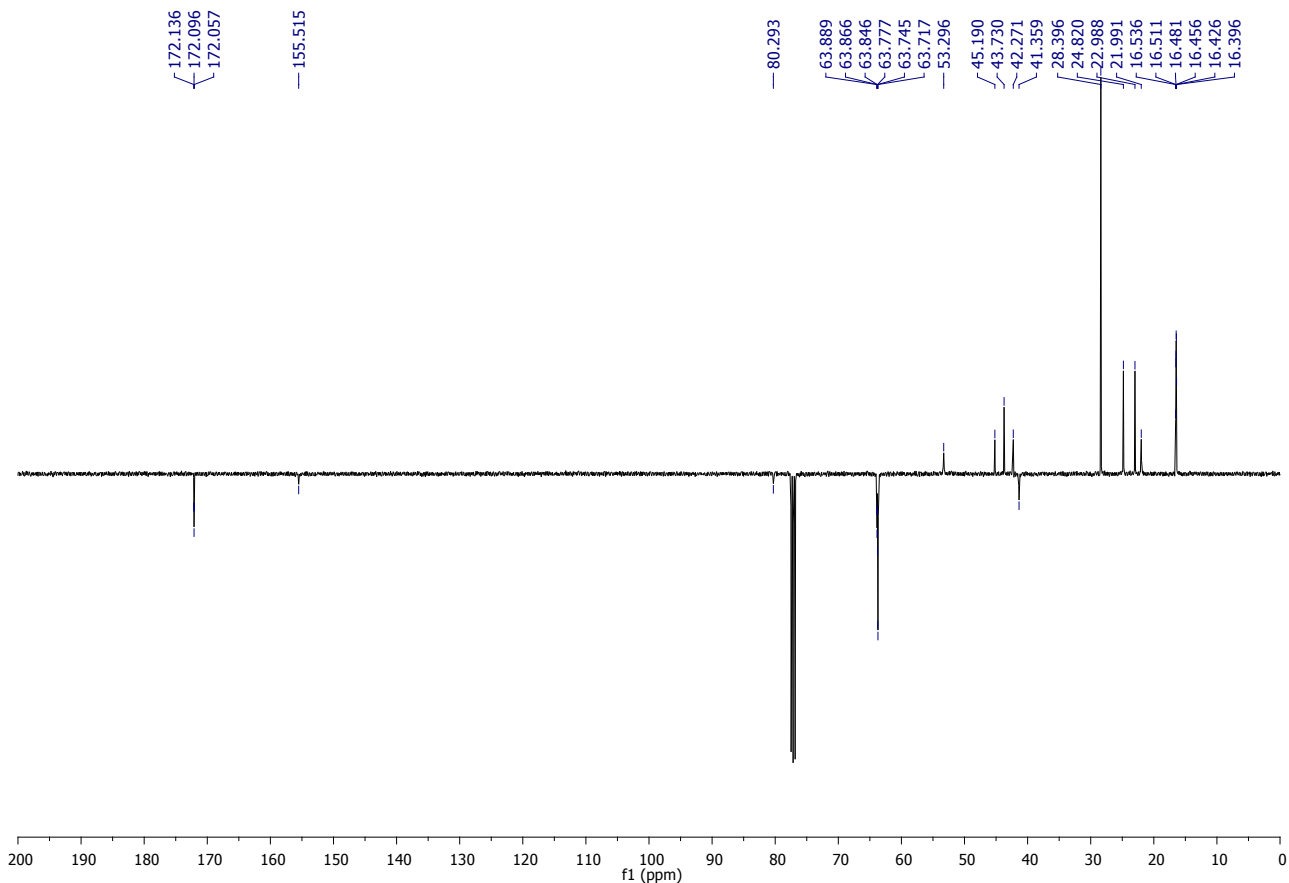

<sup>31</sup>P NMR spectrum

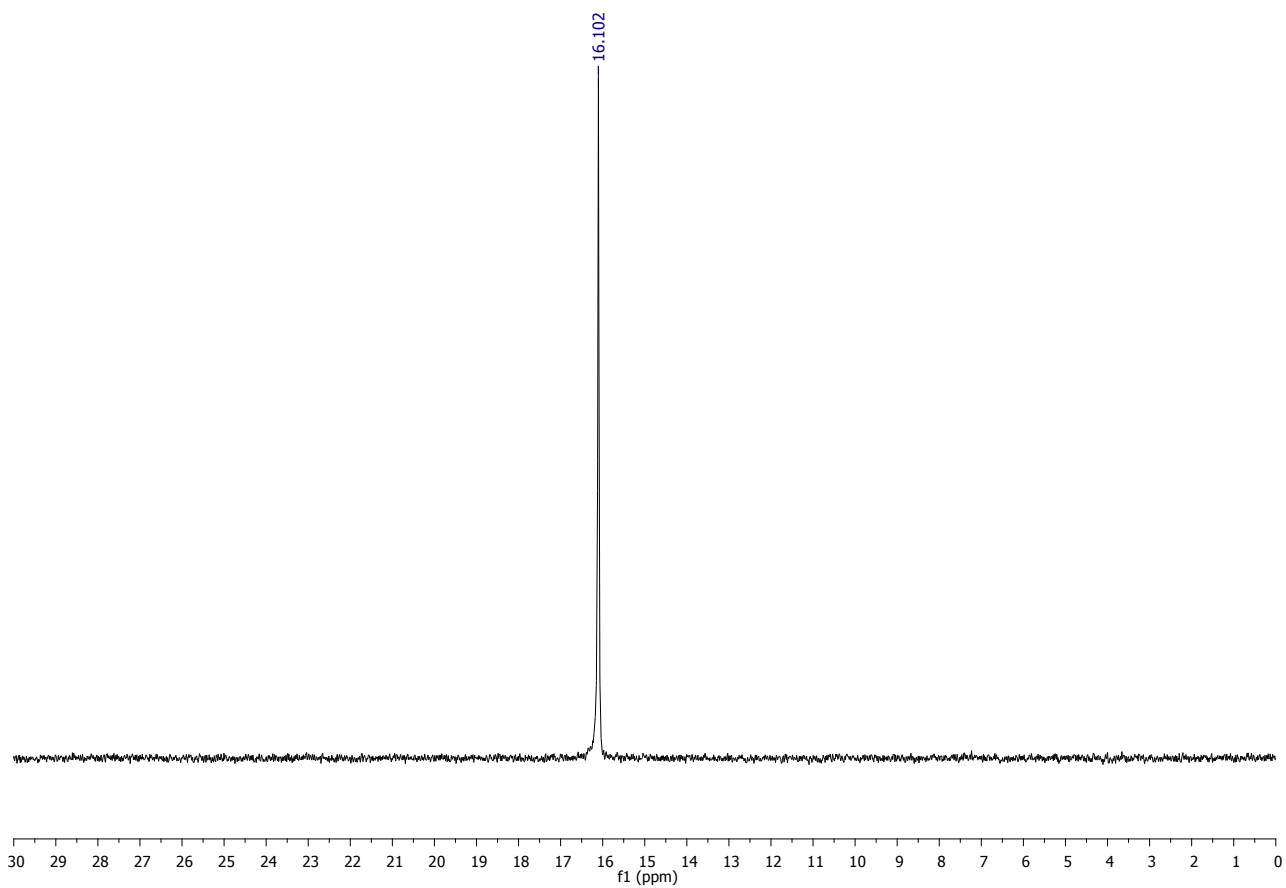

Tetraethyl [N-(tert-butoxycarbonyl)glycyl-L-leucylamidomethyl]bisphosphonate (19)

<sup>1</sup>H NMR spectrum

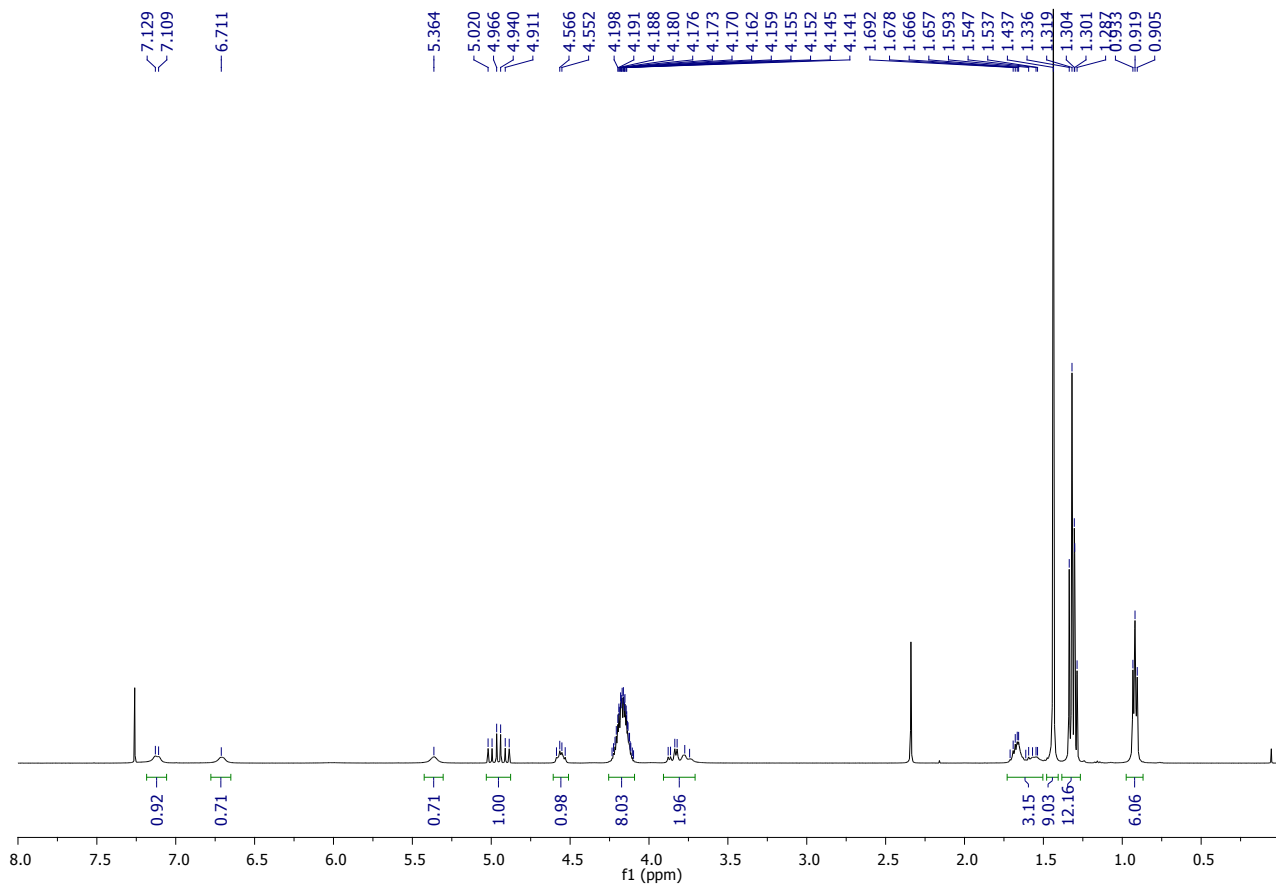

APTC NMR spectrum

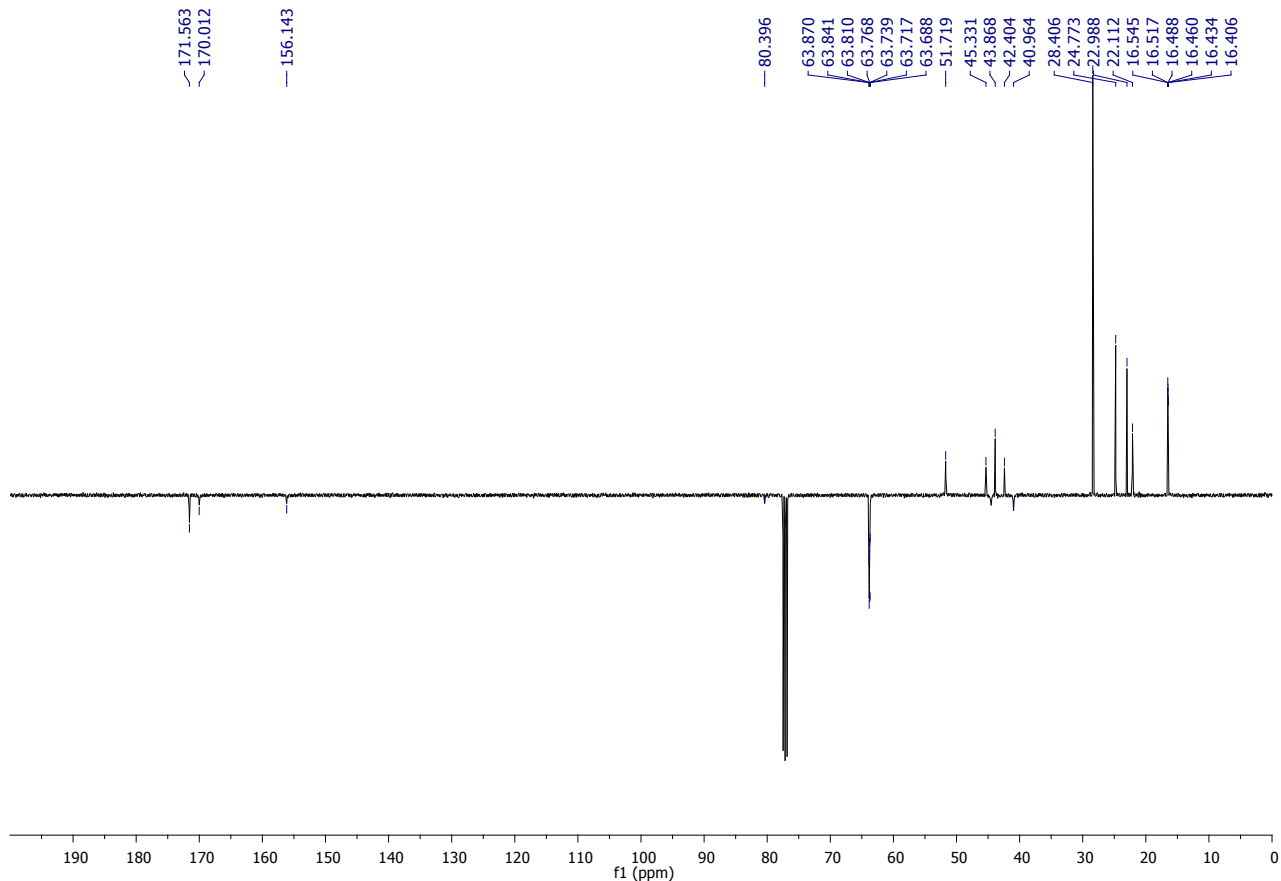

<sup>31</sup>P NMR spectrum

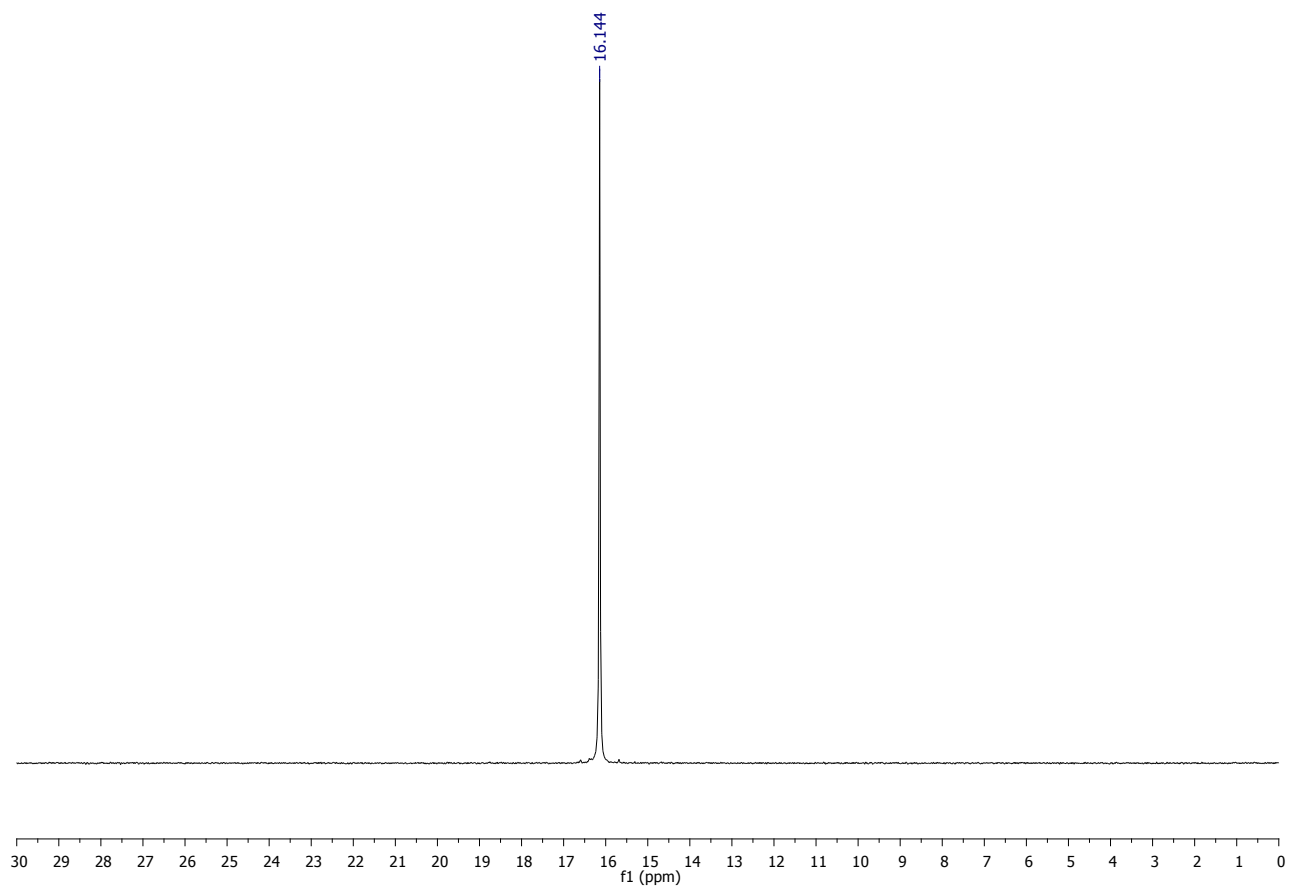

# Diethyl {1-[N-(*tert*-butoxycarbonyl)glycyl-L-leucylamido]ethen-1-yl}phosphonate (20)

## <sup>1</sup>H NMR spectrum

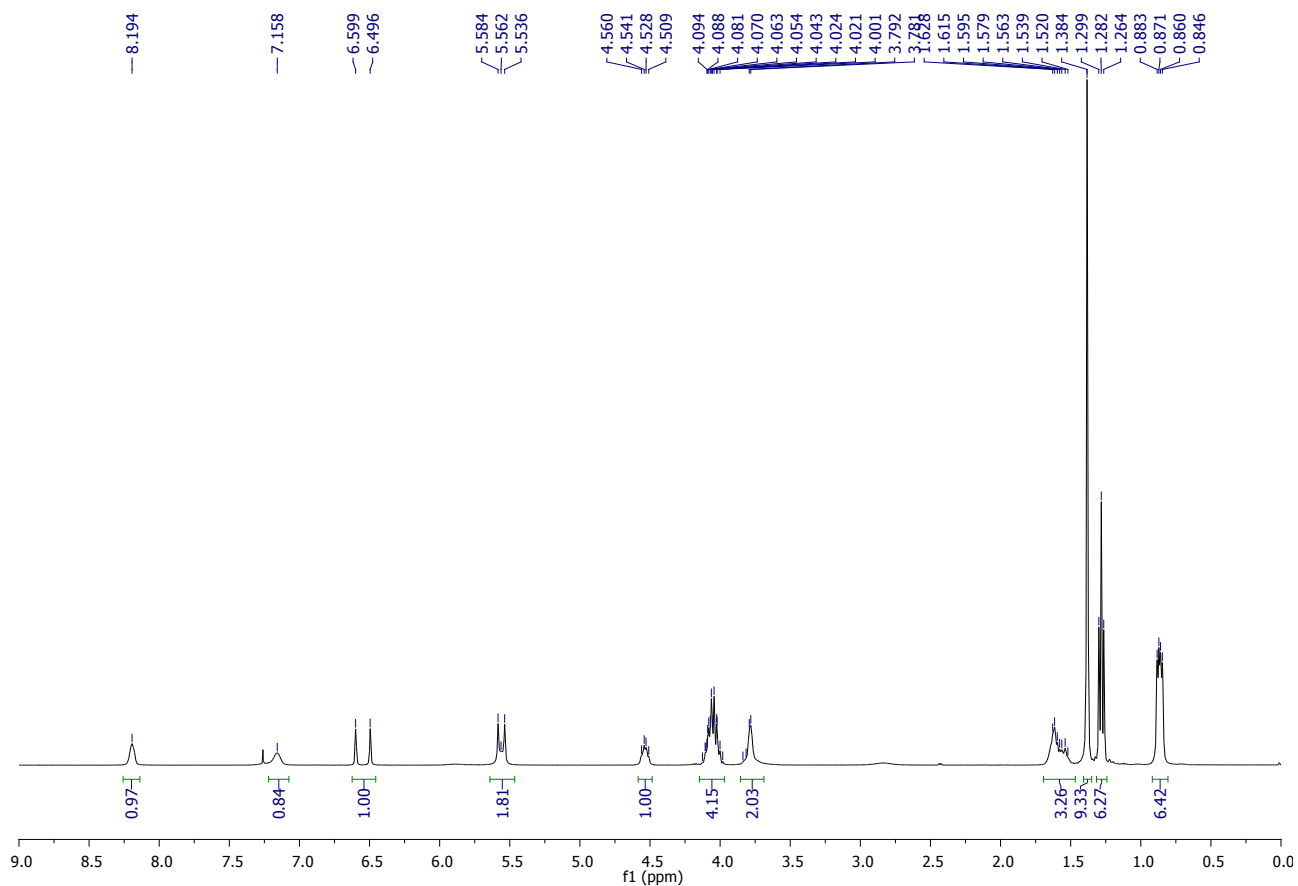

## APTC NMR spectrum

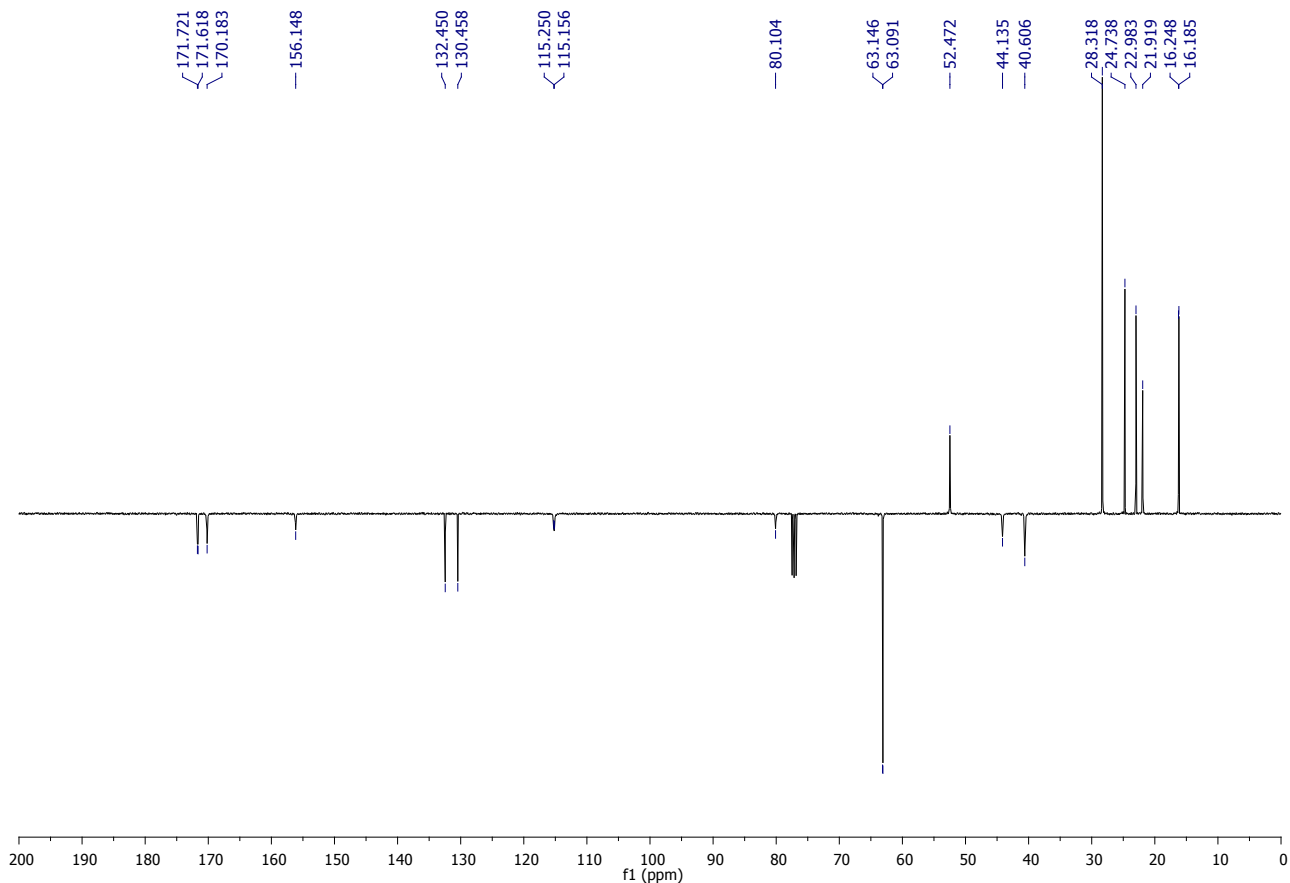



<sup>31</sup>P NMR spectrum

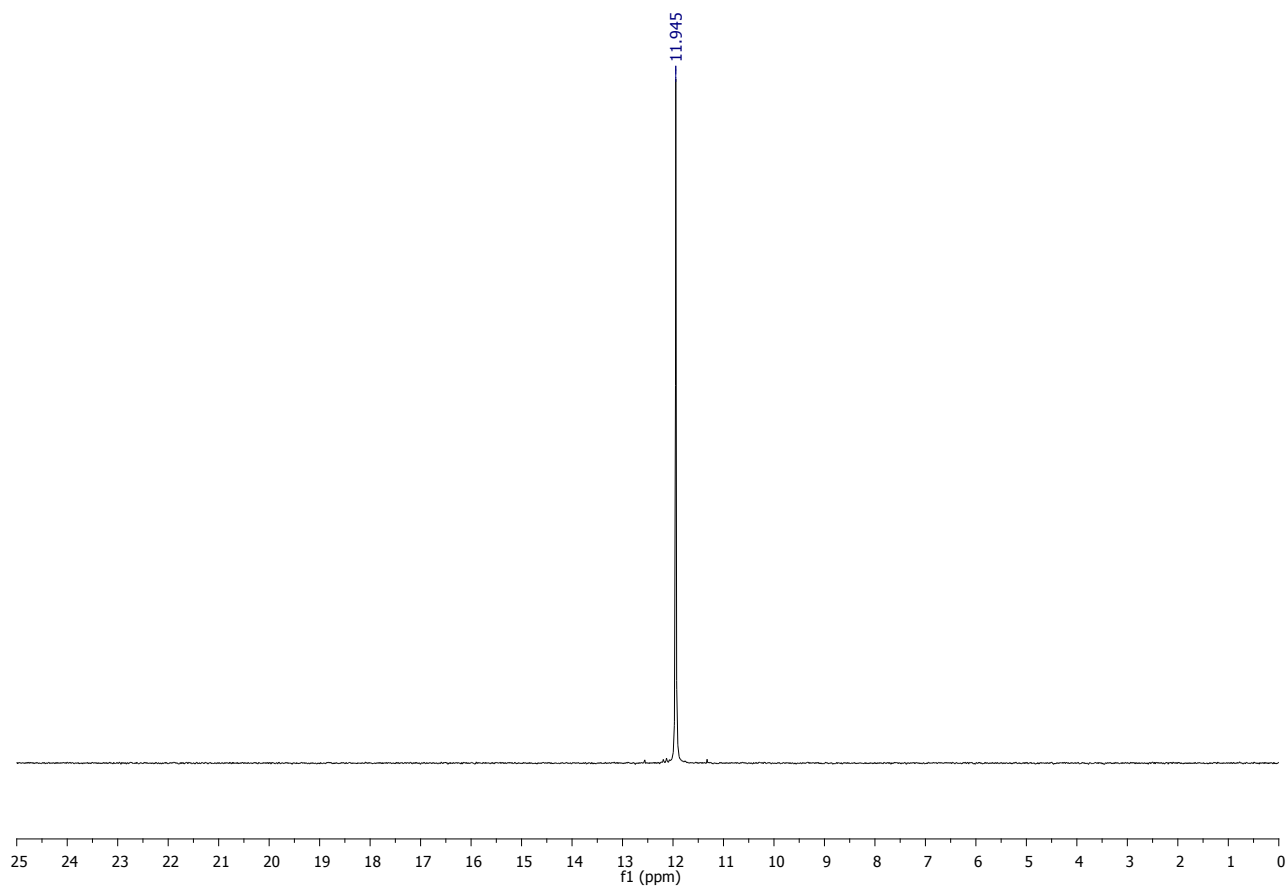

(Benzyloxycarbonylaminoethyl)bis(phosphonic acid monomethyl ester) (21)

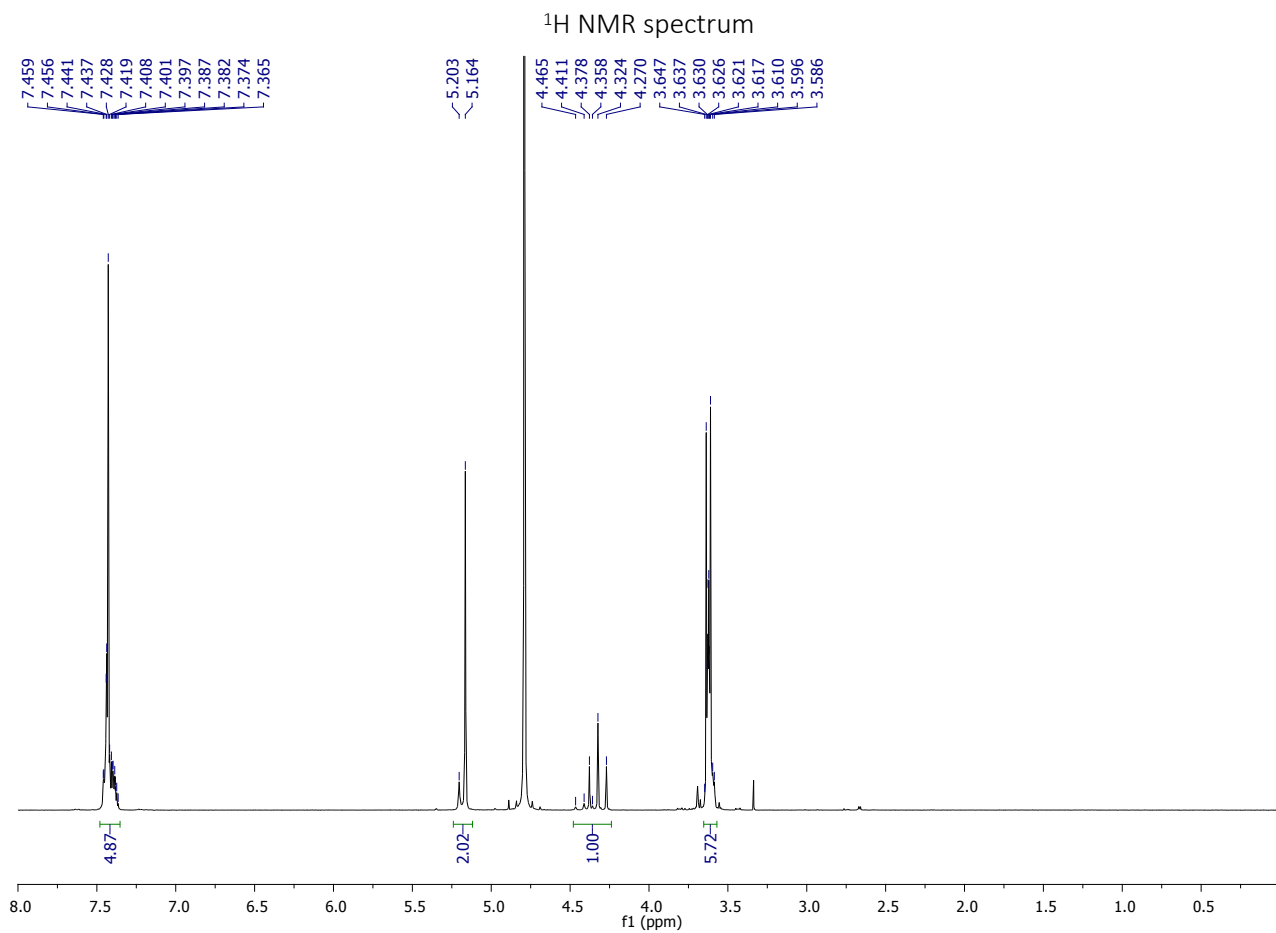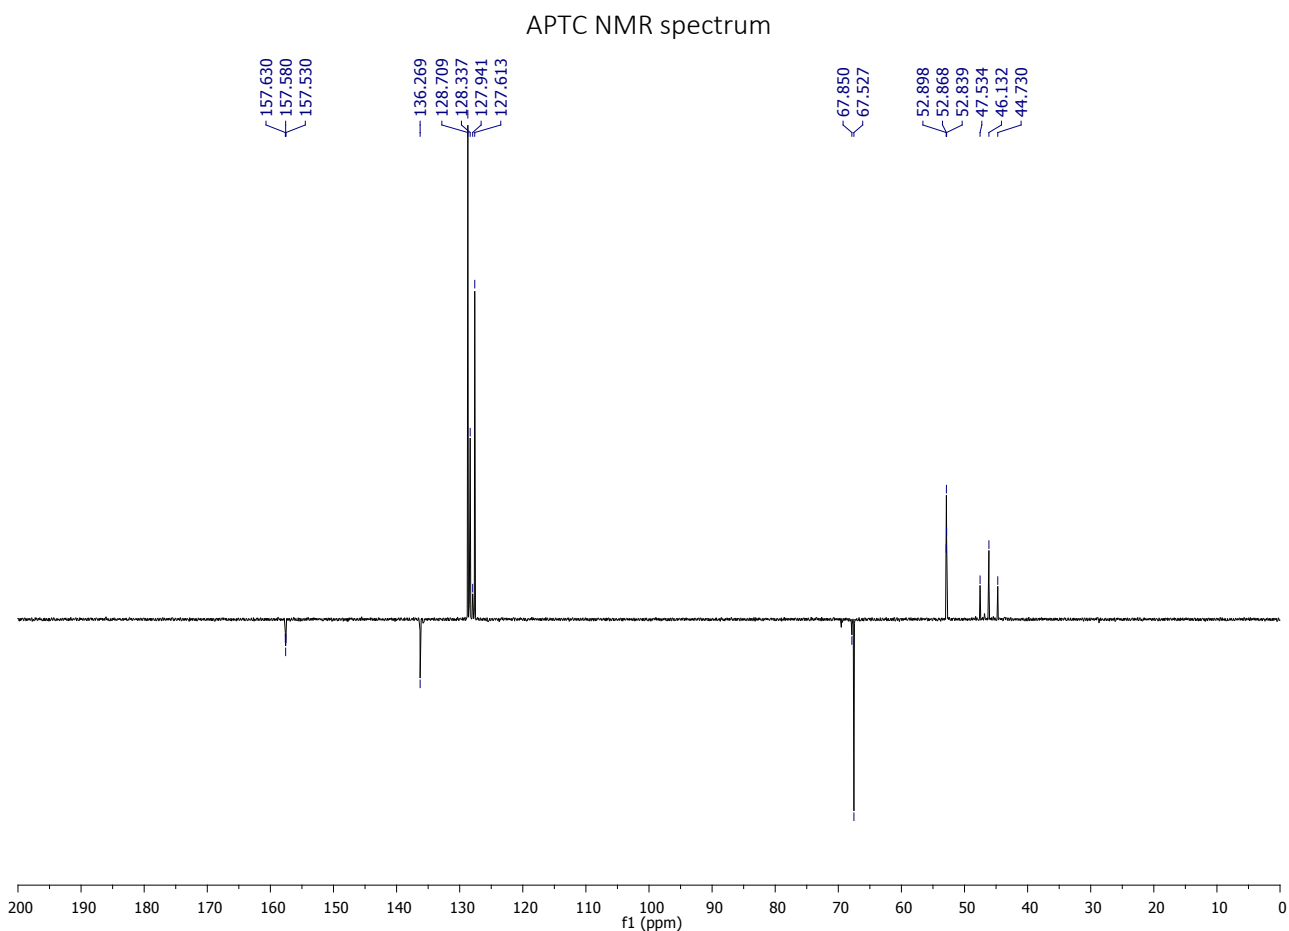

<sup>31</sup>P NMR spectrum

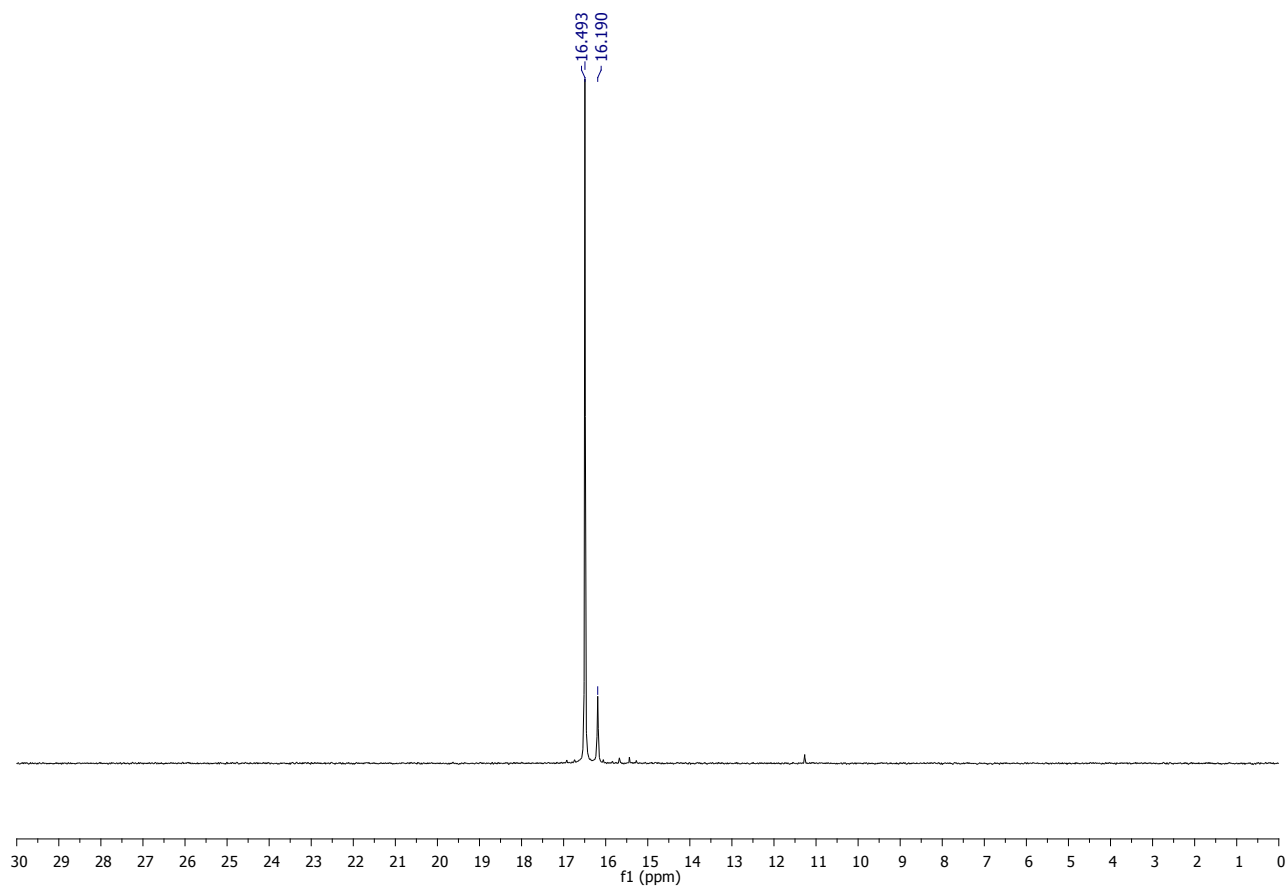

# Diethyl dimethyl (benzyloxycarbonylaminoethyl)bisphosphonate (22)

## <sup>1</sup>H NMR spectrum

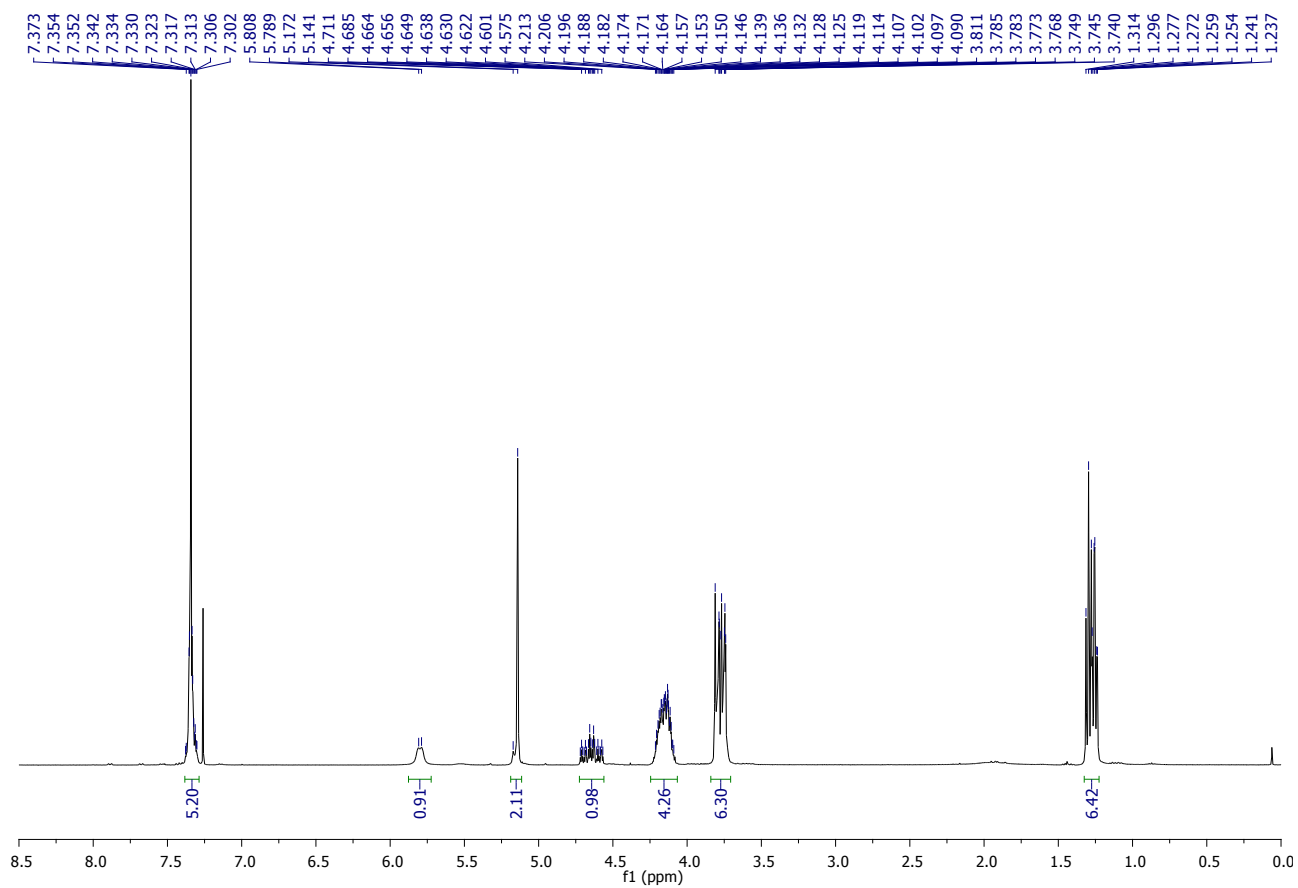

## APTC NMR spectrum

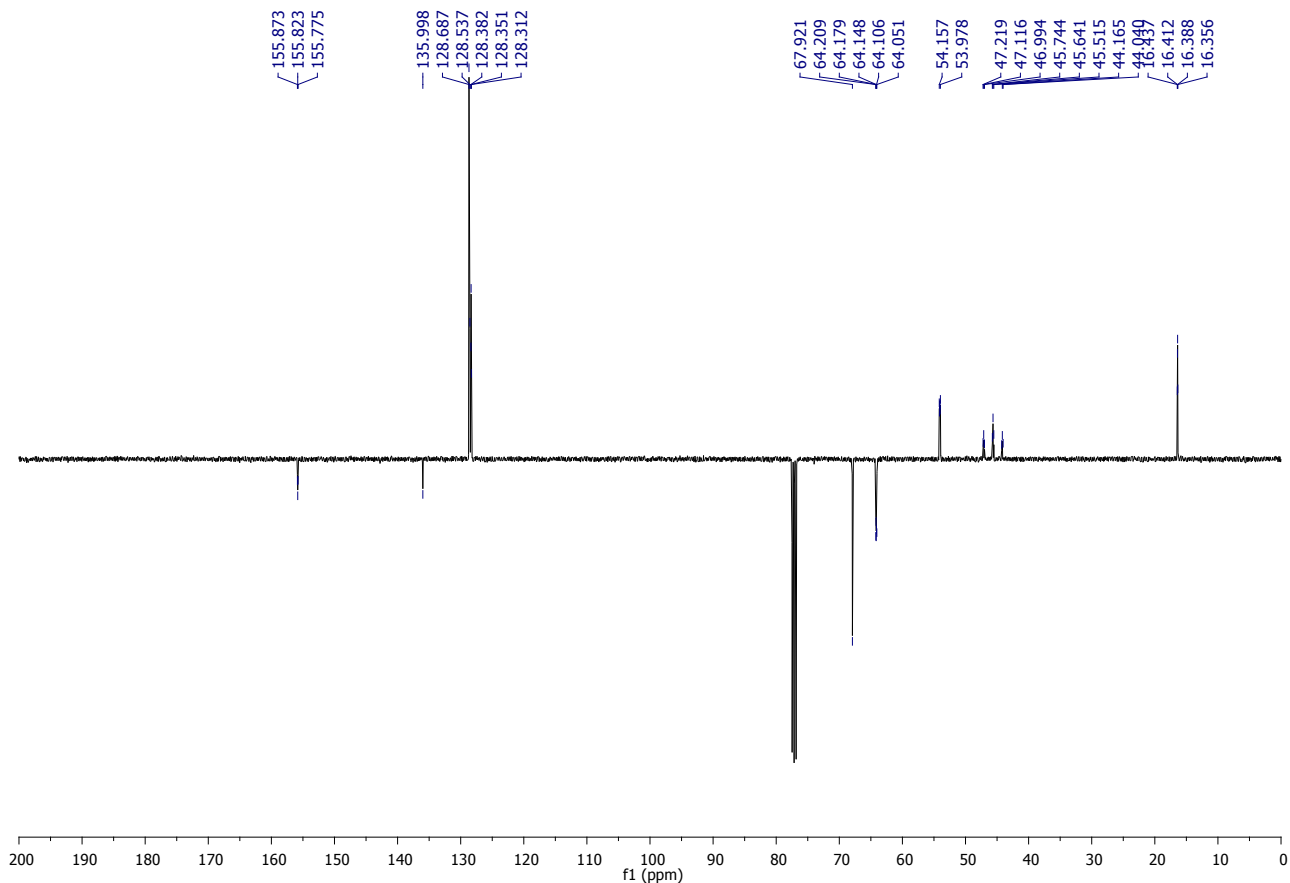

<sup>31</sup>P NMR spectrum

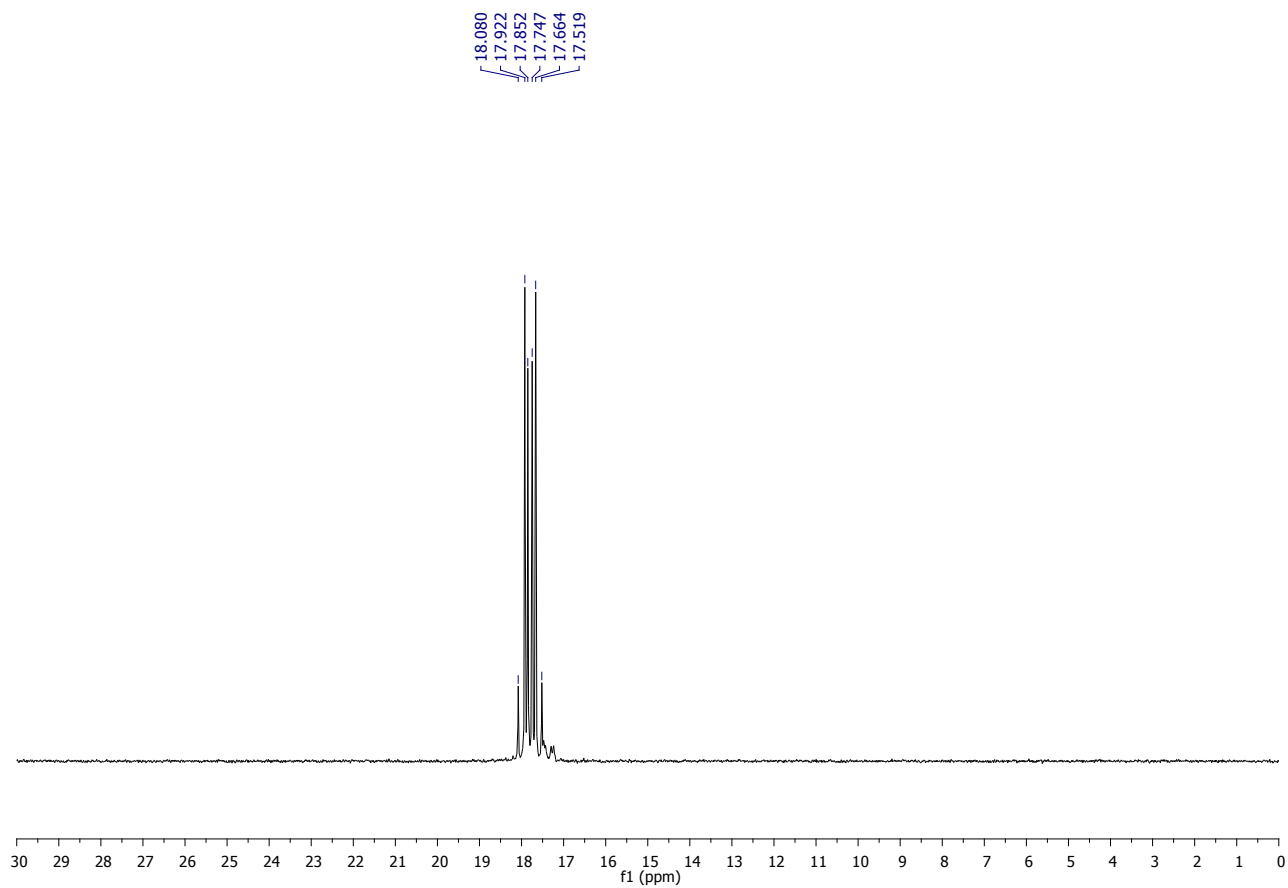

# Diisopropyl dimethyl (benzyloxycarbonylamino methyl)bisphosphonate (23)

## <sup>1</sup>H NMR spectrum

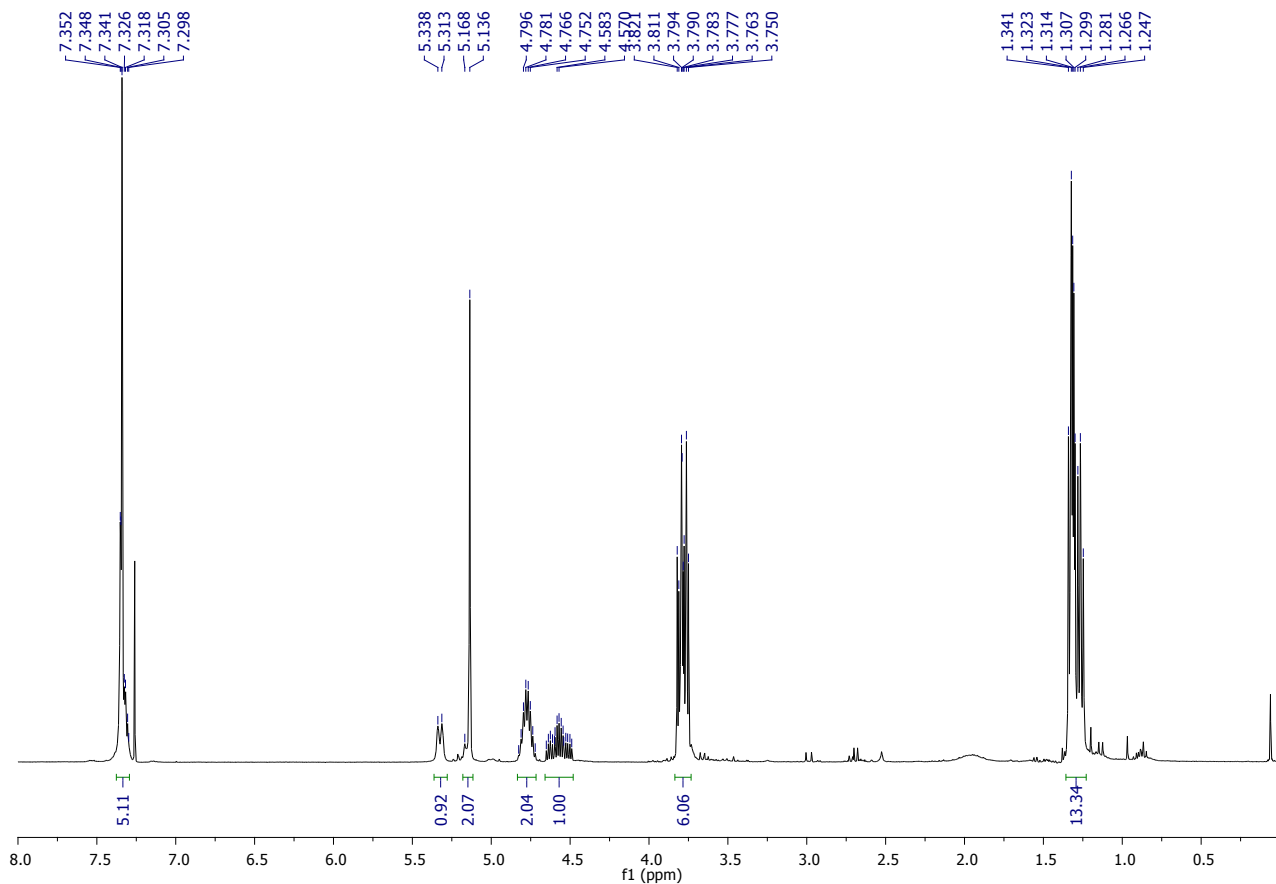

## APTC NMR spectrum

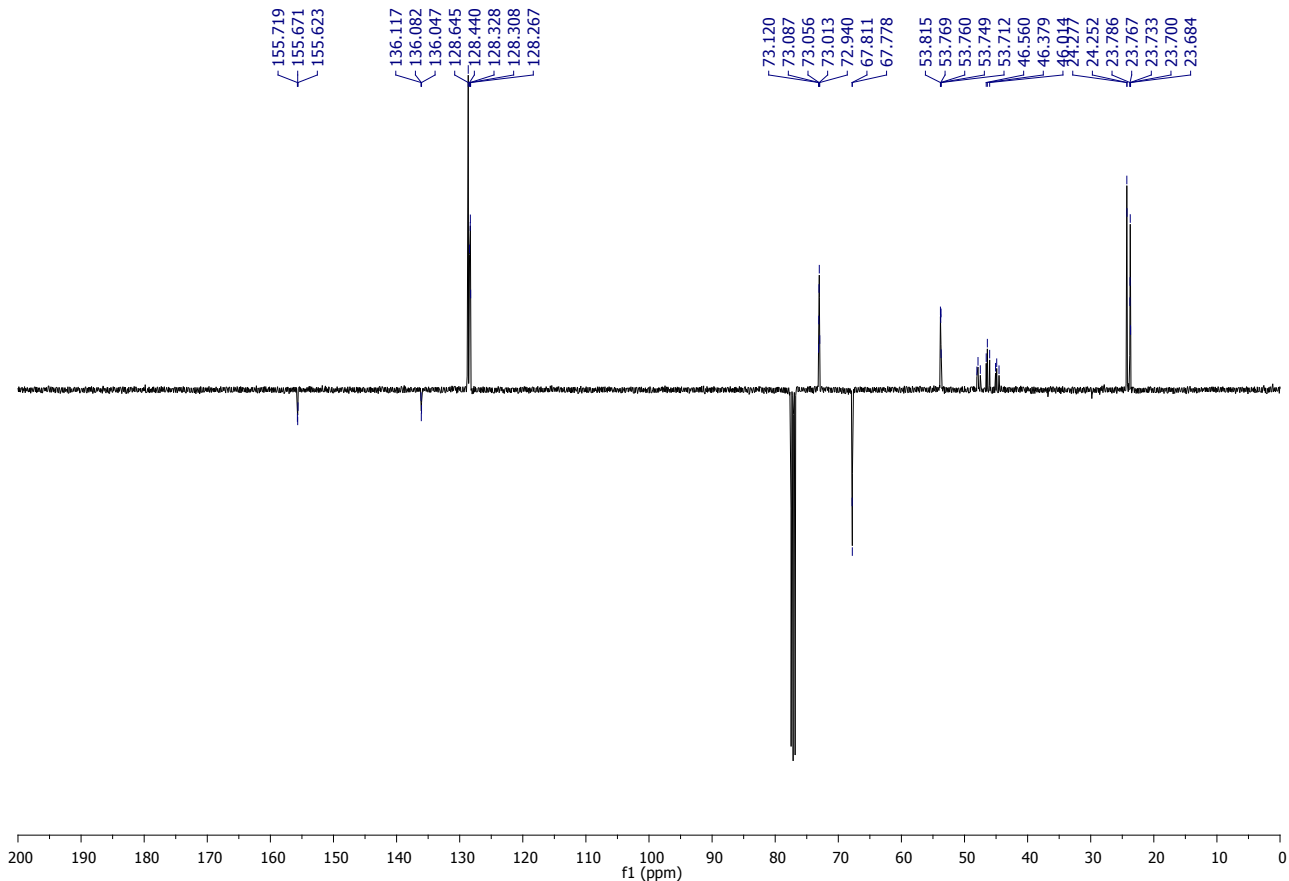

<sup>31</sup>P NMR spectrum

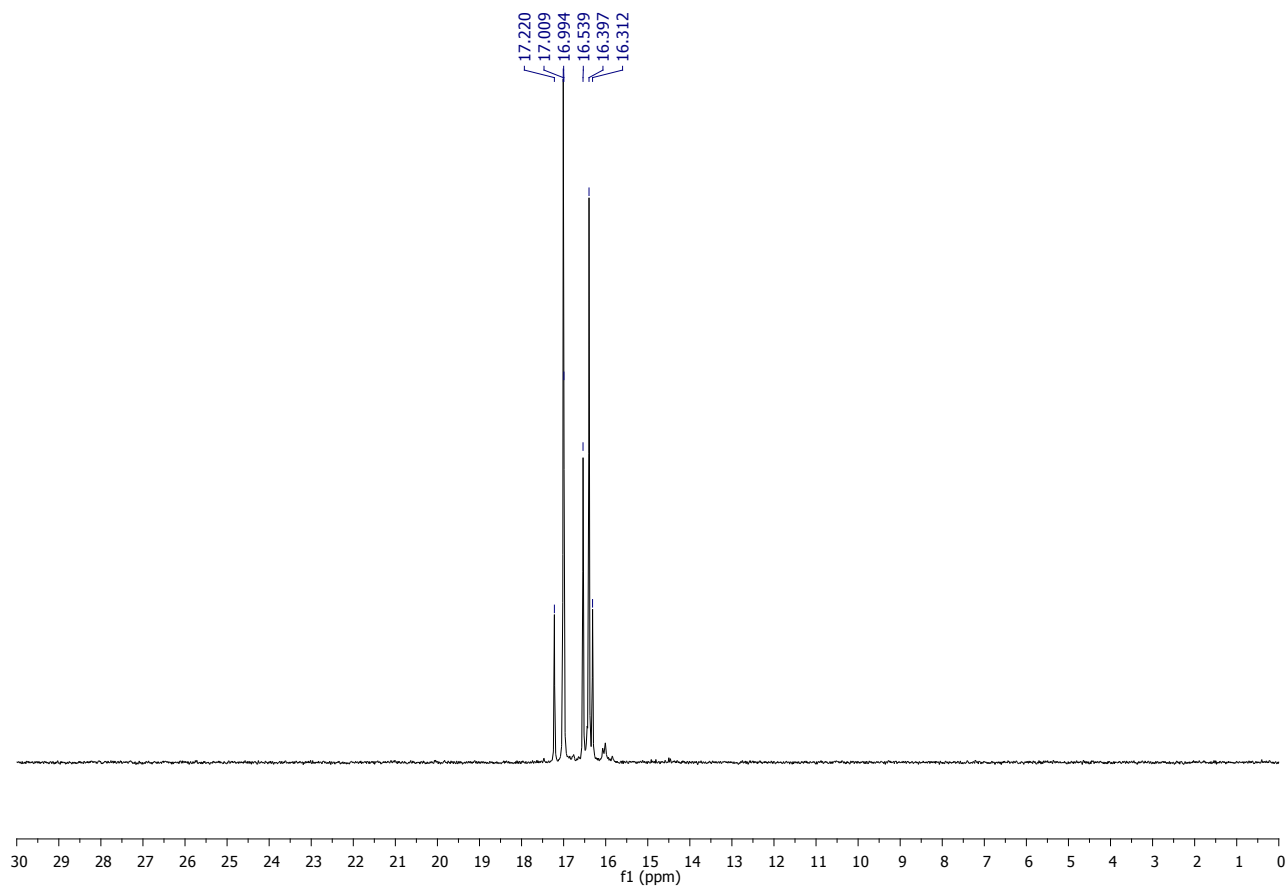

# Diethyl dimethyl [N-(tert-butoxycarbonyl)glycyl-L-leucylamidomethyl]bisphosphonate (24)

## <sup>1</sup>H NMR spectrum

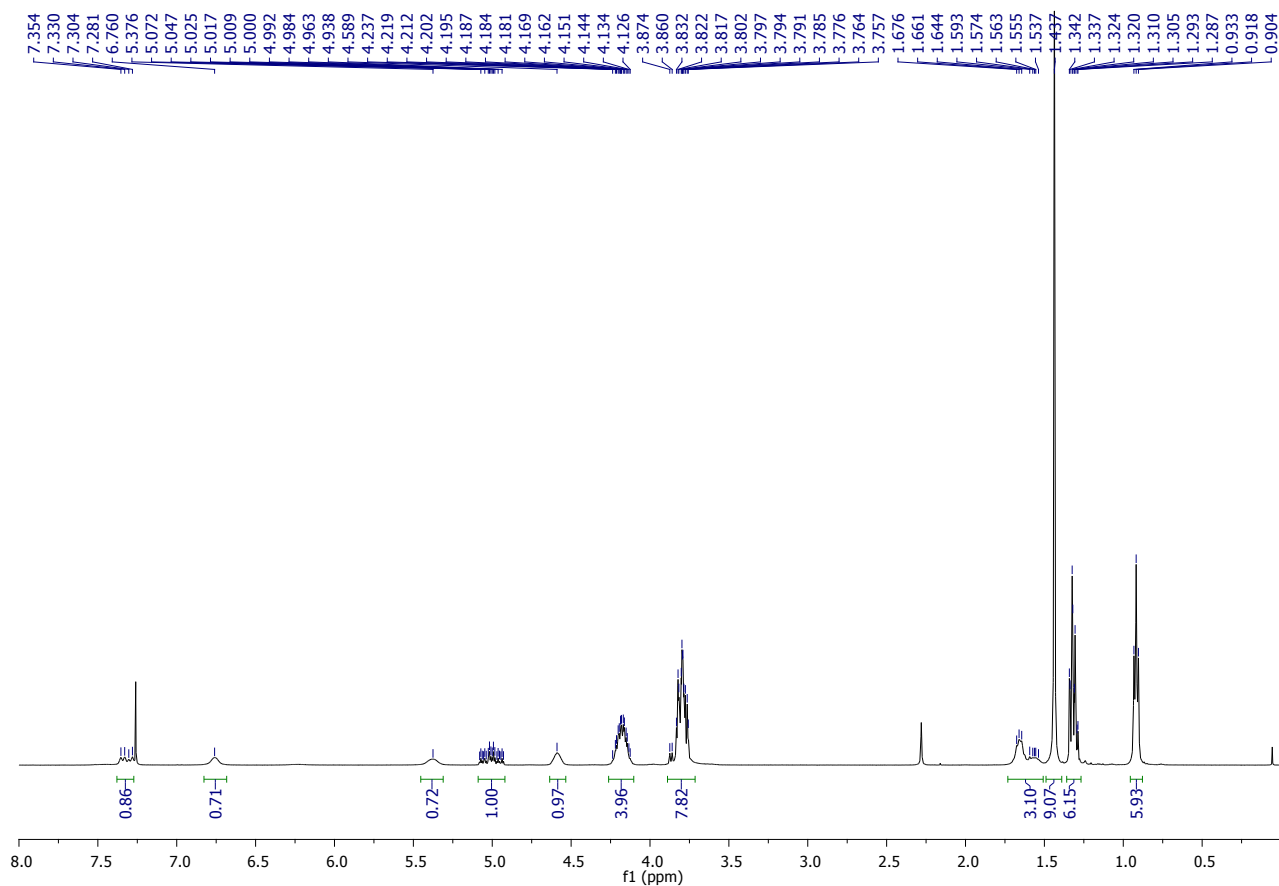

## APTC NMR spectrum

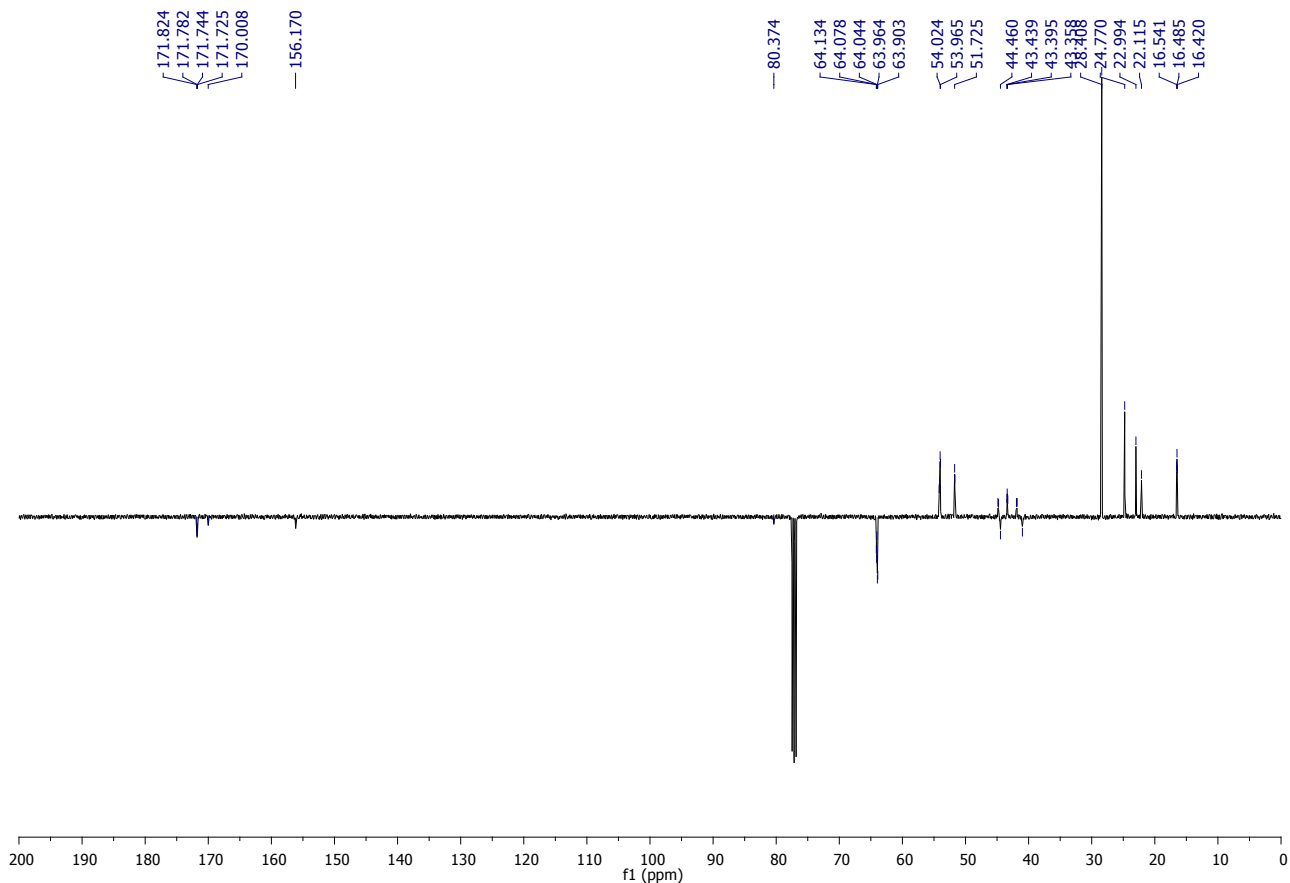



<sup>31</sup>P NMR spectrum

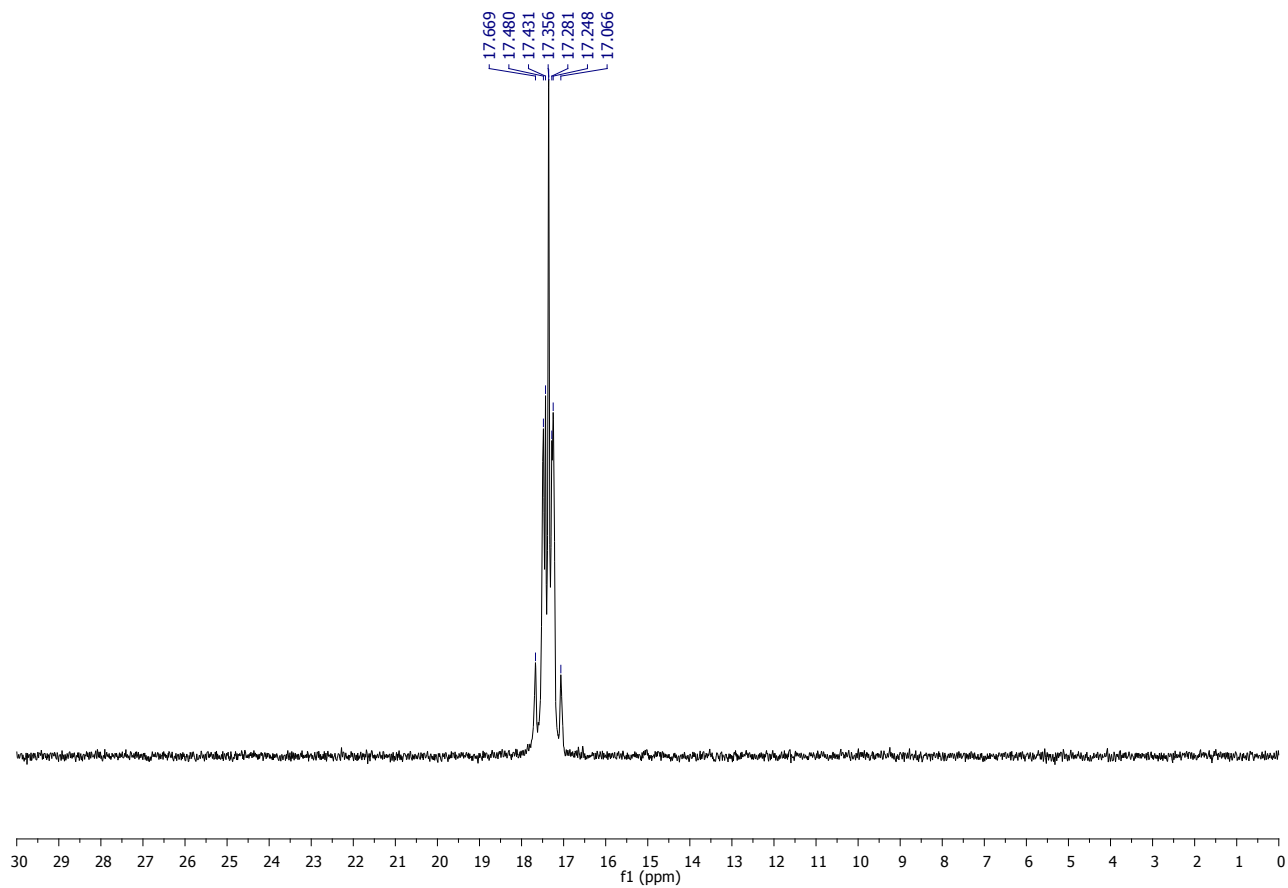

# Diisopropyl dimethyl [N-(*tert*-butoxycarbonyl)glycyl-L-leucylamidomethyl]bisphosphonate (25)

## <sup>1</sup>H NMR spectrum

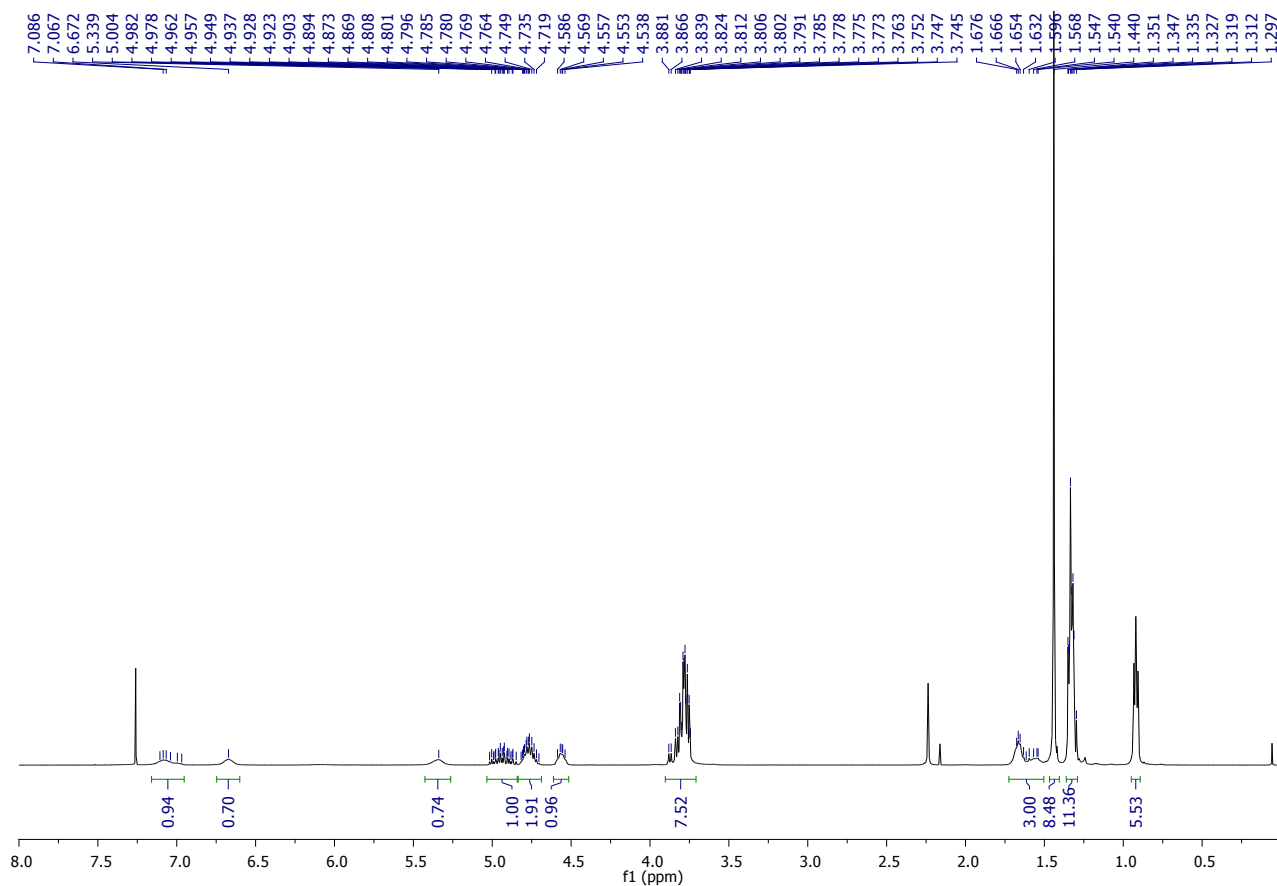

## APTC NMR spectrum

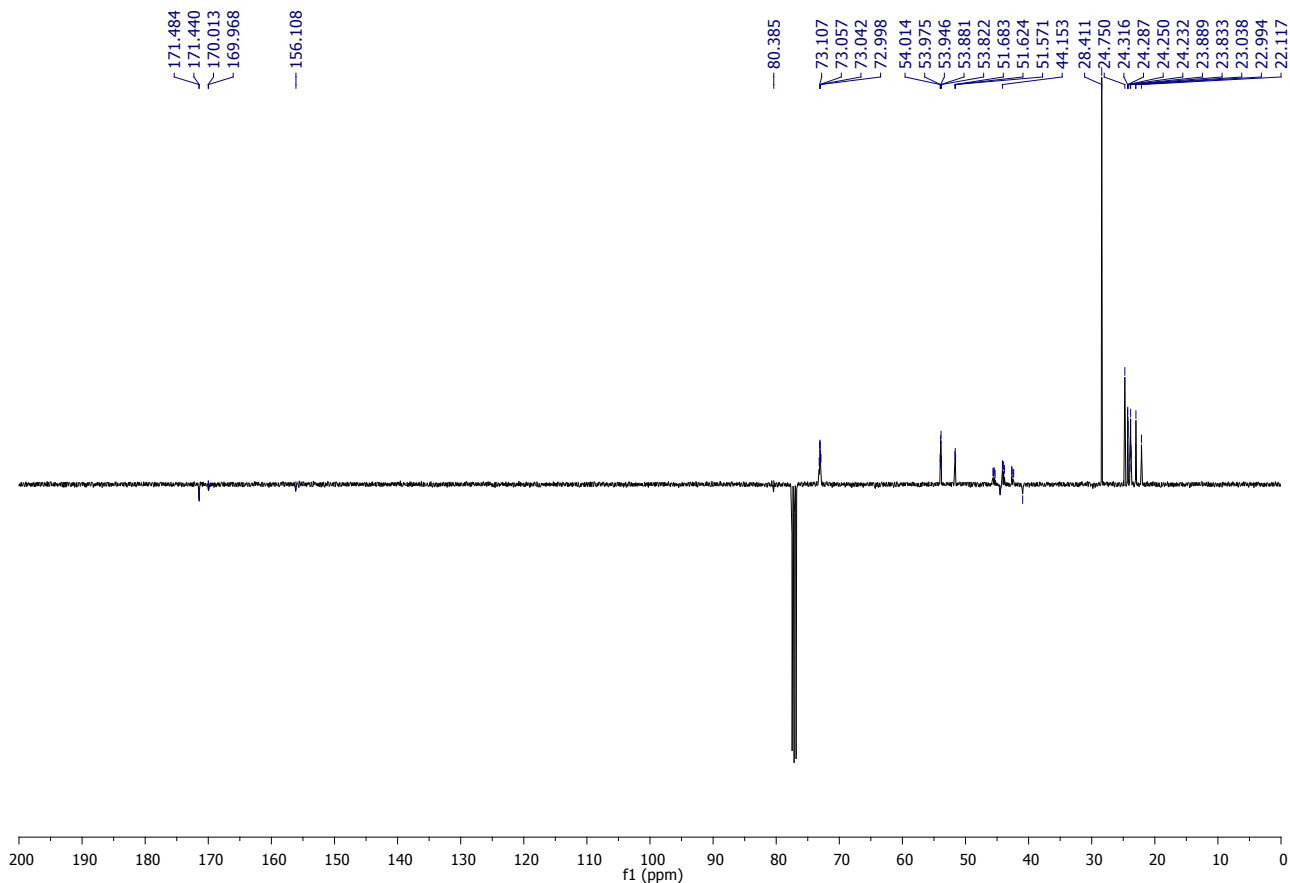

$^{31}\text{P}$  NMR spectrum

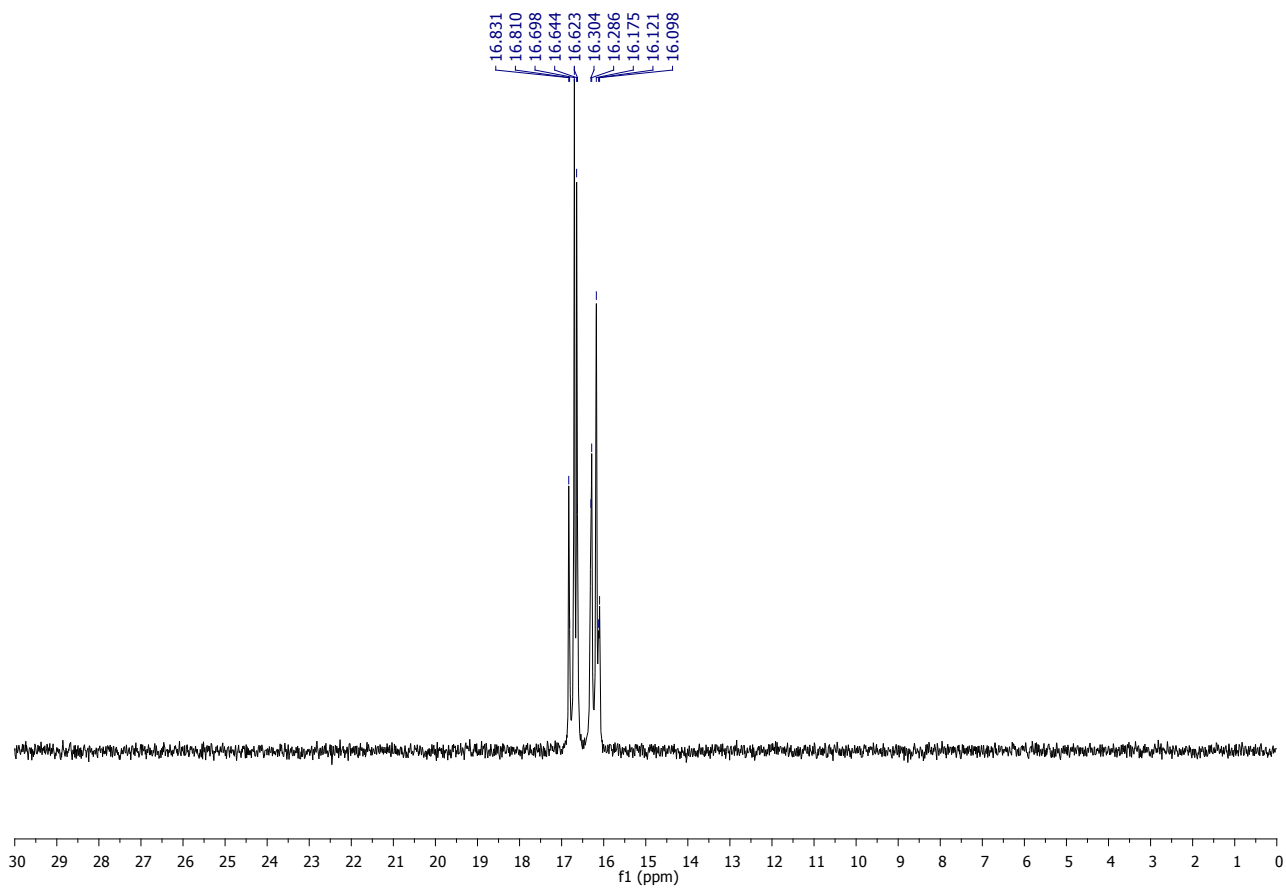

# Ethyl methyl {1-[*N*-(*tert*-butoxycarbonyl)glycyl-L-leucylamido]ethen-1-yl}phosphonate (26)

## <sup>1</sup>H NMR spectrum

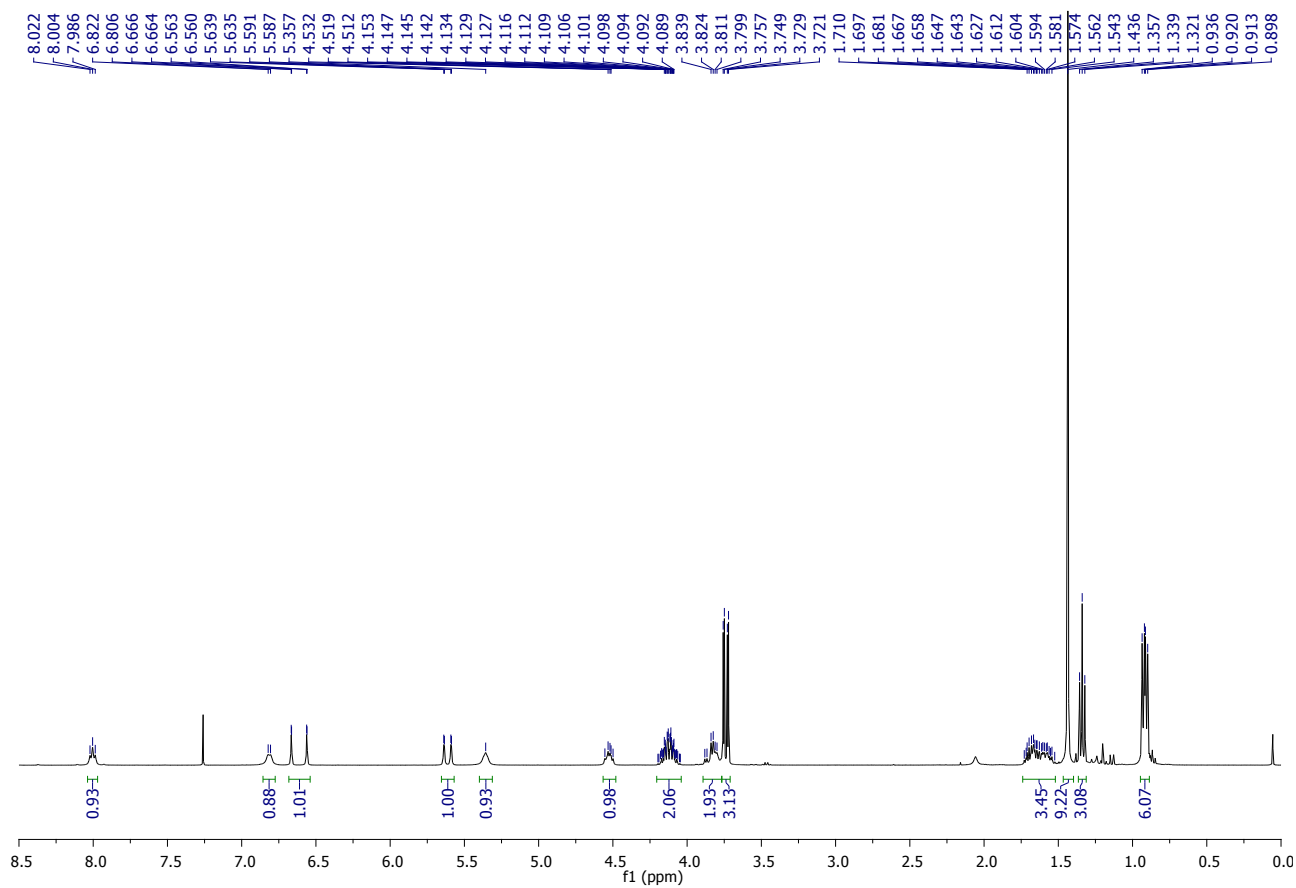

## APTC NMR spectrum

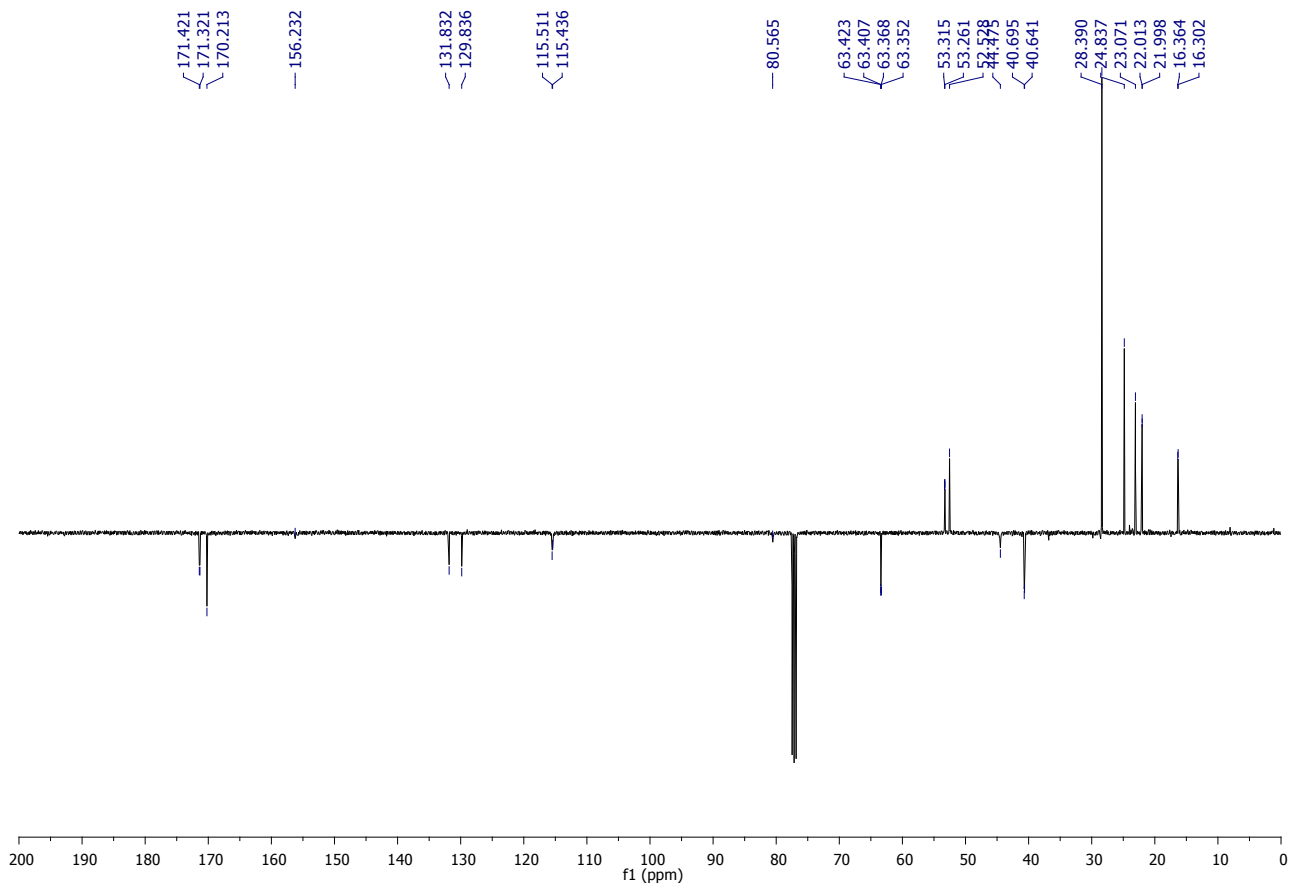

<sup>31</sup>P NMR spectrum

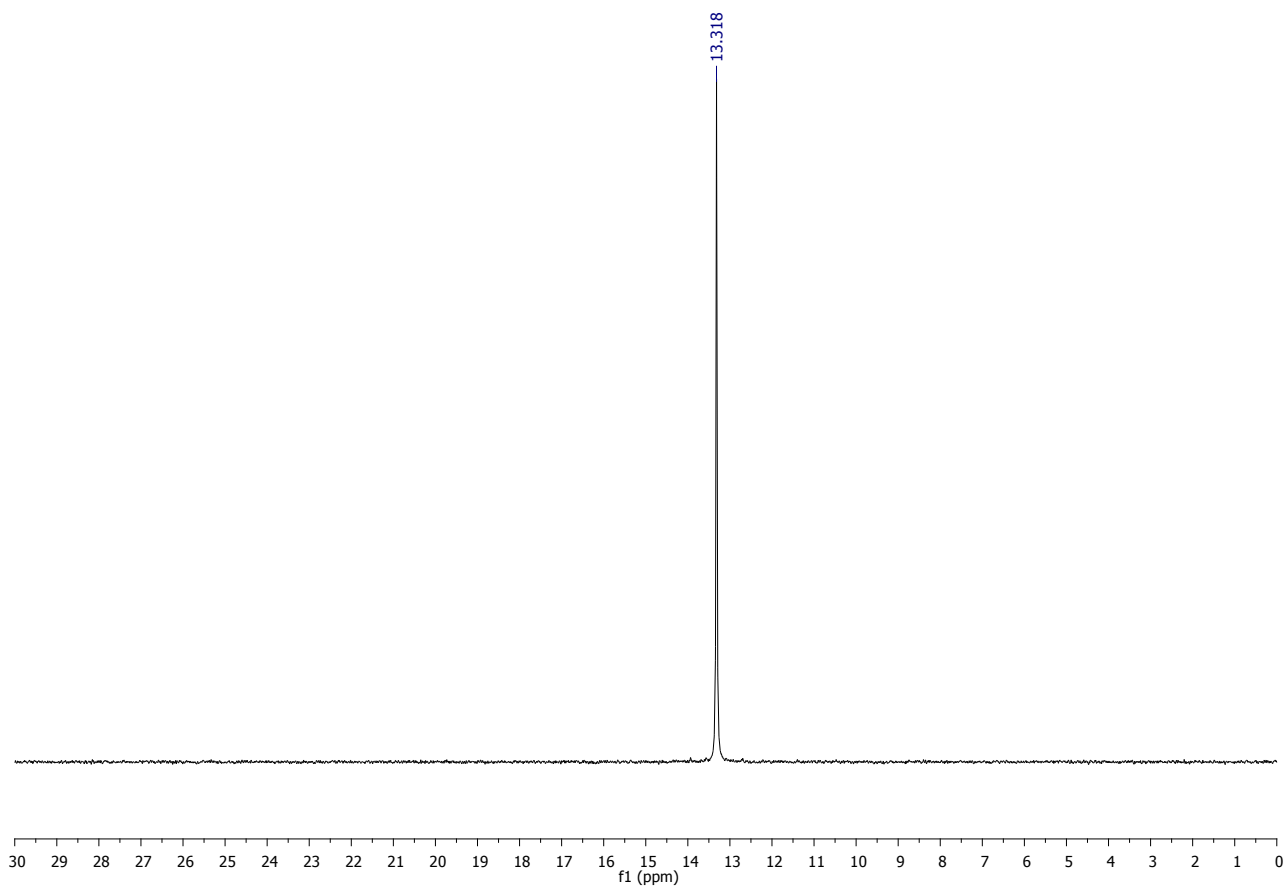

Isopropyl methyl {1-[N-(*tert*-butoxycarbonyl)glycyl-L-leucylamido]ethen-1-yl}phosphonate (27)

<sup>1</sup>H NMR spectrum

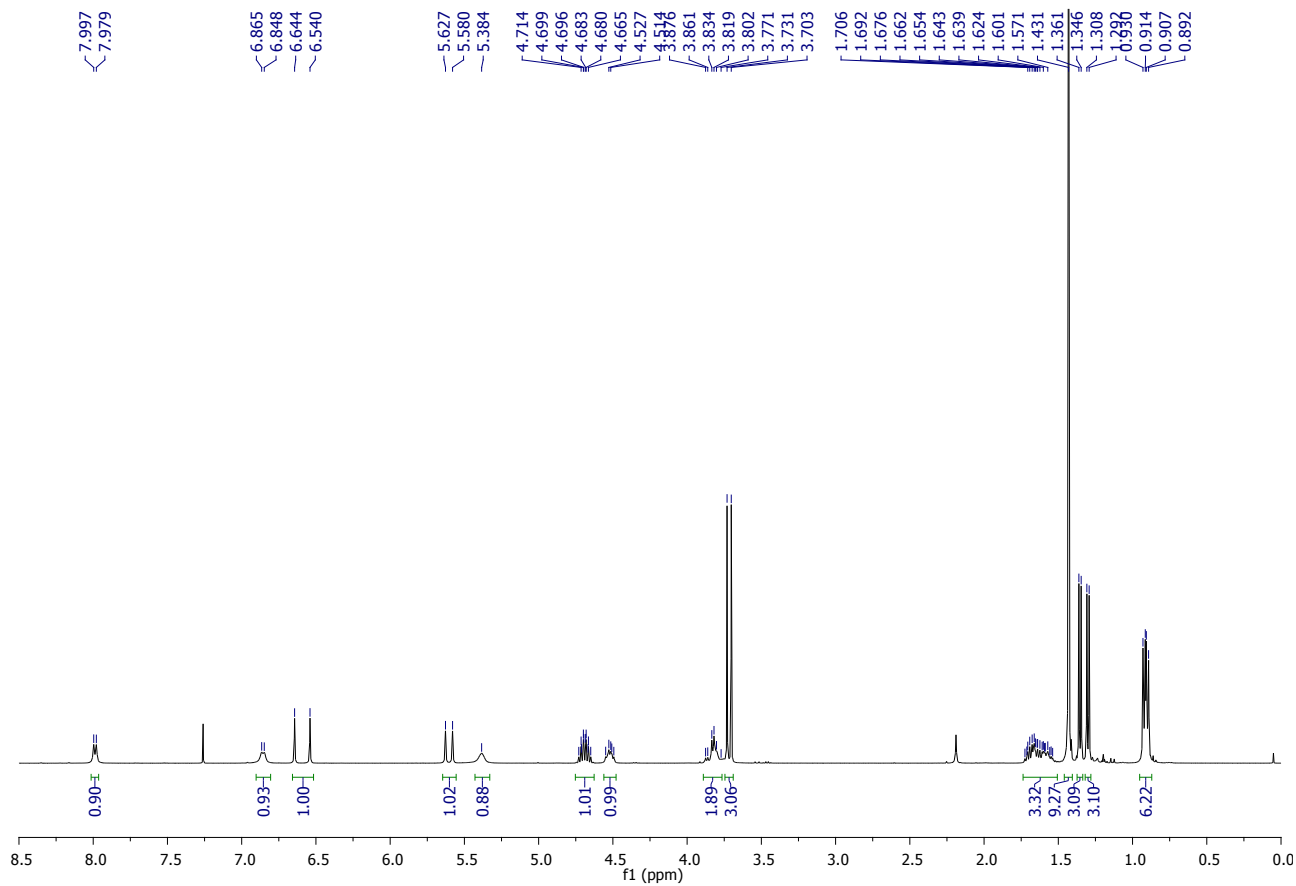

APTC NMR spectrum

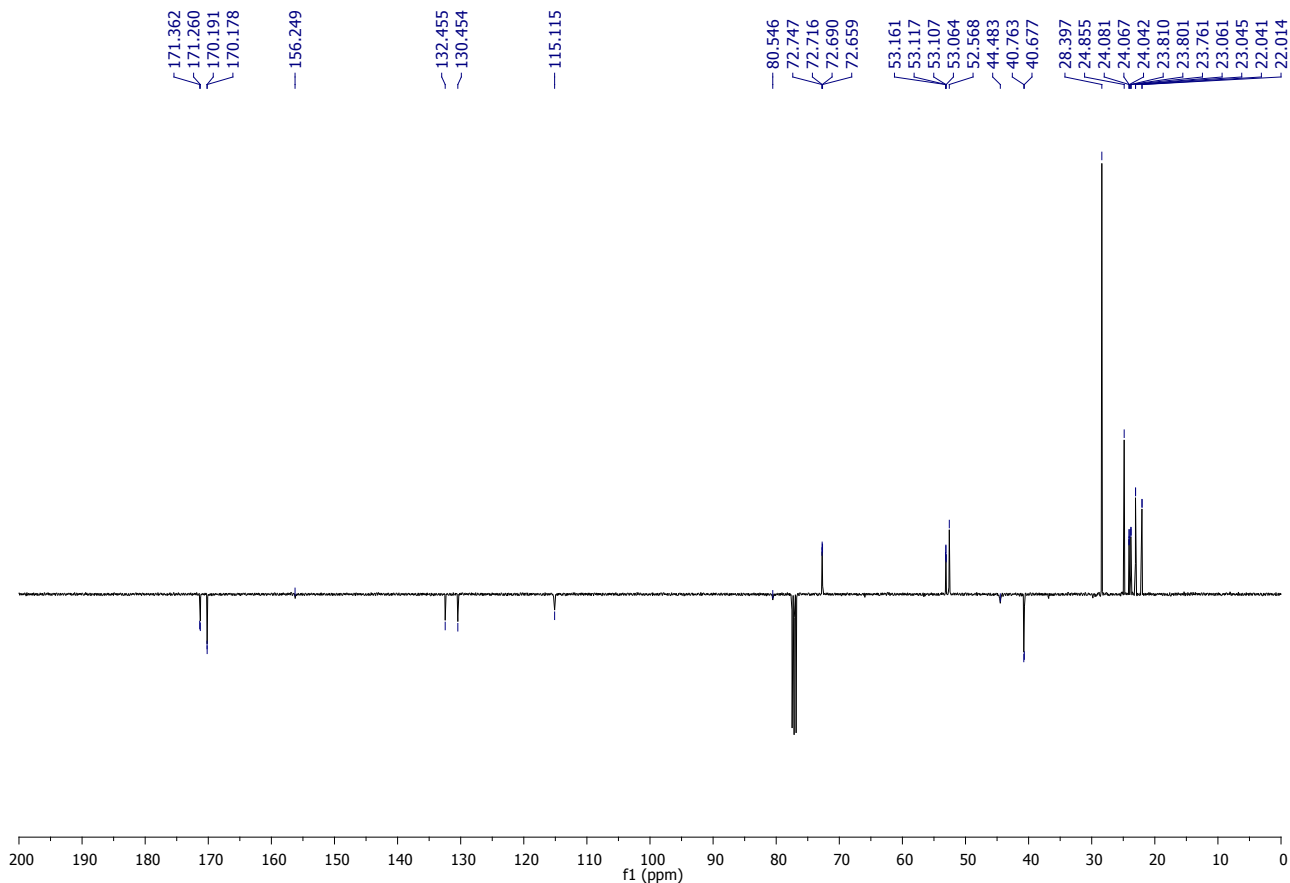

<sup>31</sup>P NMR spectrum

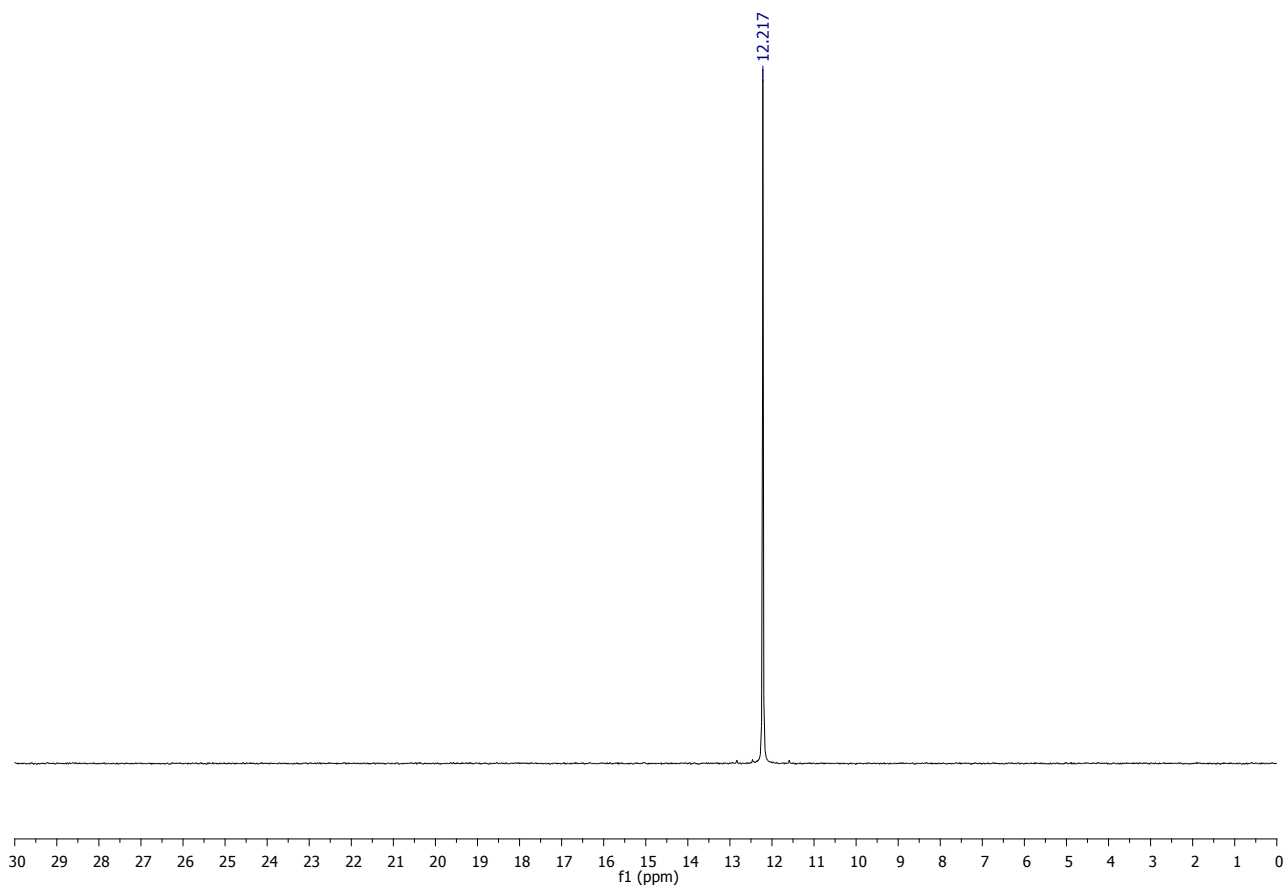

# [1-(Glycyl-L-leucylamido)ethen-1-yl]phosphonic acid monoethyl ester (15)

<sup>1</sup>H NMR spectrum

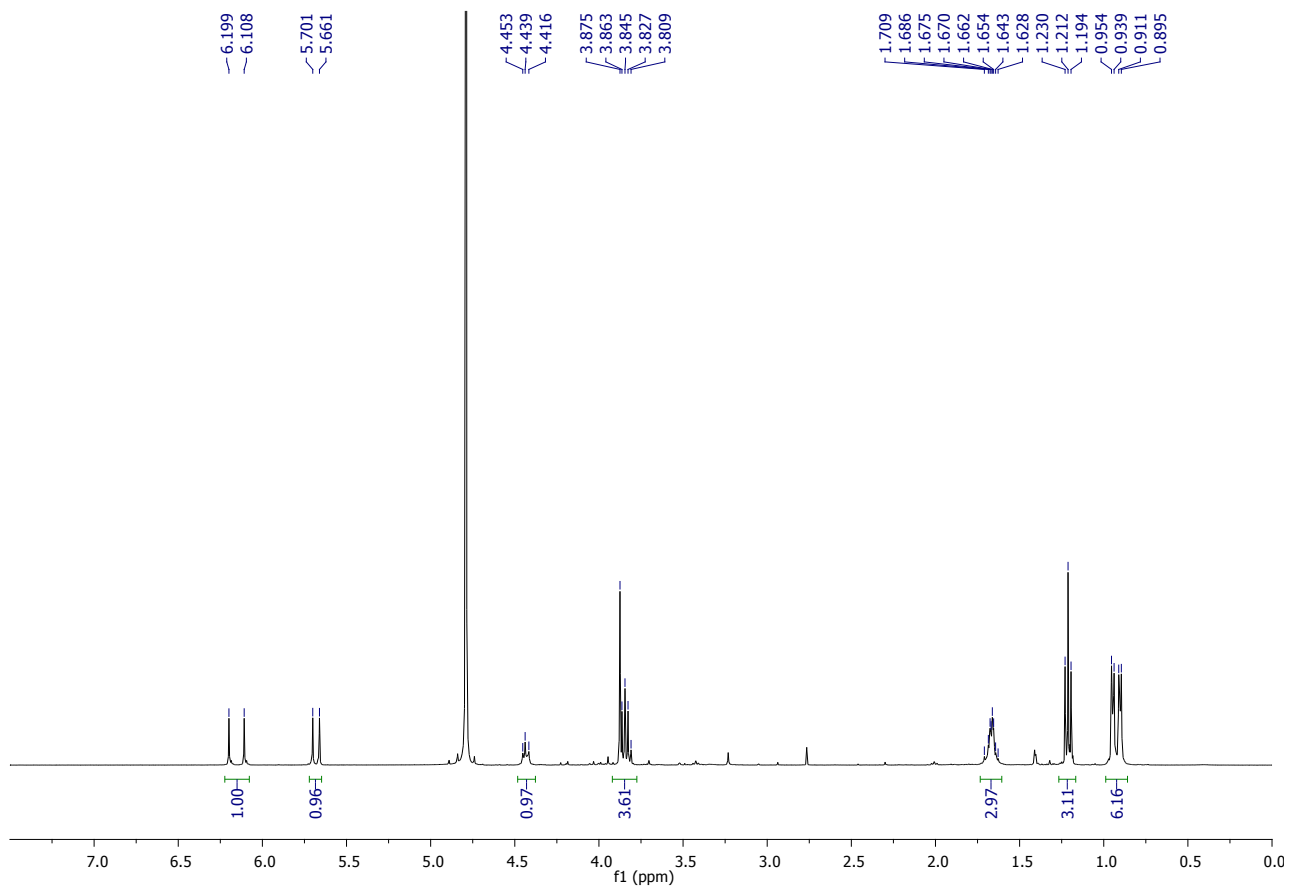

APTC NMR spectrum

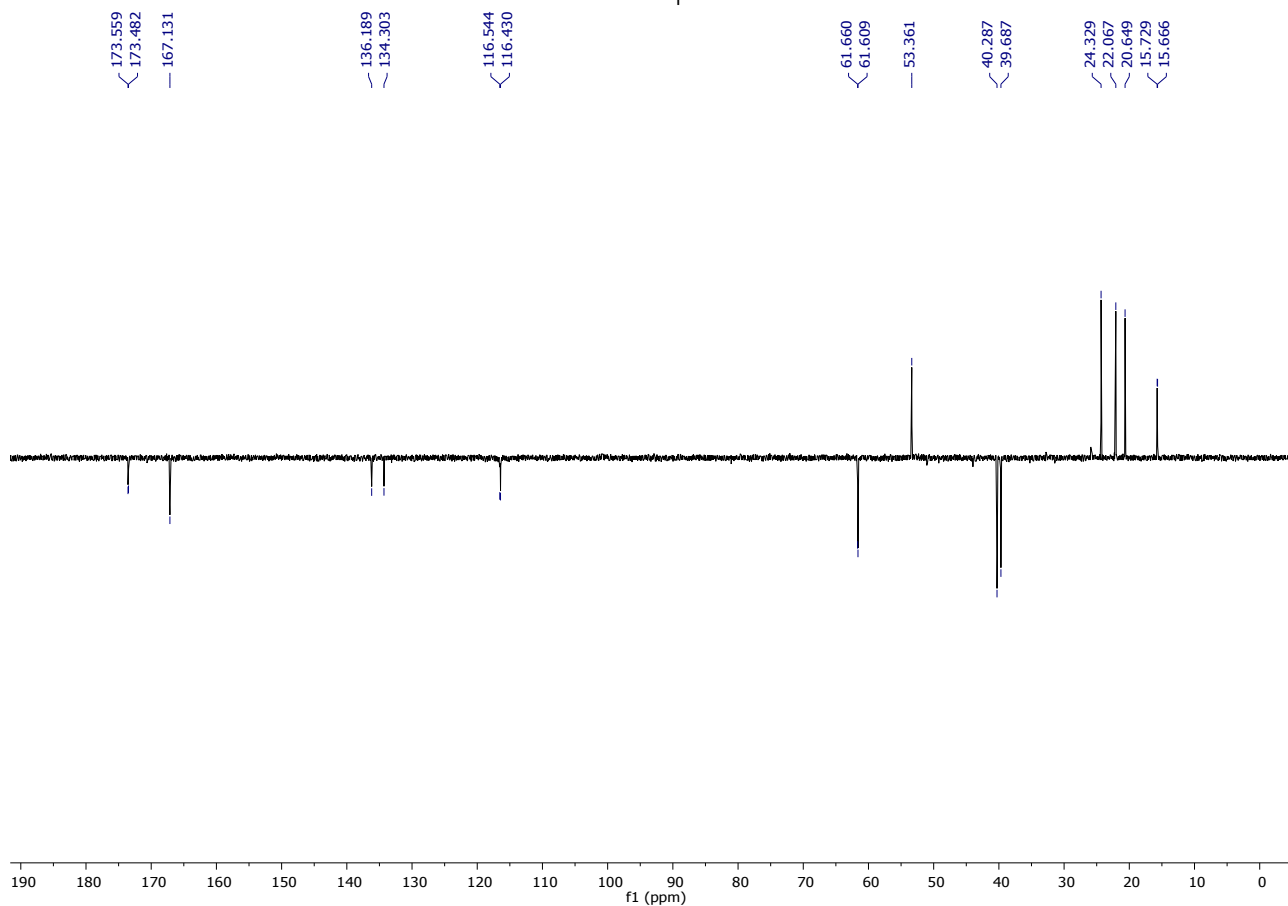



$^{31}\text{P}$  NMR spectrum

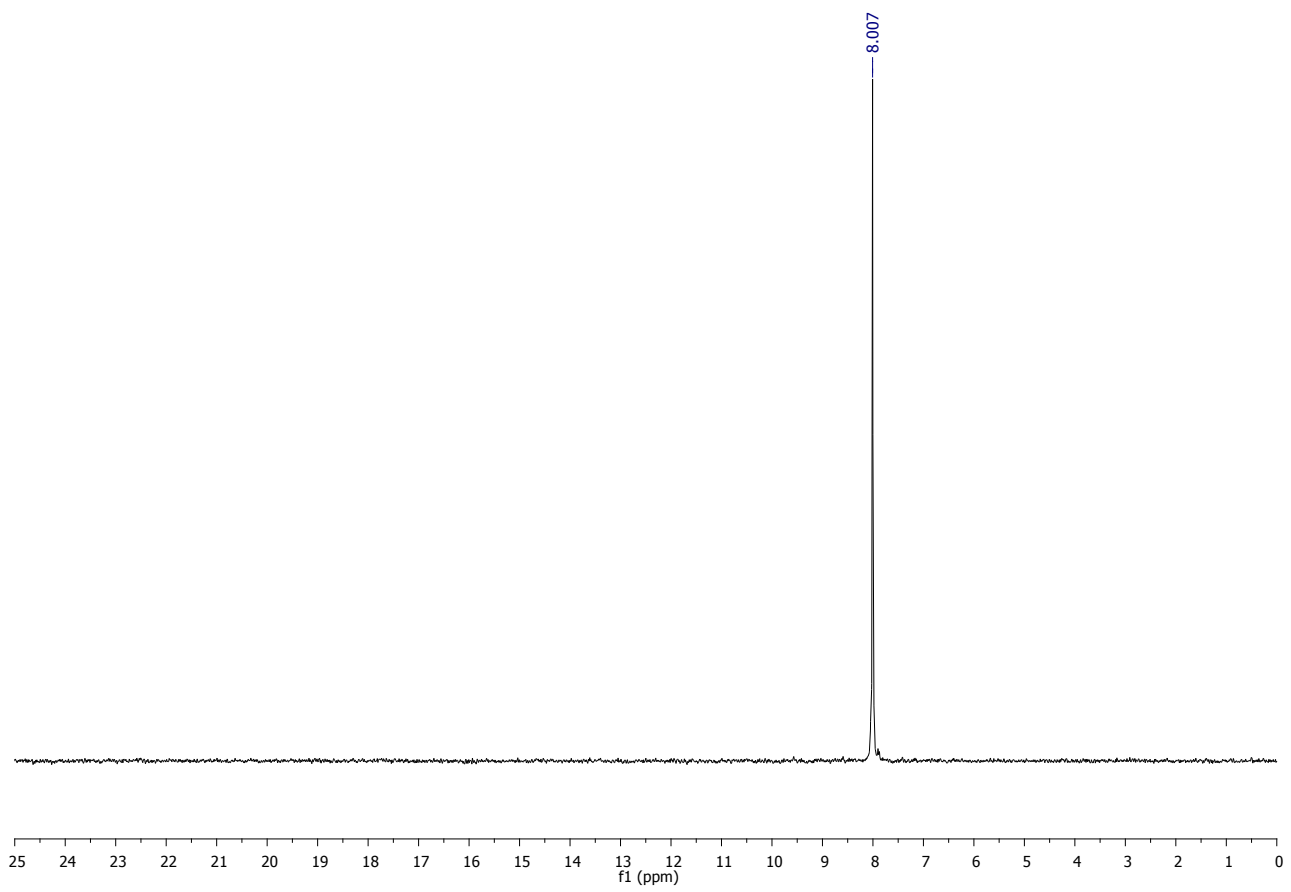

# [1-(Glycyl-L-leucylamido)ethen-1-yl]phosphonic acid monoisopropyl ester (16)

<sup>1</sup>H NMR spectrum

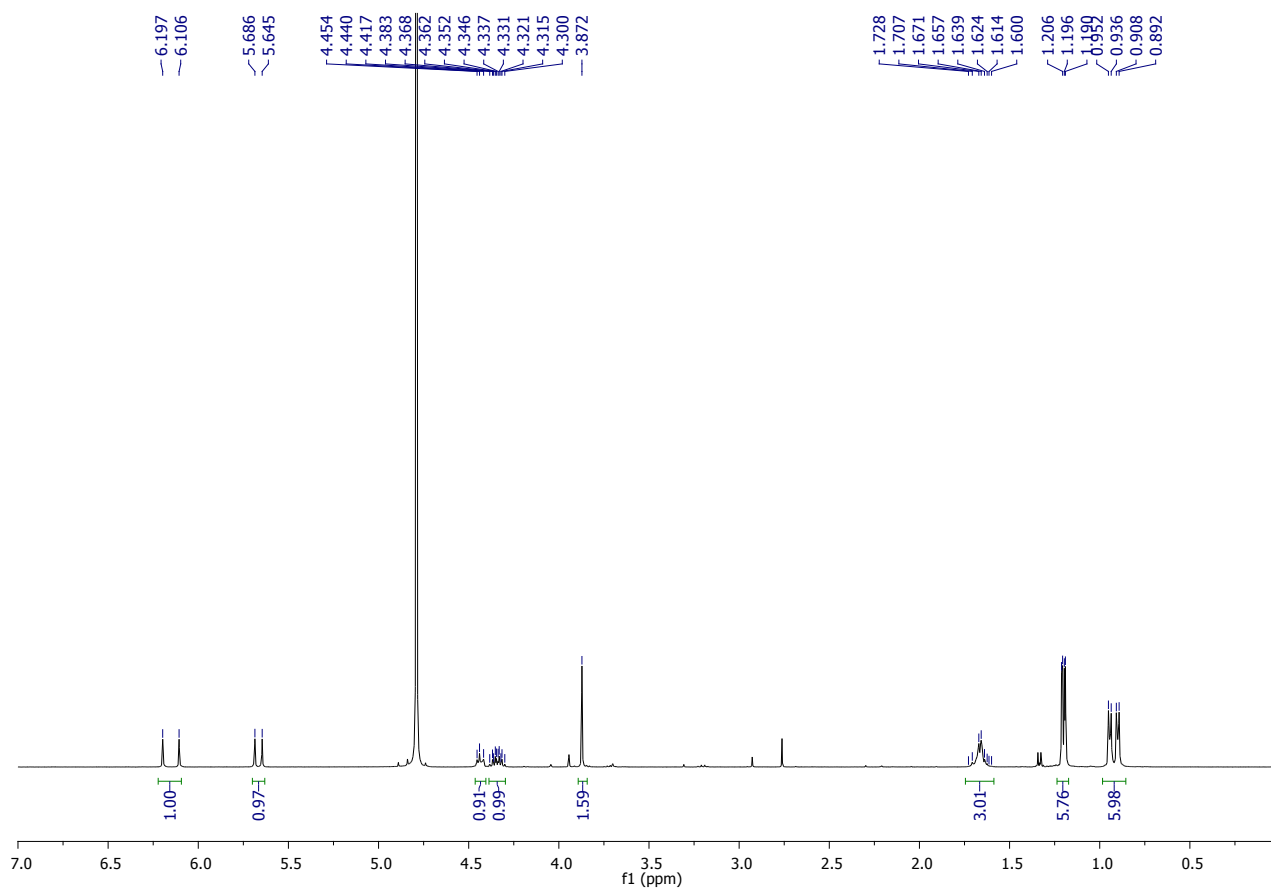

APTC NMR spectrum

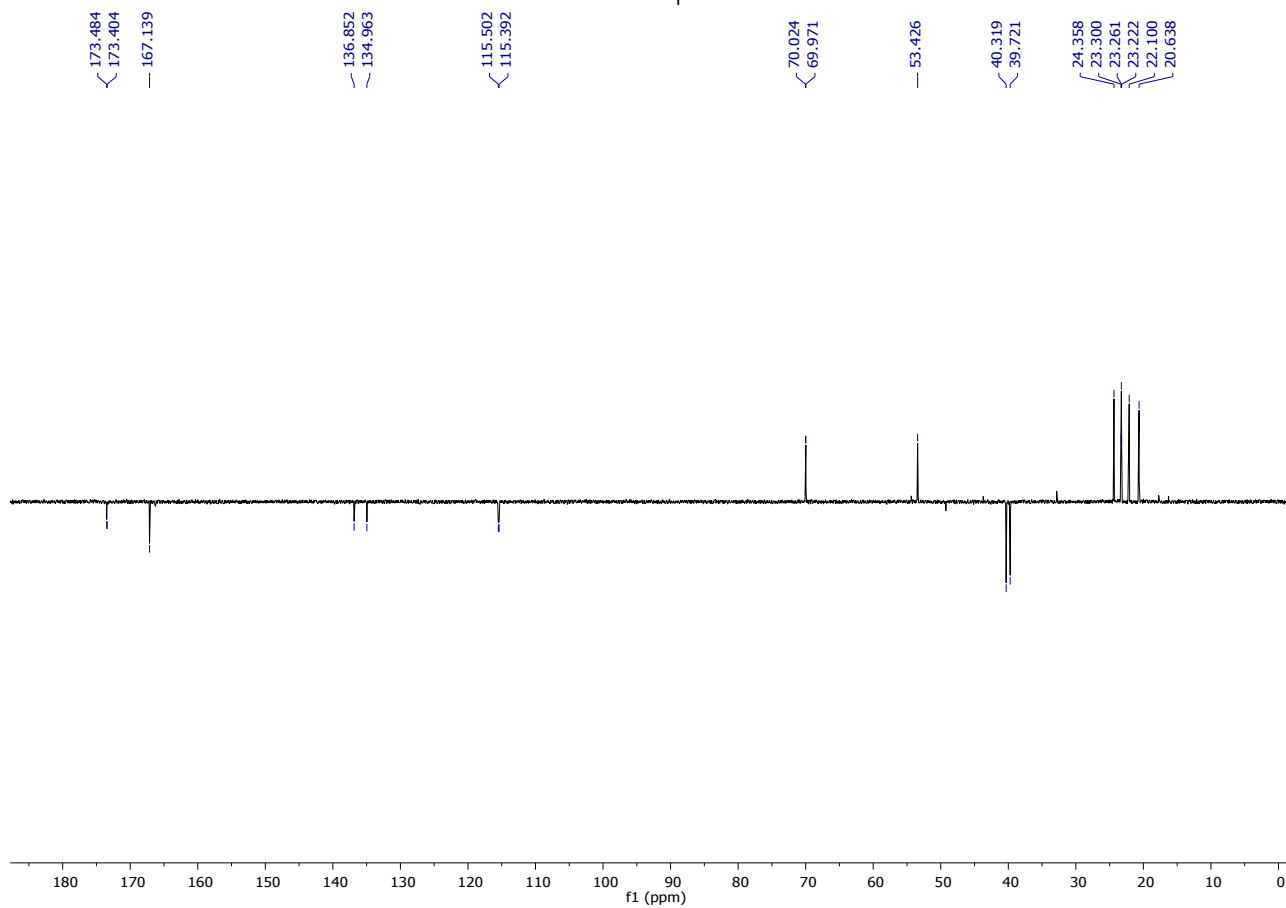

<sup>31</sup>P NMR spectrum

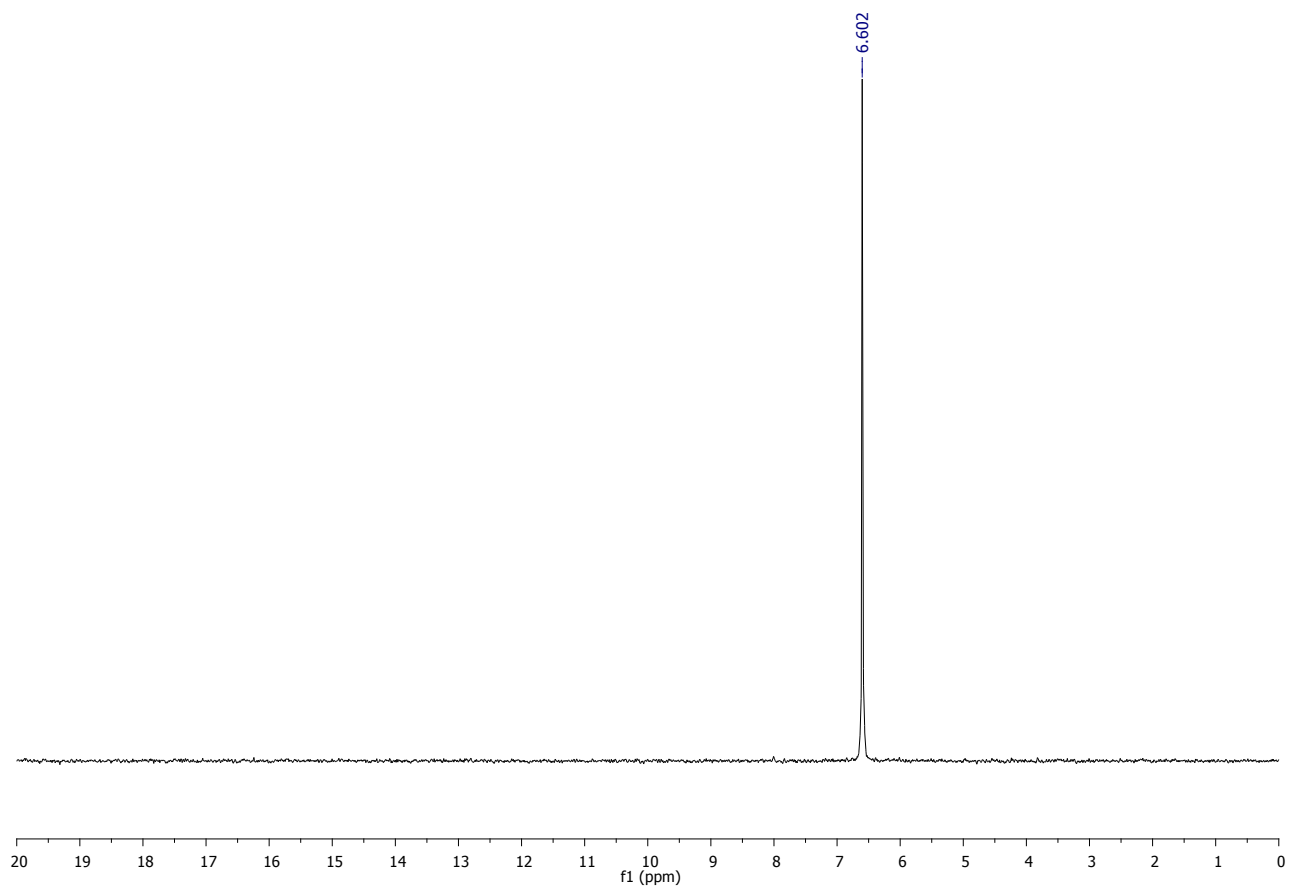

# Dehydrophos

## $^1\text{H}$ NMR spectrum

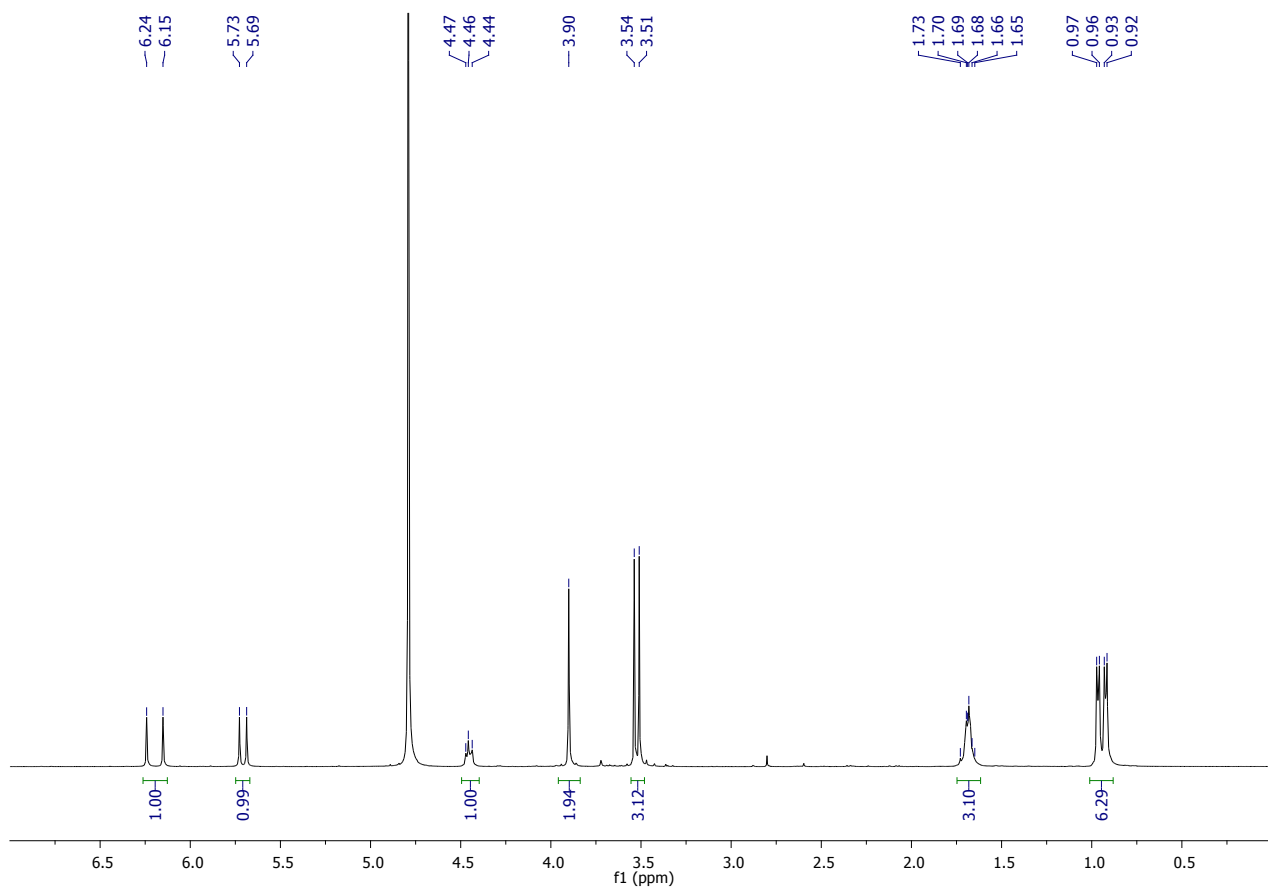

## APTC NMR spectrum

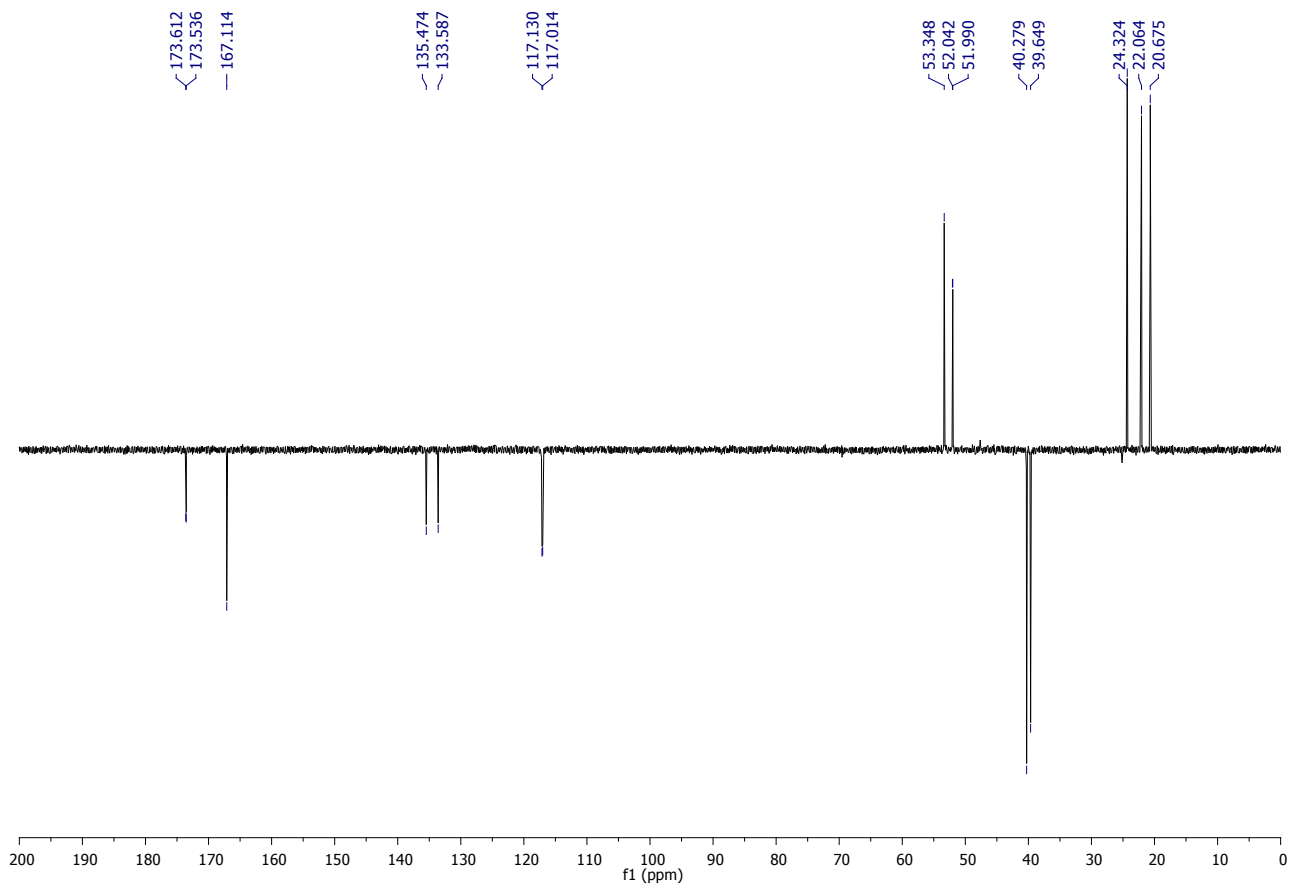

$^{31}\text{P}$  NMR spectrum

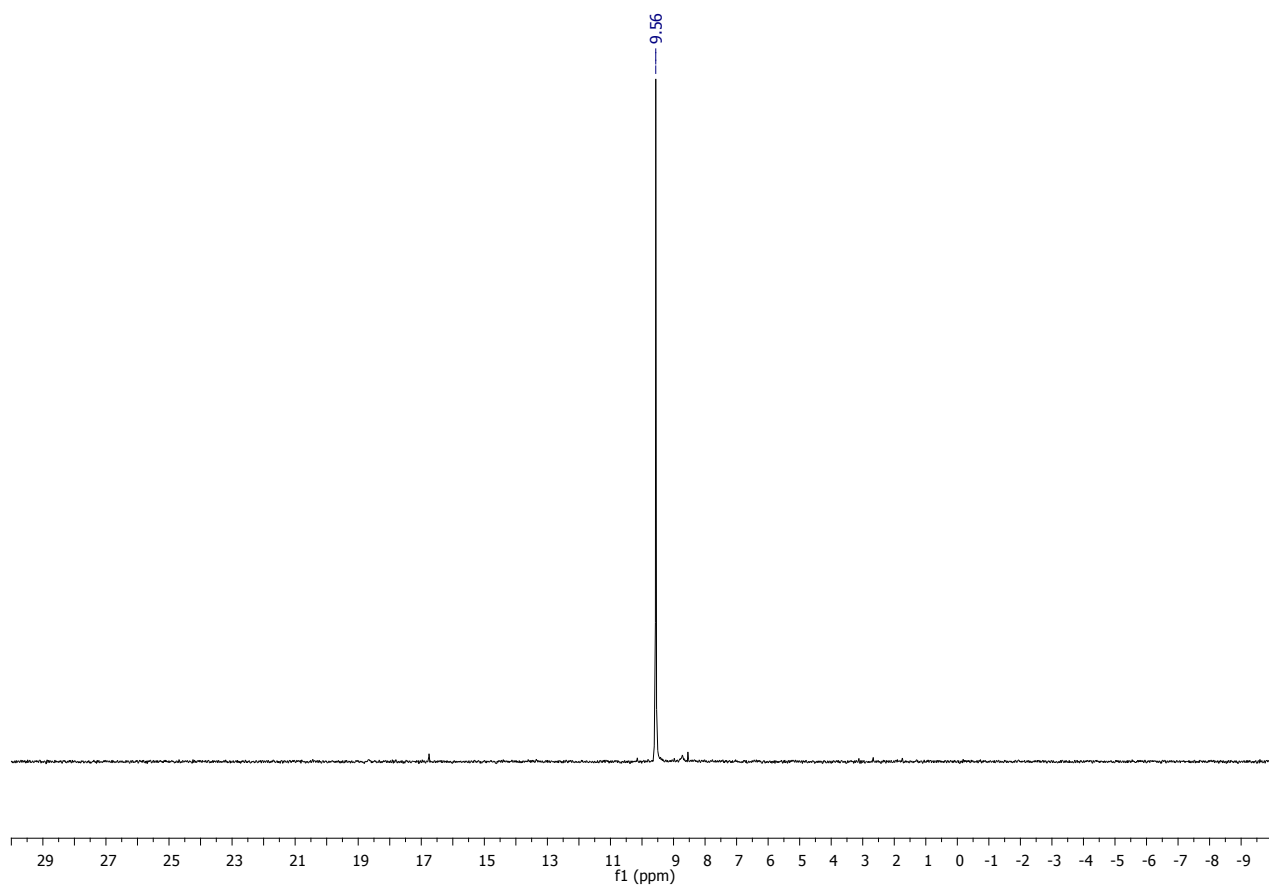

Supplement: c8ob03079k1.pdf [file c8ob03079k1.pdf]
